# Supplementary material
Source: PubMed Central journal article supplement (PMC7075318)
Supplement: NIHMS1557310-supplement-Supplemental_Information.pdf [file NIHMS1557310-supplement-Supplemental_Information.pdf]

**A Mechanistic Investigation of Enantioconvergent Kumada Reactions  
of Racemic  $\alpha$ -Bromoketones Catalyzed by a Nickel/Bis(oxazoline) Complex**

Haolin Yin and Gregory C. Fu\*

Division of Chemistry and Chemical Engineering, California Institute of Technology,  
Pasadena, California 91125, United States

**Supporting Information**

**Table of Contents**

|              |                                        |             |
|--------------|----------------------------------------|-------------|
| <b>I.</b>    | <b>General Information</b>             | <b>S-2</b>  |
| <b>II.</b>   | <b>Synthesis</b>                       | <b>S-4</b>  |
| <b>III.</b>  | <b>Model Catalyzed Reaction (eq 3)</b> | <b>S-7</b>  |
| <b>IV.</b>   | <b>Radical-Probe Experiments</b>       | <b>S-11</b> |
| <b>V.</b>    | <b>Stoichiometric Reactions</b>        | <b>S-15</b> |
| <b>VI.</b>   | <b>EPR Data</b>                        | <b>S-17</b> |
| <b>VII.</b>  | <b>UV-Vis Data</b>                     | <b>S-18</b> |
| <b>VIII.</b> | <b>NMR Data</b>                        | <b>S-20</b> |
| <b>IX.</b>   | <b>X-Ray Crystallographic Data</b>     | <b>S-28</b> |
| <b>X.</b>    | <b>Computational Details</b>           | <b>S-53</b> |

## I. General Information

**Materials.** The following reagents were purchased from commercial suppliers and used as received: Ni(cod)<sub>2</sub> (Strem), NiBr<sub>2</sub>(dme) (Sigma-Aldrich), PhMgBr (3.0 M in Et<sub>2</sub>O, Sigma-Aldrich). (*R,R*)-Ph-BOX and (*S,S*)-Ph-BOX ligands were prepared according to a literature procedure;<sup>1</sup> (*R,R*)-Ph-BOX was used in experiments, unless otherwise noted. (±)-2-Bromopropiophenone was purchased from Sigma-Aldrich and distilled before use. DME, THF, toluene, Et<sub>2</sub>O, and *n*-pentane were sparged with dry argon and dried via a solvent purification system comprised of columns packed with neutral alumina.

**Chromatography.** Gas chromatography data were collected on an Agilent 6890N GC system with an FID detector. Yields by GC were determined using calibration curves, using *n*-dodecane as an internal standard. Analysis of enantioenriched organic compounds was conducted on an Agilent 1100 series HPLC using Daicel CHIRALCEL® or Daicel CHIRALPAK® columns (internal diameter 4.6 mm, column length 250 mm, particle size 5 μm).

**Elemental analysis.** Elemental analyses were carried out at the Beckman Institute at Caltech with a PerkinElmer 2400 Series II CHN Elemental Analyzer or at Midwest Microlab.

**Mass spectrometry.** ESI-MS experiments were collected using an Agilent 6200 Series TOF MS with Agilent G1978A multimode source in electrospray ionization mode. GC-MS data were collected on an Agilent 7890A GC system with an Agilent 5975C mass detector.

**Spectroscopy.** X-Band continuous-wave EPR measurements were conducted on a Bruker EMX spectrometer with the sample in a frozen solvent glass at 77 K. Simulation of EPR spectra was accomplished using the EasySpin package.<sup>2</sup>

UV-vis spectra were collected on a Cary 50 UV-vis spectrometer using a 10 mm path-length quartz cuvette equipped with a puncturable screw cap. Variable-temperature measurements employed a Unisoku CoolSpek cryostat.

<sup>1</sup>H and <sup>13</sup>C NMR spectra were collected on a 400 MHz Varian spectrometer with a broadband cryoprobe. Variable-temperature multi-nuclear NMR data were collected on a 500 MHz Varian spectrometer.

FT-IR measurements of organic compounds were carried out on a Thermo Scientific Nicolet iS5 FT-IR spectrometer equipped with an iD5 ATR accessory. FT-IR

---

(1) García, J. I.; Mayoral, J. A.; Pires, E.; Villalba, I. Synthesis of Non-Symmetric Bisoxazoline Compounds. An Easy Way to Reach Tailored Chiral Ligands. *Tetrahedron: Asymmetry* **2006**, *17*, 2270–2275.

(2) Stoll, S.; Schweiger, A. EasySpin, a Comprehensive Software Package for Spectral Simulation and Analysis in EPR. *J. Magn. Reson.* **2006**, *178*, 42–55.

measurements of nickel complexes were conducted in a nitrogen-filled glovebox using a Bruker Alpha FT-IR spectrometer equipped with a single-reflection diamond ATR module.

**X-ray crystallography.** Single-crystal diffraction data were collected at the Beckman Institute at Caltech with a Bruker SMART 1000 CCD diffractometer with filtered Mo-K $\alpha$  radiation.

## II. Synthesis

These yields have not been optimized.

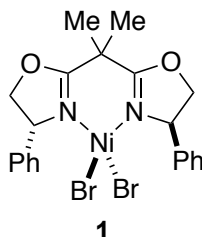

### Ni<sup>II</sup>Br<sub>2</sub>(Ph-BOX) (1).

**Method A: From NiBr<sub>2</sub>(dme).** (*R,R*)-Ph-BOX (0.668 g, 2.00 mmol) and NiBr<sub>2</sub>(dme) (0.617 g, 2.00 mmol) were weighed in the air and added to a 100 mL round bottom flask. Anhydrous THF (50 mL) was added, resulting in an immediate color change to purple. The mixture was heated at 65 °C for 4 h, and then it was filtered through Celite (dried at 140 °C for 3 h prior to use) packed on a medium-size fritted filter. The Celite was washed with THF (3 mL × 3), the filtrates were combined, and the volatiles were removed under reduced pressure, affording a magenta solid. The resulting magenta solid was collected on a medium-size fritted filter, washed with anhydrous Et<sub>2</sub>O (5 mL × 3), and dried under reduced pressure. Yield: 1.04 g (94%). The product was stored in a glovebox.

**Method B: From Ni(cod)<sub>2</sub> (eq 6).** Bromobenzene (0.188 g, 1.20 mmol) was added to a solution of (*R,R*)-Ph-BOX (0.110 g, 0.330 mmol) and Ni(cod)<sub>2</sub> (0.083 g, 0.300 mmol) in toluene (5 mL). The mixture was left undisturbed for 24 h, resulting in the precipitation of a magenta crystalline solid. The solid was washed with *n*-pentane (3 mL × 3) and dried under reduced pressure. Yield: 0.130 g (78%). The biphenyl byproduct in the supernatant of the reaction was identified by GC-MS.

This complex is not sensitive to dry air, but it degrades slowly in the presence of moisture.

Crystals suitable for X-ray crystallography were obtained by DME/*n*-pentane vapor diffusion at room temperature.

<sup>1</sup>H NMR (400 MHz, THF-*d*<sub>8</sub>, 300 K) δ 64.04 (br, 2H), 18.89 (s, 2H), 17.17 (br, 4H), 9.31 (br, 2H), 9.17 (br, 4H), 5.93 (br, 2H), 1.23 (br, 6H). This is a high-spin Ni(II) complex.

Because the sample is paramagnetic, the <sup>13</sup>C NMR signals are too weak to be observed.

FT-IR (solid) 1651, 1477, 1452, 1425, 1389, 1231, 1137, 979, 758, 743, 697 cm<sup>-1</sup>.

Elemental analysis calculated for C<sub>21</sub>H<sub>22</sub>Br<sub>2</sub>N<sub>2</sub>NiO<sub>2</sub>: C, 45.62; H, 4.01; N, 5.07. Found: C, 45.73; H, 4.00; N, 5.04.

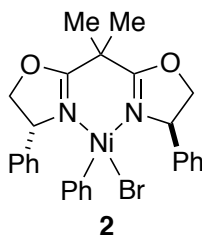

**Ni<sup>II</sup>PhBr(Ph-BOX) (2) (eq 7).** *n*-Pentane (50 mL) was added to a 100 mL round bottom flask that contained (*R,R*)-Ph-BOX (0.334 g, 1.00 mmol) and Ni(cod)<sub>2</sub> (0.275 g, 1.00 mmol). The resulting yellow mixture was stirred vigorously at room temperature for 1 h, and then it was filtered through an acrodisc. To the filtrate was added bromobenzene (0.173 g, 1.10 mmol), and the resulting mixture was stirred vigorously for 3 h, during which time an orange precipitate formed. The orange powder was collected on a medium-porosity fritted filter, washed with *n*-pentane (3 mL × 3), and dried under reduced pressure. Yield: 0.376 g (68%).

This complex is sensitive to air and to moisture in the solid state, and it decomposes rapidly at room temperature in DME.

FT-IR (solid) 1653, 1494, 1474, 1229, 1131, 935, 744, 729, 694 cm<sup>-1</sup>.

Elemental analysis calculated for C<sub>27</sub>H<sub>27</sub>BrN<sub>2</sub>NiO<sub>2</sub>: C, 58.95; H, 4.95; N, 5.09. Found: C, 58.46; H, 5.38; N, 5.17.

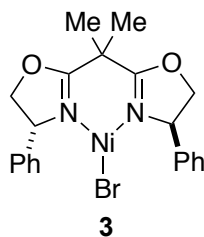

**Ni<sup>I</sup>Br(Ph-BOX) (3) (eq 8).** THF (5 mL, pre-cooled to -40 °C) was added to a 20 mL vial that contained Ni<sup>II</sup>PhBr(Ph-BOX) (**2**; 0.055 g, 0.100 mmol, pre-cooled to -40 °C), resulting in a clear orange solution. The orange solution was layered with *n*-pentane (5 mL, pre-cooled to -40 °C) and stored at -40 °C for 1 day, resulting in the formation of a yellow solid. The yellow solid was collected on a medium-porosity fritted filter, washed with cold *n*-pentane (-40 °C; 1 mL), and dried under reduced pressure. Yield: 0.031 g (66%).

This complex is sensitive to air and to moisture in the solid state, and it decomposes at room temperature in solution.

Crystals suitable for X-ray crystallography were obtained by THF/*n*-pentane layering at -78 °C.

<sup>1</sup>H NMR (THF-*d*<sub>6</sub>, 500 MHz, 243 K) δ 7.18 (br). This is a paramagnetic Ni(I) complex.

FT-IR (solid) 1656, 1476, 1454, 1384, 1229, 1122, 752, 698  $\text{cm}^{-1}$ .

Elemental analysis calculated for  $\text{C}_{21}\text{H}_{22}\text{BrN}_2\text{NiO}_2 \cdot \text{C}_4\text{H}_8\text{O}$ : C, 55.08; H, 5.55; N, 5.14. Found: C, 55.12; H, 5.06; N, 5.55.

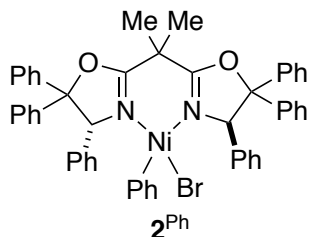

**$\text{Ni}^{\text{II}}\text{PhBr}(\text{Ph-BOX}^{\text{Ph}})$  ( $2^{\text{Ph}}$ ) (eq 7).** *n*-Pentane (20 mL) was added to a 20 mL vial that contained (*R,R*)-Ph-BOX<sup>Ph</sup> (0.128 g, 0.200 mmol) and Ni(cod)<sub>2</sub> (0.055 g, 0.200 mmol). The resulting yellow solution was stirred at room temperature for 10 min, and then it was filtered through an acrodisc into a 20 mL vial that contained bromobenzene (0.035 g, 0.22 mmol). The mixture was stirred for 2 h, resulting in the precipitation of an orange solid. The orange solid was collected on a medium-porosity fritted filter, washed with *n*-pentane (3 mL  $\times$  3), and dried under reduced pressure. Yield: 0.131 g (77%).

This complex is sensitive to air and to moisture in the solid state, and it decomposes rapidly when stored as a solution in DME above  $-10$   $^{\circ}\text{C}$ .

Crystals suitable for X-ray crystallography were obtained by THF/*n*-pentane layering at  $-40$   $^{\circ}\text{C}$ . Both the THF and the *n*-pentane were pre-cooled to  $-40$   $^{\circ}\text{C}$  before use in the recrystallization.

$^1\text{H}$  NMR (THF-*d*<sub>3</sub>, 500 MHz, 243 K)  $\delta$  7.83 (d,  $J = 7.5$  Hz, 1H), 7.74 (d,  $J = 8.4$  Hz, 2H), 7.60 – 7.39 (m, H), 7.37 – 7.25 (m, 2H), 7.14 (d,  $J = 7.3$  Hz, 1H), 7.02 – 6.77 (m, 18H), 6.72 – 6.70 (m, 2H), 6.68 (s, 1H), 6.34 (t,  $J = 7.5$  Hz, 1H), 6.06 (s, 1H), 1.95 (s, 3H), 1.91 (s, 3H).

FT-IR (solid) 1649, 1447, 1137, 971, 745, 732, 692, 620  $\text{cm}^{-1}$ .

Elemental analysis calculated for  $\text{C}_{51}\text{H}_{43}\text{BrN}_2\text{NiO}_2$ : C, 71.69; H, 5.07; N, 3.28. Found: C, 71.40; H, 5.15; N, 3.21.

### III. Model Catalyzed Reaction (eq 3)

**Model catalyzed reaction.** In a nitrogen-filled glovebox, a solution of PhMgBr in Et<sub>2</sub>O (3.0 M; 37  $\mu$ L, 0.11 mmol) was added to DME (8.0 mL) in a 20 mL vial equipped with a stir bar and fitted with a PTFE septum cap. This mixture was stirred until it was homogeneous, and then the vial was removed from the glovebox and cooled to  $-60$   $^{\circ}$ C. In a nitrogen-filled glovebox, Ni<sup>II</sup>Br<sub>2</sub>(Ph-BOX) (**1**; 3.9 mg, 0.0070 mmol) and DME (2.0 mL) were added to a 4.0 mL vial equipped with a stir bar. The reaction mixture was stirred for 5 min until it was homogeneous. Next, 2-bromopropiophenone (15  $\mu$ L, 0.10 mmol) was added. The mixture was stirred at room temperature for 5 min, and then the resulting purple solution was removed from the glovebox and added dropwise over 30 s to the  $-60$   $^{\circ}$ C solution of PhMgBr. The resulting orange-yellow solution was stirred at  $-60$   $^{\circ}$ C for 20 h, and then the reaction was quenched by the addition of ethanol (1.0 mL). The resulting mixture was analyzed via GC and chiral HPLC.

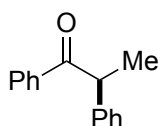

**(S)-1,2-Diphenylpropan-1-one (eq 3).** The title compound was synthesized from ( $\pm$ )-2-bromo-1-phenyl-1-propanone and PhMgBr using the above procedure (Ni<sup>II</sup>Br<sub>2</sub>((*R,R*)-Ph-BOX)). The product was purified by chromatography on silica gel (3% EtOAc/hexanes), which furnished a colorless oil in 75% yield, 90% ee.

A second run conducted with Ni<sup>II</sup>Br<sub>2</sub>((*S,S*)-Ph-BOX) provided the product in 74% yield,  $-90\%$  ee.

The characterization data are consistent with our previous report.<sup>3</sup>

**Time-course experiment (Figure 3).** In a nitrogen-filled glovebox, a solution of PhMgBr in Et<sub>2</sub>O (3.0 M; 37  $\mu$ L, 0.11 mmol) was added to DME (8.0 mL) in a 20 mL vial fitted with a PTFE septum cap. This mixture was stirred until it was homogeneous, and then the vial was removed from the glovebox and cooled to  $-60$   $^{\circ}$ C. A solution of Ni<sup>II</sup>Br<sub>2</sub>(Ph-BOX) (**1**; 3.9 mg, 0.0070 mmol), 2-bromopropiophenone (15  $\mu$ L, 0.10 mmol), and *n*-dodecane (23  $\mu$ L, 0.10 mmol) in DME (2.0 mL) was added to this vial via syringe over 30 s, with stirring. The puncture was then sealed with Dow Corning grease. At

---

(3) Lou, S.; Fu, G. C. Nickel/Bis(oxazoline)-Catalyzed Asymmetric Kumada Reactions of Alkyl Electrophiles: Cross-Couplings of Racemic  $\alpha$ -Bromoketones. *J. Am. Chem. Soc.* **2010**, *132*, 1264–1266.

each indicated time point, an aliquot (0.5 mL) of the reaction was removed, quenched with EtOH (0.1 mL), and subjected to analysis via GC and chiral HPLC.

The same experiment performed using a cold well ( $-60\text{ }^{\circ}\text{C}$ ) in a nitrogen-filled glovebox afforded consistent results.

**Monitoring via EPR spectroscopy.** In a nitrogen-filled glovebox, a solution of PhMgBr in Et<sub>2</sub>O (3.0 M; 37  $\mu\text{L}$ , 0.11 mmol) was added to DME (8.0 mL) in a 20 mL vial fitted with a PTFE septum cap. This mixture was stirred until it was homogeneous, and then it was cooled to  $-60\text{ }^{\circ}\text{C}$ . A solution that contained Ni<sup>II</sup>Br<sub>2</sub>(Ph-BOX) (**1**; 3.9 mg, 0.0070 mmol), 2-bromopropiophenone (15  $\mu\text{L}$ , 0.10 mmol), and *n*-dodecane (23  $\mu\text{L}$ , 0.10 mmol) in DME (2.0 mL) was added via syringe over 30 s, with stirring.

At each indicated time point, an aliquot (0.3 mL) of the reaction mixture was transferred via syringe to an EPR tube (pre-cooled to  $-60\text{ }^{\circ}\text{C}$ ) equipped with a rubber septum sealed under N<sub>2</sub>. The puncture in the rubber septum was sealed with Dow Corning grease. The EPR tube was then promptly frozen with liquid nitrogen and subjected to EPR analysis at 77 K.

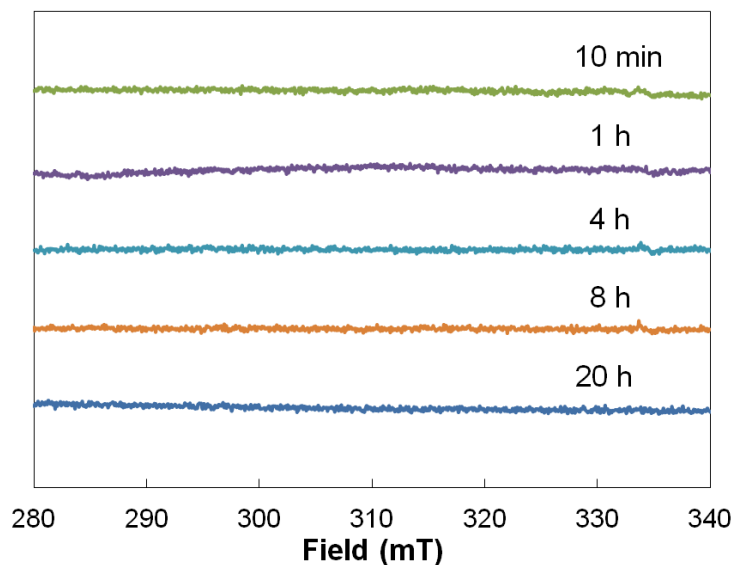

**Figure S-1.** X-band EPR spectra of the coupling reaction after 10 min, 1 h, 4 h, 8 h, and 20 h. The spectra were collected at  $\nu = 9.4\text{ GHz}$ , 2 mW power, and a modulation amplitude of 2 G.

**Monitoring via UV-vis spectroscopy.** In a nitrogen-filled glovebox, a solution of PhMgBr in Et<sub>2</sub>O (3.0 M; 15  $\mu\text{L}$ , 0.044 mmol) was added to DME (3.2 mL) in a quartz cuvette. The cuvette was then sealed with a puncturable screw cap and cooled to  $-60\text{ }^{\circ}\text{C}$ . A solution that contained Ni<sup>II</sup>Br<sub>2</sub>(Ph-BOX) (**1**; 1.5 mg, 0.0028 mmol), 2-



bromopropiophenone (6.0  $\mu\text{L}$ , 0.040 mmol), and *n*-dodecane (9.0  $\mu\text{L}$ , 0.040 mmol) in DME (0.8 mL) was added via syringe over 10 s, with stirring. Spectra were collected every 5 minutes.

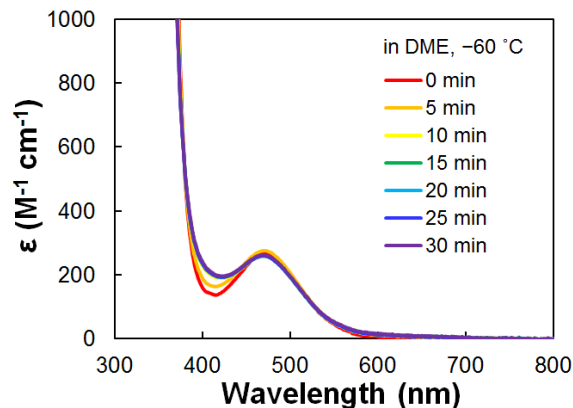

**Figure S-2.** UV-vis spectra (DME,  $-60\text{ }^{\circ}\text{C}$ ) of the coupling reaction. The absorption from PhMgBr has been subtracted.

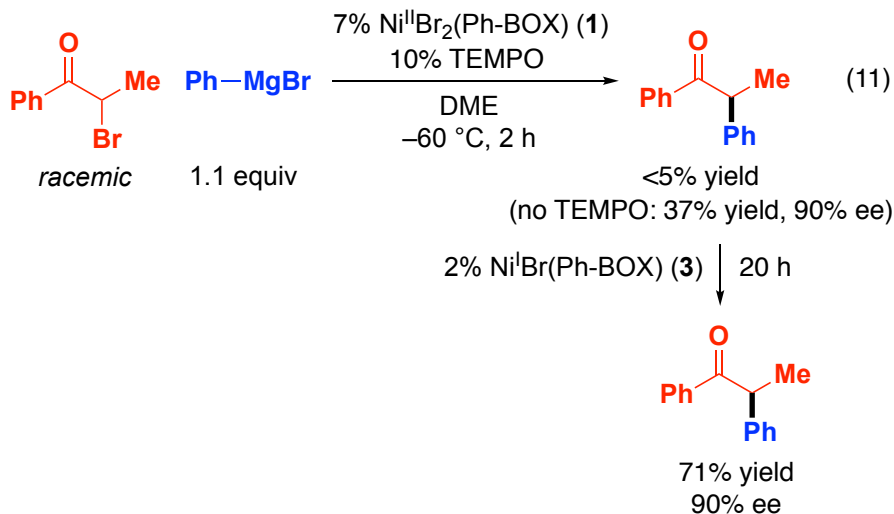

**TEMPO inhibition and reactivation (eq 11).** In a nitrogen-filled glovebox, a solution of PhMgBr in Et<sub>2</sub>O (3.0 M; 37  $\mu\text{L}$ , 0.11 mmol) was added to DME (8.0 mL) in a 20 mL vial fitted with a PTFE septum cap. This mixture was stirred until it was homogeneous, and then it was cooled to  $-60\text{ }^{\circ}\text{C}$ . A solution that contained Ni<sup>II</sup>Br<sub>2</sub>(Ph-BOX) (**1**; 3.9 mg, 0.0070 mmol), 2-bromopropiophenone (15  $\mu\text{L}$ , 0.10 mmol), TEMPO (1.5 mg, 0.010 mmol), and *n*-dodecane (23  $\mu\text{L}$ , 0.10 mmol) in DME (2.0 mL) was added via syringe over 30 s, with stirring. An aliquot (0.5 mL) was taken after 2 h, quenched with EtOH, and analyzed via GC.

A solution that contained Ni<sup>II</sup>Br(Ph-BOX) (**3**; 0.0020 mmol) in DME (0.5 mL) at -60 °C was added via pipette. After stirring at -60 °C for 20 h, the reaction was quenched with EtOH and analyzed via GC and chiral HPLC.

#### IV. Radical-Probe Experiments

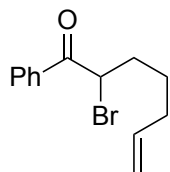

**2-Bromo-1-phenylhept-6-en-1-one.** 1-Phenylhept-6-en-one (1.22 g, 6.5 mmol)<sup>4</sup> was added to a solution that contained LDA (1.07 g, 10.0 mmol) in THF (5 mL) at  $-78\text{ }^{\circ}\text{C}$ . The reaction mixture was stirred at  $-78\text{ }^{\circ}\text{C}$  for 15 min, and then  $\text{Me}_3\text{SiCl}$  (1.41 g, 13.0 mmol) was added. The mixture was allowed to warm to room temperature, and then it was stirred for 2 h. Next, the volatiles were removed, and  $\text{CH}_2\text{Cl}_2$  (10 mL) and then *N*-bromosuccinimide (1.39 g, 7.8 mmol; added portionwise) were added. The reaction mixture was stirred for 16 h, and then the reaction was quenched with water (10 mL). The aqueous layer was extracted with  $\text{CH}_2\text{Cl}_2$  (10 mL  $\times$  3). The organic layers were combined, dried over  $\text{MgSO}_4$ , filtered, and concentrated. The product was purified via flash chromatography on silica gel (eluted with  $\text{CH}_2\text{Cl}_2$ :hexanes 3:7; colorless oil, 1.15 g, 66% yield).

$^1\text{H}$  NMR ( $\text{CDCl}_3$ , 400 MHz)  $\delta$  8.03 – 8.00 (m, 2H), 7.63 – 7.57 (m, 1H), 7.52 – 7.47 (m, 2H), 5.85 – 5.75 (m, 1H), 5.15 (dd,  $J = 7.9, 6.4$  Hz, 1H), 5.08 – 5.01 (m, 1H), 5.00 – 4.96 (m, 1H), 2.27 – 2.09 (m, 4H), 1.70 – 1.46 (m, 2H).

$^{13}\text{C}$  NMR ( $\text{CDCl}_3$ , 100 MHz)  $\delta$  193.3, 138.0, 134.6, 133.9, 129.0, 128.9, 115.5, 47.2, 33.3, 33.0, 26.9.

FT-IR (film) 3074, 2932, 1687, 1596, 1448, 1279, 1249, 914, 704, 686  $\text{cm}^{-1}$ .

MS (ESI)  $m/z$  ( $[\text{M}+\text{H}]^+$ ) calcd for  $\text{C}_{13}\text{H}_{16}\text{BrO}$ : 267, found 267.

---

(4) Eddaif, A.; Laurent, A.; Mison, P.; Pellissier, N.; Carrupt, P. A.; Vogel, P. Intramolecular Diels-Alder Reactions of 3H-Pyrroles Resulting from Thermal Rearrangements of 2H-Pyrroles. *J. Org. Chem.* **1987**, *52*, 5548–5560.

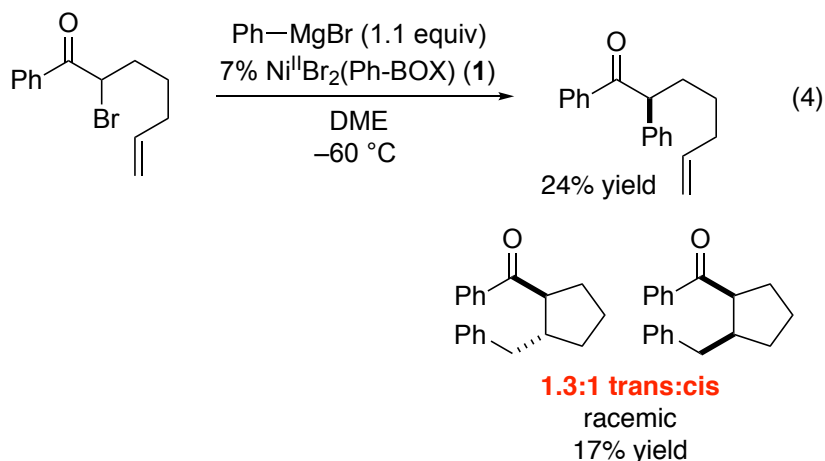

**Cyclization study (eq 4).** In a nitrogen-filled glovebox, a solution of PhMgBr in Et<sub>2</sub>O (3.0 M; 37  $\mu$ L, 0.11 mmol) was added to DME (8.0 mL) in a 20 mL vial equipped with a stir bar and fitted with a PTFE septum cap. This mixture was stirred until it was homogeneous, and then it was removed from the glovebox and cooled to  $-60 \text{ }^\circ\text{C}$ . In a nitrogen-filled glovebox, Ni<sup>II</sup>Br<sub>2</sub>(Ph-BOX) (**1**; 3.9 mg, 0.0070 mmol) and DME (1.0 mL) were added to a 4.0 mL vial equipped with a stir bar. The reaction mixture was stirred for 5 min, at which time it was homogeneous. Next, 2-bromo-1-phenylhept-6-en-1-one (27 mg, 0.10 mmol) in DME (1.0 mL) was added. The mixture was stirred at room temperature for 5 min, and then the vial was removed from the glovebox, and the purple solution was added dropwise over 30 s to the  $-60 \text{ }^\circ\text{C}$  solution of PhMgBr. The resulting orange-yellow solution was stirred at  $-60 \text{ }^\circ\text{C}$  for 20 h, and then the reaction was quenched with ethanol (1.0 mL). The resulting mixture was filtered through a pad of silica gel (height: 3.0 cm). The silica was washed with Et<sub>2</sub>O (3 mL  $\times$  3), and then the combined filtrates were concentrated and dried under vacuum. The residue was subjected to analysis via <sup>1</sup>H NMR spectroscopy (with 1,1,2,2-tetrachloroethane as an internal standard) and chiral HPLC.

The uncyclized (**U**) product was formed in 24% yield (75% ee), the trans cyclized product (**C**) was formed in 9% yield, and the cis cyclized product (**C**) was formed in 8% yield.

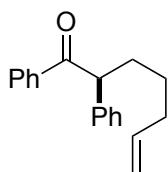

**(S)-1,2-Diphenyl-phenylhept-6-en-1-one.** Colorless oil.

The ee was determined via HPLC on a CHIRALCEL AD-H column (1% iPrOH/hexanes, 1.0 mL/min) with  $t_r = 12.1$  (major), 13.7 min (minor).

$^1\text{H}$  NMR ( $\text{CDCl}_3$ , 400 MHz)  $\delta$  7.85 – 7.80 (m, 2H), 7.35 – 7.30 (m, 1H), 7.26 – 7.20 (m, 2H), 7.19 – 7.11 (m, 4H), 7.08 – 7.02 (m, 1H), 5.69 – 5.56 (m, 1H), 4.88 – 4.81 (m, 1H), 4.81 – 4.76 (m, 1H), 4.41 (t,  $J$  = 8.0 Hz, 1H), 2.11 – 2.00 (m, 1H), 2.00 – 1.85 (m, 2H), 1.77 – 1.65 (m, 1H), 1.36 – 1.11 (m, 2 H).

$^{13}\text{C}$  NMR ( $\text{CDCl}_3$ , 100 MHz)  $\delta$  200.1, 139.8, 138.6, 137.0, 133.0, 129.0, 128.8, 128.6, 128.3, 127.1, 114.8, 53.7, 33.9, 33.7, 27.1.

FT-IR (film) 3063, 2929, 1682, 1598, 1448, 1226, 912, 755, 698  $\text{cm}^{-1}$ .

MS (ESI)  $m/z$  ( $[\text{M}+\text{H}]^+$ ) calcd for  $\text{C}_{19}\text{H}_{21}\text{O}$ : 265.1587, found 265.1585.

$[\alpha]^{22}_{\text{D}} = 103^\circ$  ( $c = 1.0$ ,  $\text{CHCl}_3$ ); 75% ee.

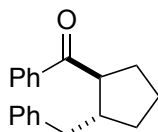

***trans*-(2-Benzylcyclopentyl)(phenyl)methone.** Colorless oil.

The ee was determined via HPLC on a CHIRALCEL AD-H column (1%  $^i\text{PrOH}$ /hexanes, 1.0 mL/min) with  $t_r = 12.8, 16.4$  min (racemic).

$^1\text{H}$  NMR ( $\text{CDCl}_3$ , 400 MHz)  $\delta$  7.85 – 7.77 (m, 2H), 7.56 – 7.49 (m, 1H), 7.44 – 7.38 (m, 2H), 7.25 – 7.20 (m, 2H), 7.18 – 7.10 (m, 3H), 3.46 (dt,  $J = 9.2, 6.8$  Hz, 1H), 2.80 – 2.70 (m, 2H), 2.62 – 2.57 (m, 1H), 2.15 – 2.03 (m, 1H), 1.90 – 1.65 (m, 4H), 1.45 – 1.35 (m, 1H).

$^{13}\text{C}$  NMR ( $\text{CDCl}_3$ , 100 MHz)  $\delta$  202.9, 141.0, 137.1, 132.7, 129.0, 128.4, 128.3, 128.2, 125.9, 51.8, 44.7, 41.0, 32.1, 30.8, 24.6.

FT-IR (film) 3026, 2952, 1678, 1448, 1221, 1002, 746, 700  $\text{cm}^{-1}$ .

MS (ESI)  $m/z$  ( $[\text{M}+\text{H}]^+$ ) calcd for  $\text{C}_{19}\text{H}_{21}\text{O}$ : 265.1587, found 265.1588.

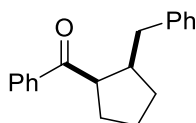

***cis*-(2-Benzylcyclopentyl)(phenyl)methone.** Colorless oil.

The ee was determined via HPLC on a CHIRALCEL OJ-H column (1%  $^i\text{PrOH}$ /hexanes, 1.0 mL/min) with  $t_r = 12.9, 15.9$  min (racemic).

$^1\text{H}$  NMR ( $\text{CDCl}_3$ , 400 MHz)  $\delta$  7.98 – 7.93 (m, 2H), 7.58 – 7.52 (m, 1H), 7.48 – 7.42 (m, 2H), 7.20 – 7.14 (m, 2H), 7.13 – 7.07 (m, 1H), 7.01 – 6.96 (m, 2H), 3.88 (q,  $J = 7.6$  Hz, 1H), 2.70 – 2.60 (m, 1H), 2.56 – 2.48 (m, 1H), 2.42 – 2.33 (m, 1H), 2.25 – 2.13 (m, 1H), 1.95 – 1.83 (m, 2H), 1.74 – 1.61 (m, 1H), 1.61 – 1.50 (m, 2H).

$^{13}\text{C}$  NMR ( $\text{CDCl}_3$ , 100 MHz)  $\delta$  202.7, 141.2, 138.0, 132.8, 128.8, 128.6, 128.1, 125.7, 49.6, 45.7, 36.7, 31.2, 27.9, 23.4.

FT-IR (film) 3025, 2954, 1681, 1652, 1447, 1224, 1002, 734, 699  $\text{cm}^{-1}$ .

MS (ESI)  $m/z$  ( $[\text{M}+\text{H}]^+$ ) calcd for  $\text{C}_{19}\text{H}_{21}\text{O}$ : 265.1587, found 265.1586.

The characterization data of this compound are consistent with a previous report.<sup>5</sup>

***n*-Bu<sub>3</sub>SnH-mediated reductive cyclization (eq 5).** In a nitrogen-filled glovebox, *n*-Bu<sub>3</sub>SnH (32 mg, 0.11 mmol) was added to DME (8.0 mL) in a 20 mL vial equipped with a stir bar and fitted with a PTFE septum cap. This mixture was stirred until it was homogeneous, and then the vial was removed from the glovebox and cooled to -60 °C. Next, 2-bromo-1-phenylhept-6-en-one (27 mg, 0.10 mmol) in DME (2.0 mL) was added via syringe, followed by BEt<sub>3</sub> (1.5 μL, 0.010 mmol) and air (0.2 mL). The resulting colorless solution was stirred at -60 °C for 20 h, and then the reaction was quenched with ethanol (1.0 mL). The resulting mixture was filtered through a bed of silica gel (height: 3.0 cm). The silica was washed with Et<sub>2</sub>O (3 mL × 3), and then the combined filtrates were concentrated and dried under vacuum. The resulting residue was subjected to <sup>1</sup>H NMR analysis. The trans:cis ratio was found to be 1.4:1.

**Dependence of U/C ratio on catalyst loading (Figure 14):**

**Table S-1.** Ratio of uncyclized product (U) to cyclized (C) products.

| Ni loading / mol% | U/C* |
|-------------------|------|
| 2.0               | 0.45 |
| 4.0               | 0.82 |
| 6.0               | 1.28 |
| 8.0               | 1.67 |
| 10.0              | 2.27 |

\* The U/C ratio was determined via <sup>1</sup>H NMR spectroscopy.

---

(5) Ziadi, A.; Martin, R. Ligand-Accelerated Pd-Catalyzed Ketone  $\gamma$ -Arylation via C-C Cleavage with Aryl Chlorides. *Org. Lett.* **2012**, *14*, 1266–1269.

## V. Stoichiometric Reactions

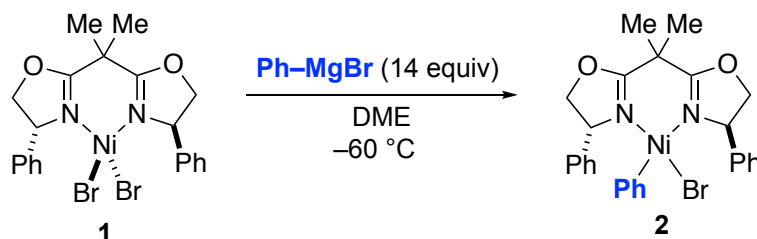

**Transmetalation between  $\text{Ni}^{\text{II}}\text{Br}_2(\text{Ph-BOX})$  and  $\text{PhMgBr}$  (Figure 12).** In a nitrogen-filled glovebox, a solution of  $\text{PhMgBr}$  in  $\text{Et}_2\text{O}$  (3.0 M; 15  $\mu\text{L}$ , 0.044 mmol) was added to DME (3.2 mL) in a quartz cuvette. The cuvette was then sealed with a puncturable screw cap and cooled to  $-60\text{ }^\circ\text{C}$ , and a solution of  $((R,R)\text{-Ph-BOX})\text{Ni}^{\text{II}}\text{Br}_2$  (1.5 mg, 0.0028 mmol) in DME (0.8 mL) was added via syringe over 10 s, with stirring. The reaction was monitored via UV-vis spectroscopy.

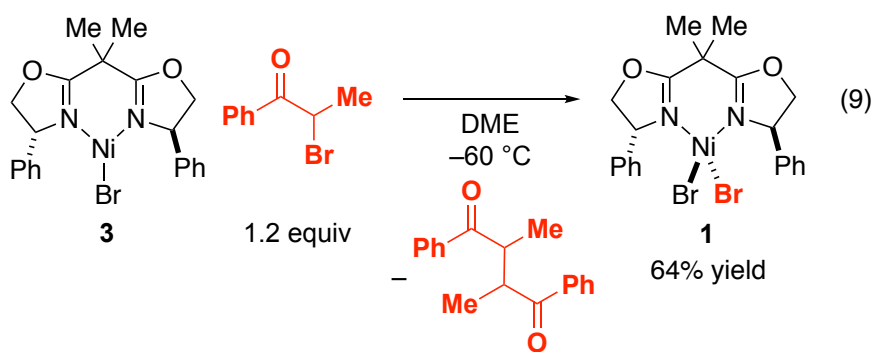

**Abstraction by  $\text{Ni}^{\text{I}}\text{Br}(\text{Ph-BOX})$  (3) of a halogen atom from the  $\alpha$ -bromoketone (eq 9).** In a nitrogen-filled glovebox, a 20 mL vial that contained  $\text{Ni}^{\text{I}}\text{Br}(\text{Ph-BOX})$  (24 mg, 0.050 mmol; yellow solid) was cooled to  $-60\text{ }^\circ\text{C}$ , and then a solution of DME (10 mL; pre-cooled to  $-60\text{ }^\circ\text{C}$ ) was added to the  $\text{Ni}^{\text{I}}\text{PhBr}(\text{Ph-BOX})$ . Then, with stirring, a solution that contained  $(\pm)\text{-2-bromopropiophenone}$  (9.0  $\mu\text{L}$ , 0.060 mmol) in DME (0.20 mL) was added, resulting in an immediate color change to magenta. After 2 h of stirring at  $-60\text{ }^\circ\text{C}$ ,  $\text{Ni}^{\text{II}}\text{Br}_2(\text{Ph-BOX})$  (**1**) was isolated by recrystallization from DME/*n*-pentane (64% yield). The supernatant was filtered through a short plug of silica gel, the volatiles were removed, and the residue was analyzed via  $^1\text{H}$  NMR spectroscopy. The organic products were found to be primarily radical homo-coupling product (23% yield) and hydrodehalogenation product (10% yield).

**Monitoring the reaction of  $\text{Ni}^{\text{I}}\text{Br}(\text{Ph-BOX})$  (3) with the  $\alpha$ -bromoketone or with  $\text{PhMgBr}$  via UV-vis spectroscopy.** In a nitrogen-filled glovebox,  $\text{Ni}^{\text{I}}\text{Br}(\text{Ph-BOX})$  (0.00068 mmol) was added to a cuvette equipped with a stir bar and fitted with a septum cap. The cuvette was removed from the glovebox and cooled to  $-60\text{ }^\circ\text{C}$ . Pre-

cooled DME (3.8 mL;  $-60\text{ }^{\circ}\text{C}$ ) was added via syringe, which led to a homogeneous yellow solution. With stirring, a solution that contained ( $\pm$ )-2-bromopropiophenone (0.00082 mmol) or PhMgBr (3.0 M; 0.00082 mmol) in DME (0.2 mL) was added via syringe. The consumption of Ni<sup>II</sup>Br(Ph-BOX) was monitored via UV-vis spectroscopy, at intervals of 6 s, by the disappearance of the absorption feature at 410 nm.

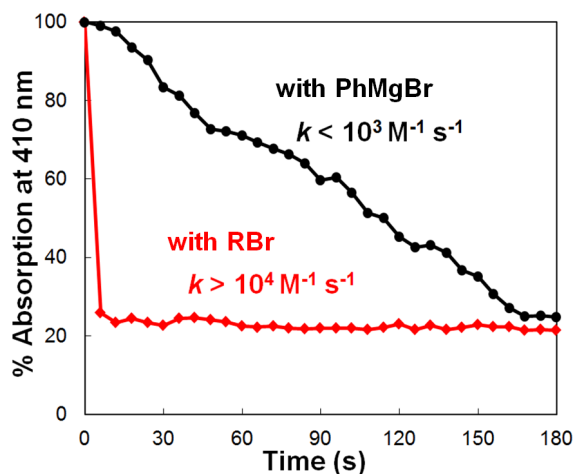

**Figure S-3.** Monitoring via UV-vis spectroscopy of the consumption of Ni<sup>II</sup>Br(Ph-BOX) upon treatment with ( $\pm$ )-2-bromopropiophenone or PhMgBr.

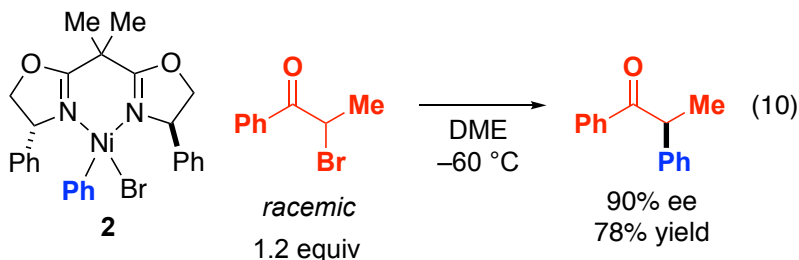

**Coupling of the resting state of nickel (Ni<sup>II</sup>PhBr (Ph-BOX), 2) with the  $\alpha$ -bromoketone (eq 10; Figure 13).** In a nitrogen-filled glovebox, a 40 mL vial that contained Ni<sup>II</sup>PhBr(Ph-BOX) (7.8 mg, 0.014 mmol; orange solid) was cooled to  $-60\text{ }^{\circ}\text{C}$ . Pre-cooled DME (20 mL;  $-60\text{ }^{\circ}\text{C}$ ) was added to the Ni<sup>II</sup>PhBr(Ph-BOX). Then, with stirring, a solution of ( $\pm$ )-2-bromopropiophenone (3.6 mg, 0.017 mmol) in DME (0.20 mL) was added dropwise to the solution of Ni<sup>II</sup>PhBr(Ph-BOX) in DME at  $-60\text{ }^{\circ}\text{C}$ . After 6 h of stirring at  $-60\text{ }^{\circ}\text{C}$ , the reaction was quenched by the addition of ethanol (0.2 mL). The reaction mixture was filtered through a short plug of silica gel and analyzed via GC and chiral HPLC. Calibrated GC yield: 78% (90% ee).



## VI. EPR Data

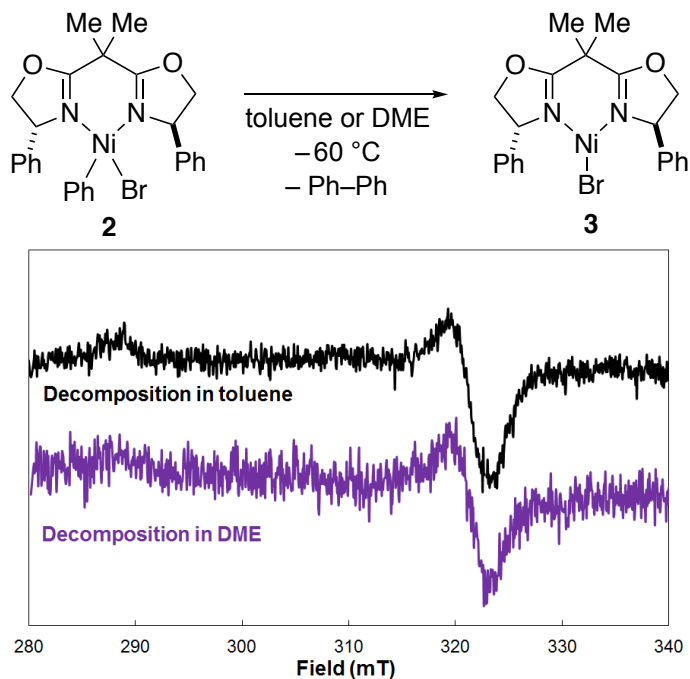

**Figure S-4.** Stability of Ni<sup>II</sup>(Ph)Br(Ph-BOX) (**2**) at -60 °C after 3 h in toluene (black trace) and in DME (purple trace): X-band EPR spectra. Quantification indicated that the quantity of Ni<sup>I</sup>Br(Ph-BOX) (**3**) was <0.5% in both solvents. The spectra were collected at  $\nu = 9.4$  GHz, 2 mW power, and a modulation amplitude of 2 G.

## VII. UV-Vis Data

**General procedure for measuring UV-vis spectra of temperature-sensitive complexes.** In a nitrogen-filled glovebox, the compound was added to a cuvette equipped with a stir bar and fitted with septum cap. The cuvette was removed from the glovebox and cooled to  $-60\text{ }^{\circ}\text{C}$ . In a nitrogen-filled glovebox, DME was added to a 20 mL vial fitted with a PTFE septum cap. The vial was removed from the glovebox, and the solvent was frozen using liquid nitrogen. Upon melting, the cold DME (4 mL) was transferred quickly via syringe into the cuvette (equipped with a balloon) at  $-60\text{ }^{\circ}\text{C}$ . The solution was stirred at  $-60\text{ }^{\circ}\text{C}$  for  $\sim 15\text{ s}$  before collecting a spectrum.

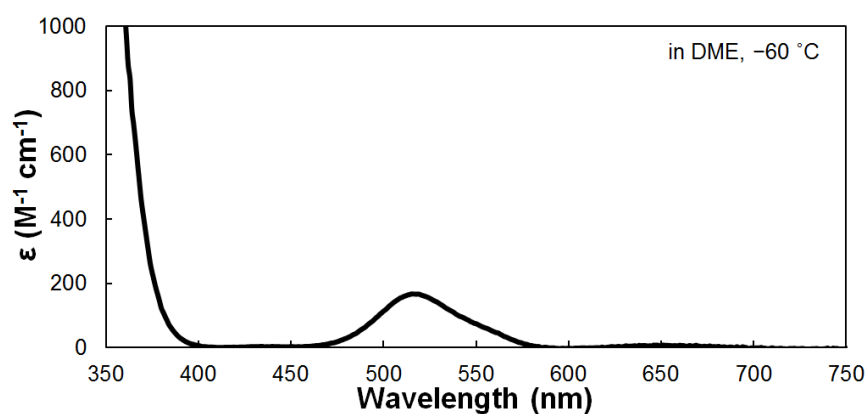

Figure S-5. UV-vis spectrum (DME,  $-60\text{ }^{\circ}\text{C}$ ) of  $((R,R)\text{-Ph-BOX})\text{Ni}^{\text{II}}\text{Br}_2$  (**1**).

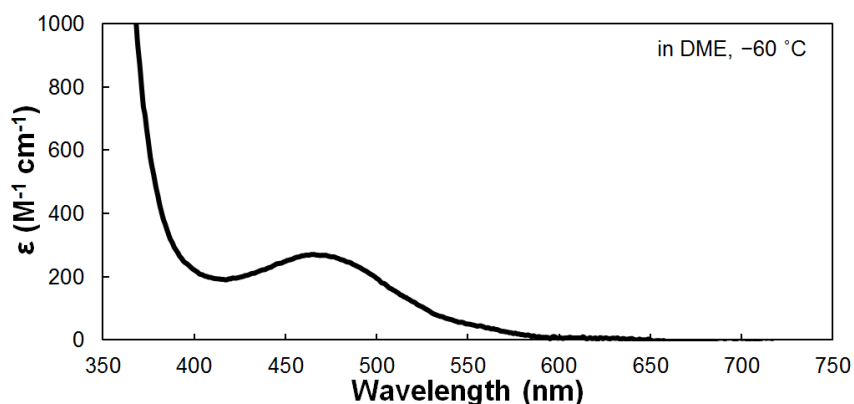

Figure S-6. UV-vis spectrum (DME,  $-60\text{ }^{\circ}\text{C}$ ) of  $((R,R)\text{-Ph-BOX})\text{Ni}^{\text{II}}\text{PhBr}$  (**2**).

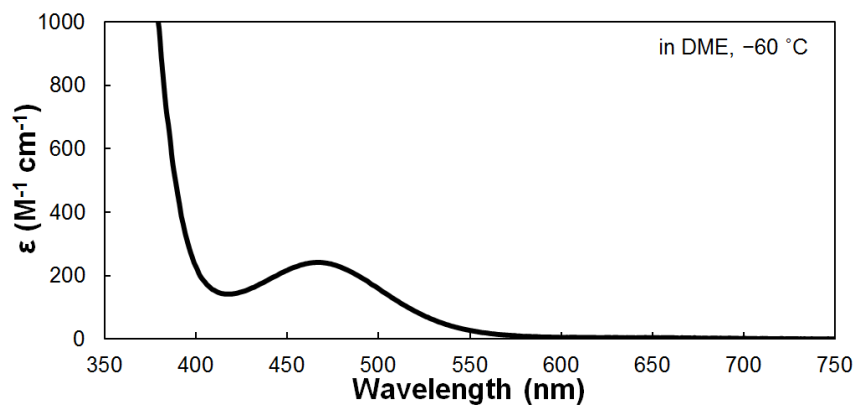

**Figure S-7.** UV-vis spectrum (DME,  $-60\text{ }^{\circ}\text{C}$ ) of  $((R,R)\text{-Ph-BOX}^{\text{Ph}})\text{Ni}^{\text{II}}\text{PhBr}$  ( $2^{\text{Ph}}$ ).

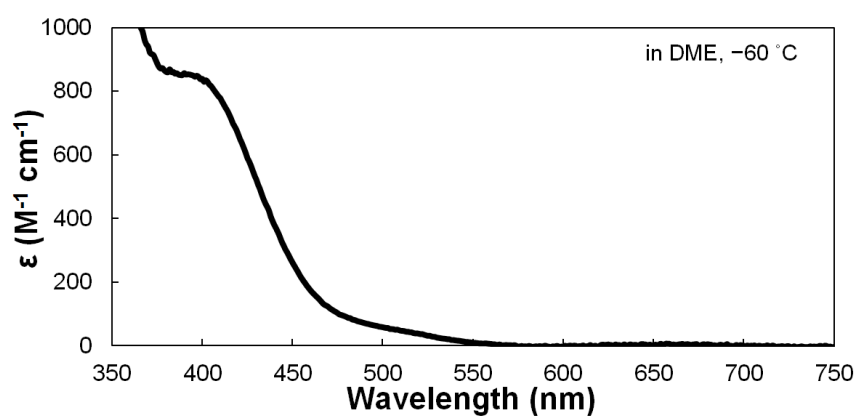

**Figure S-8.** UV-vis spectrum (DME,  $-60\text{ }^{\circ}\text{C}$ ) of  $((R,R)\text{-Ph-BOX})\text{Ni}^{\text{I}}\text{Br}$  ( $3$ ).

### VIII. NMR Data

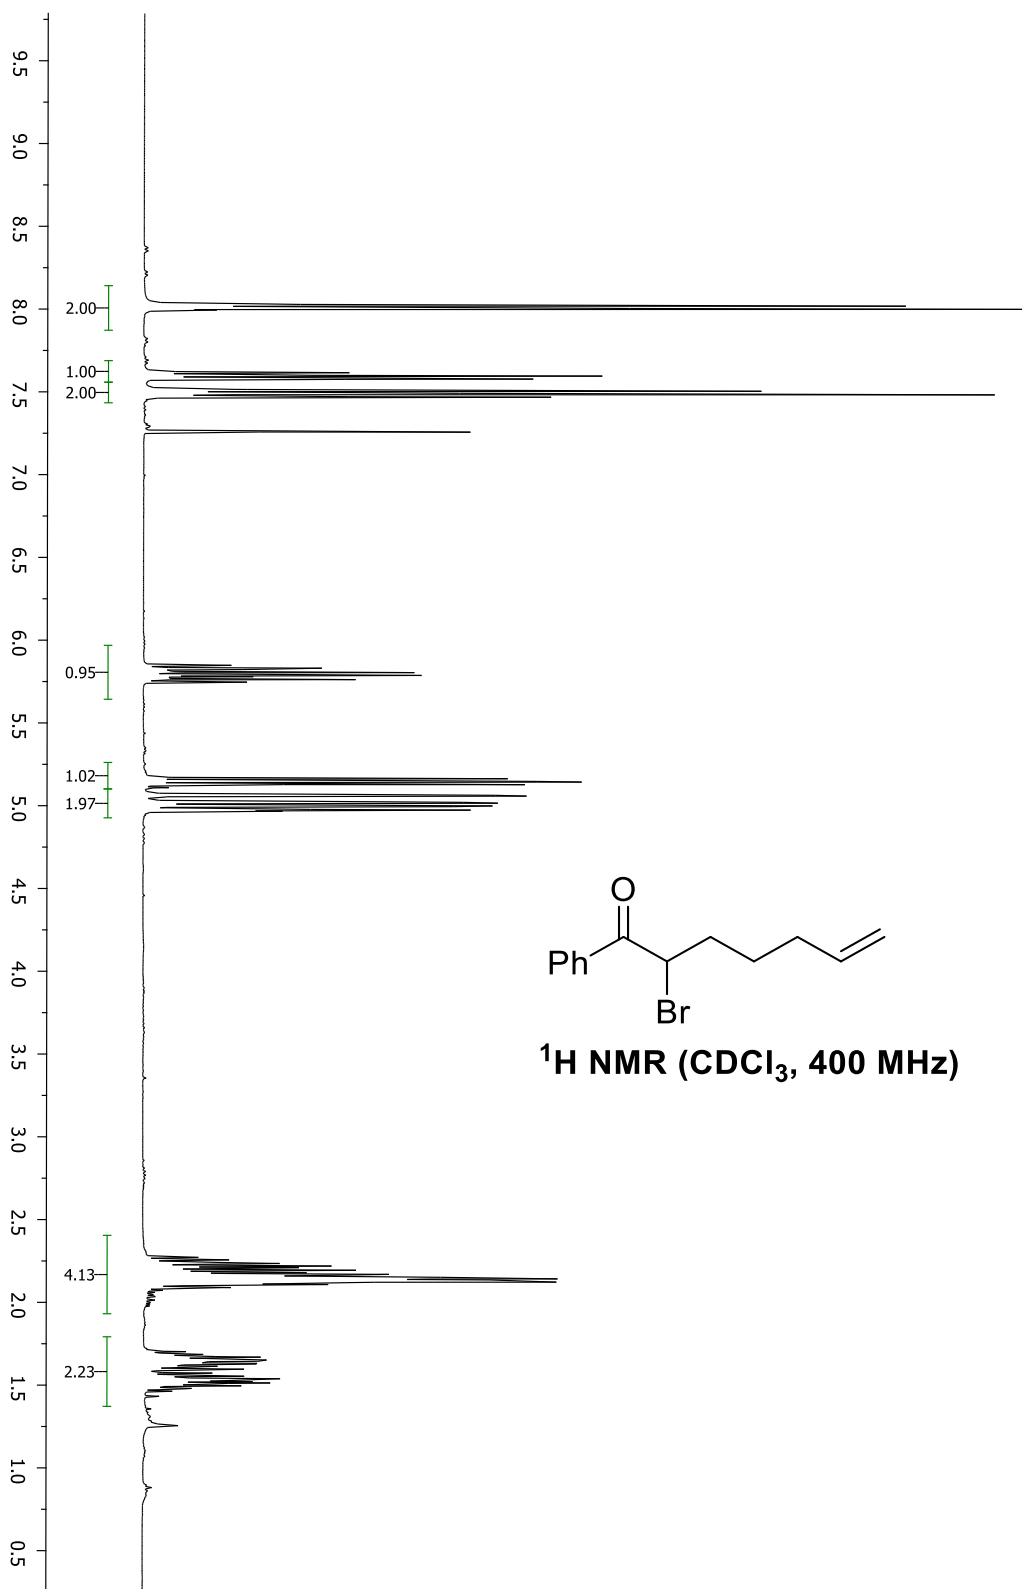

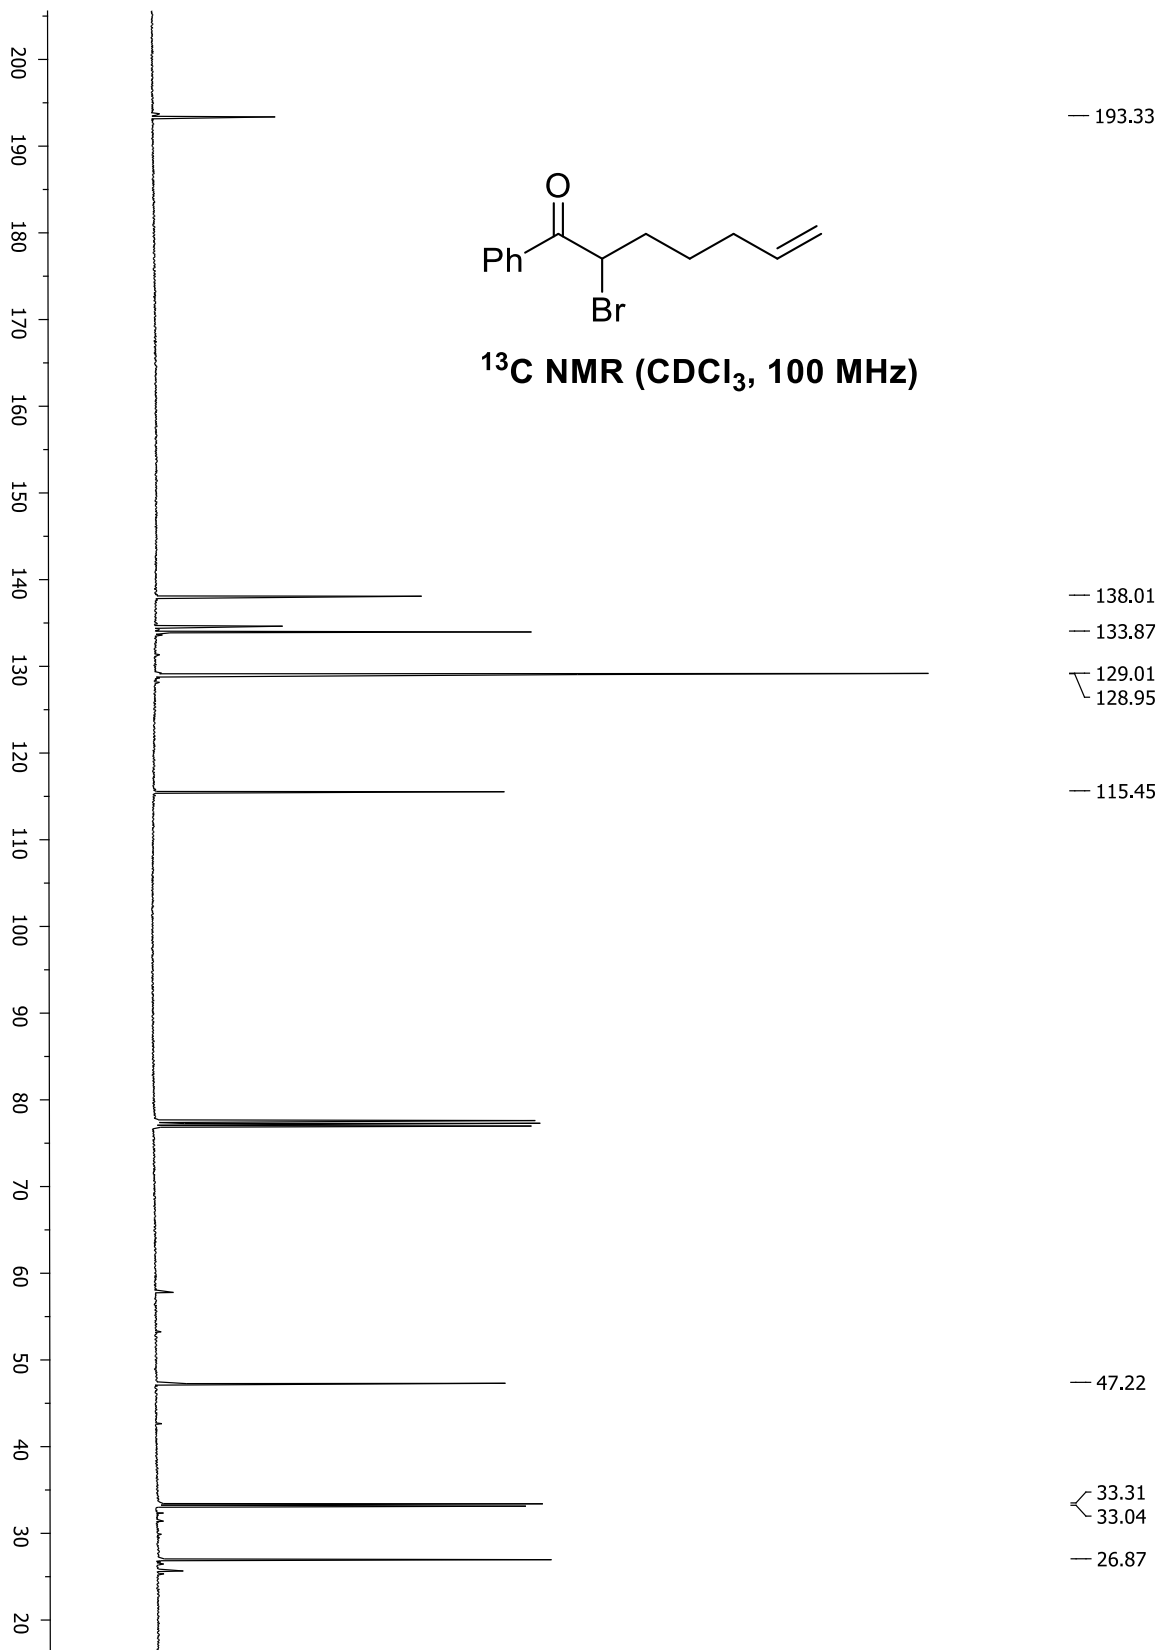

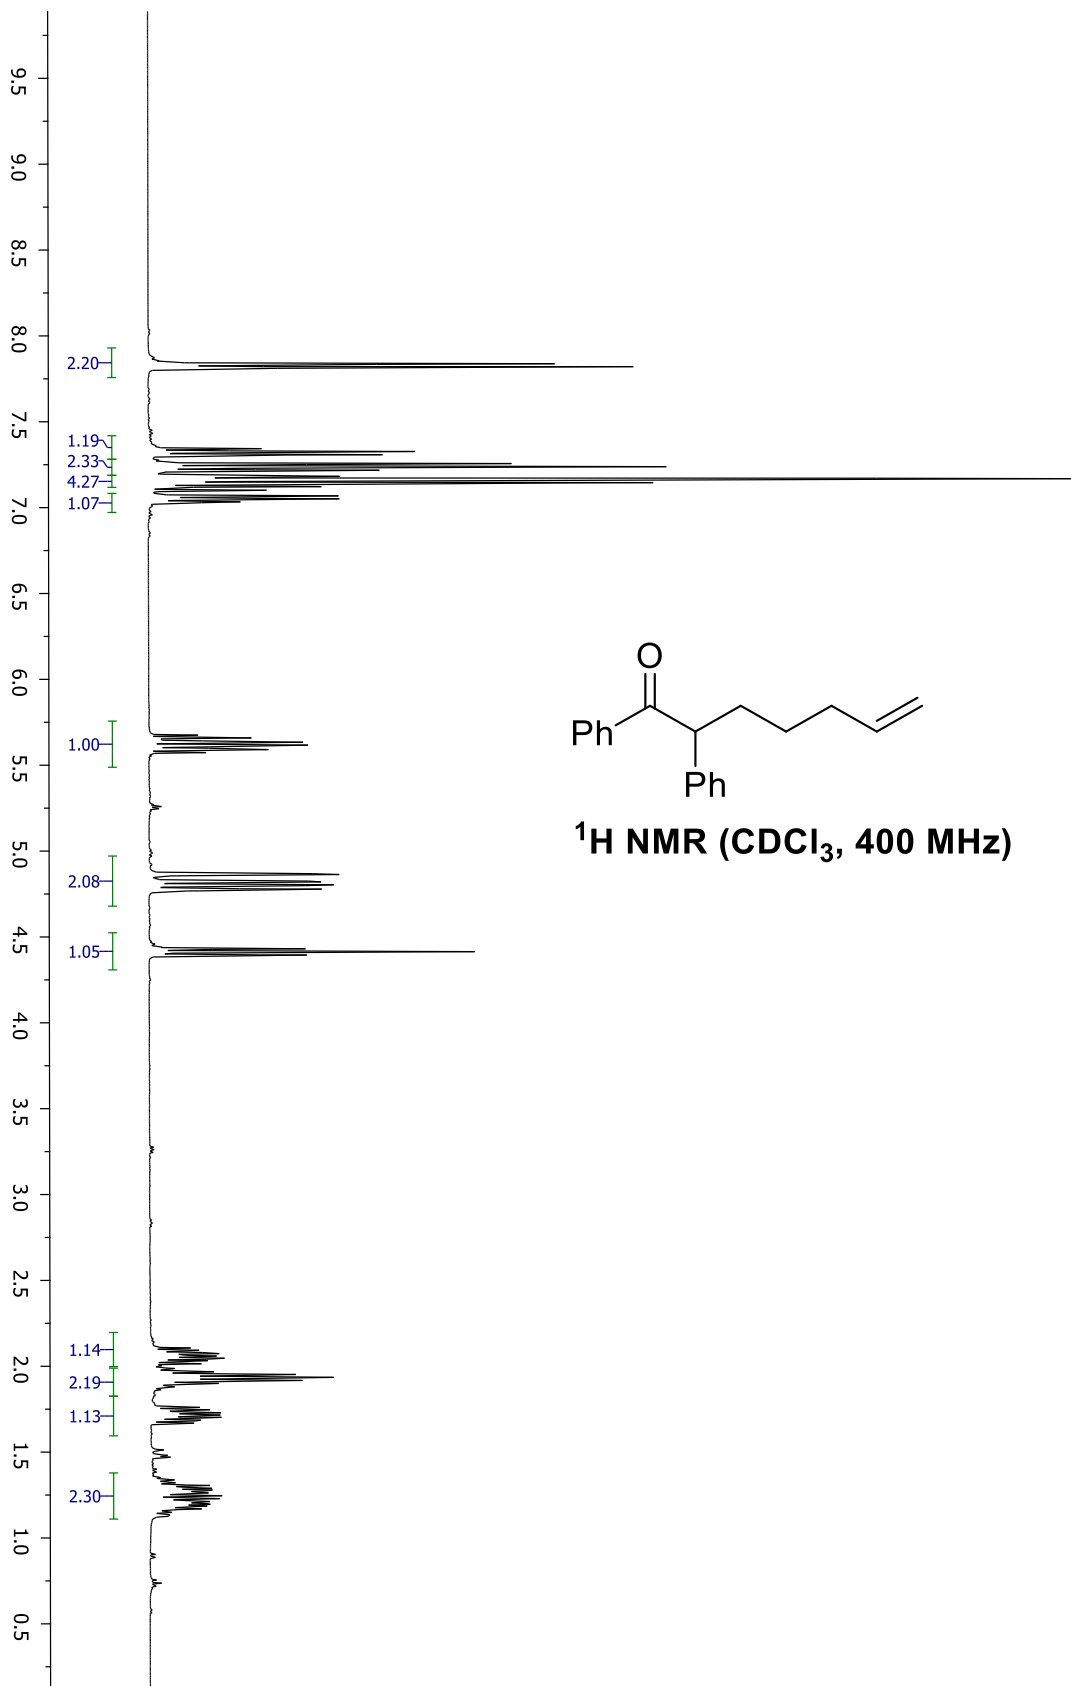

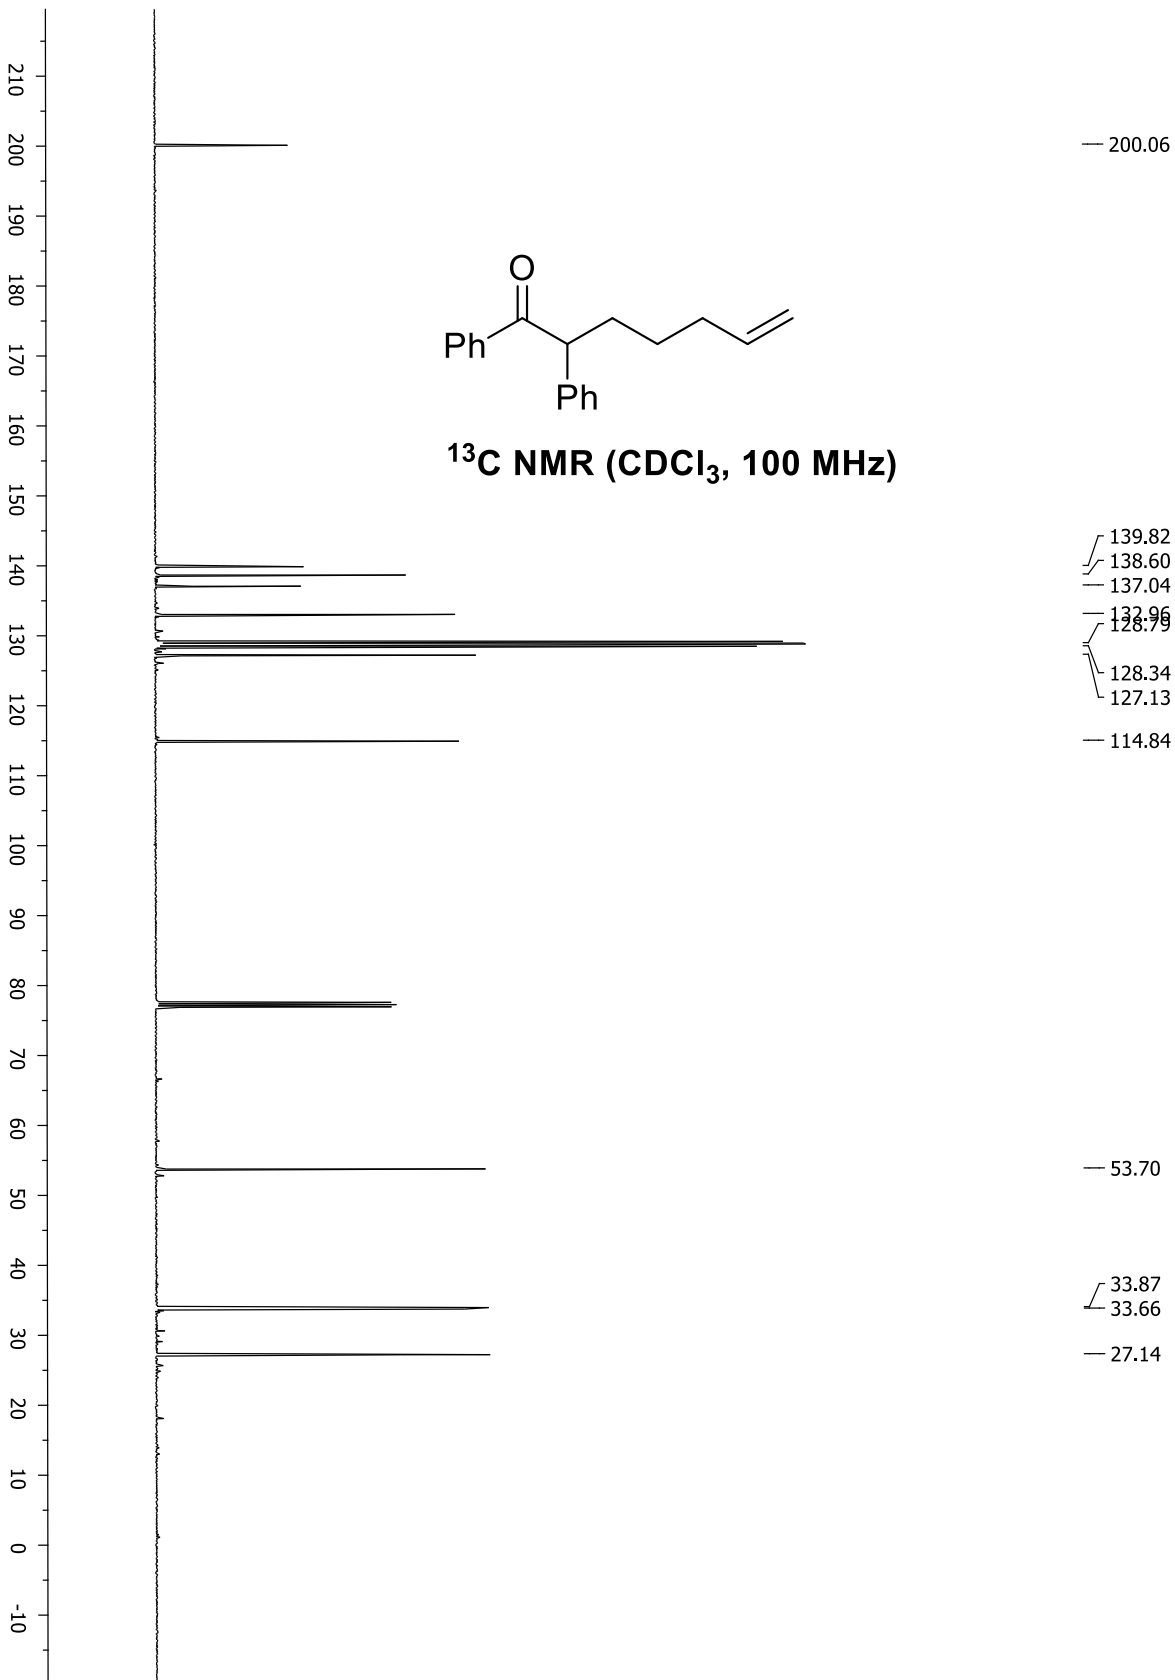

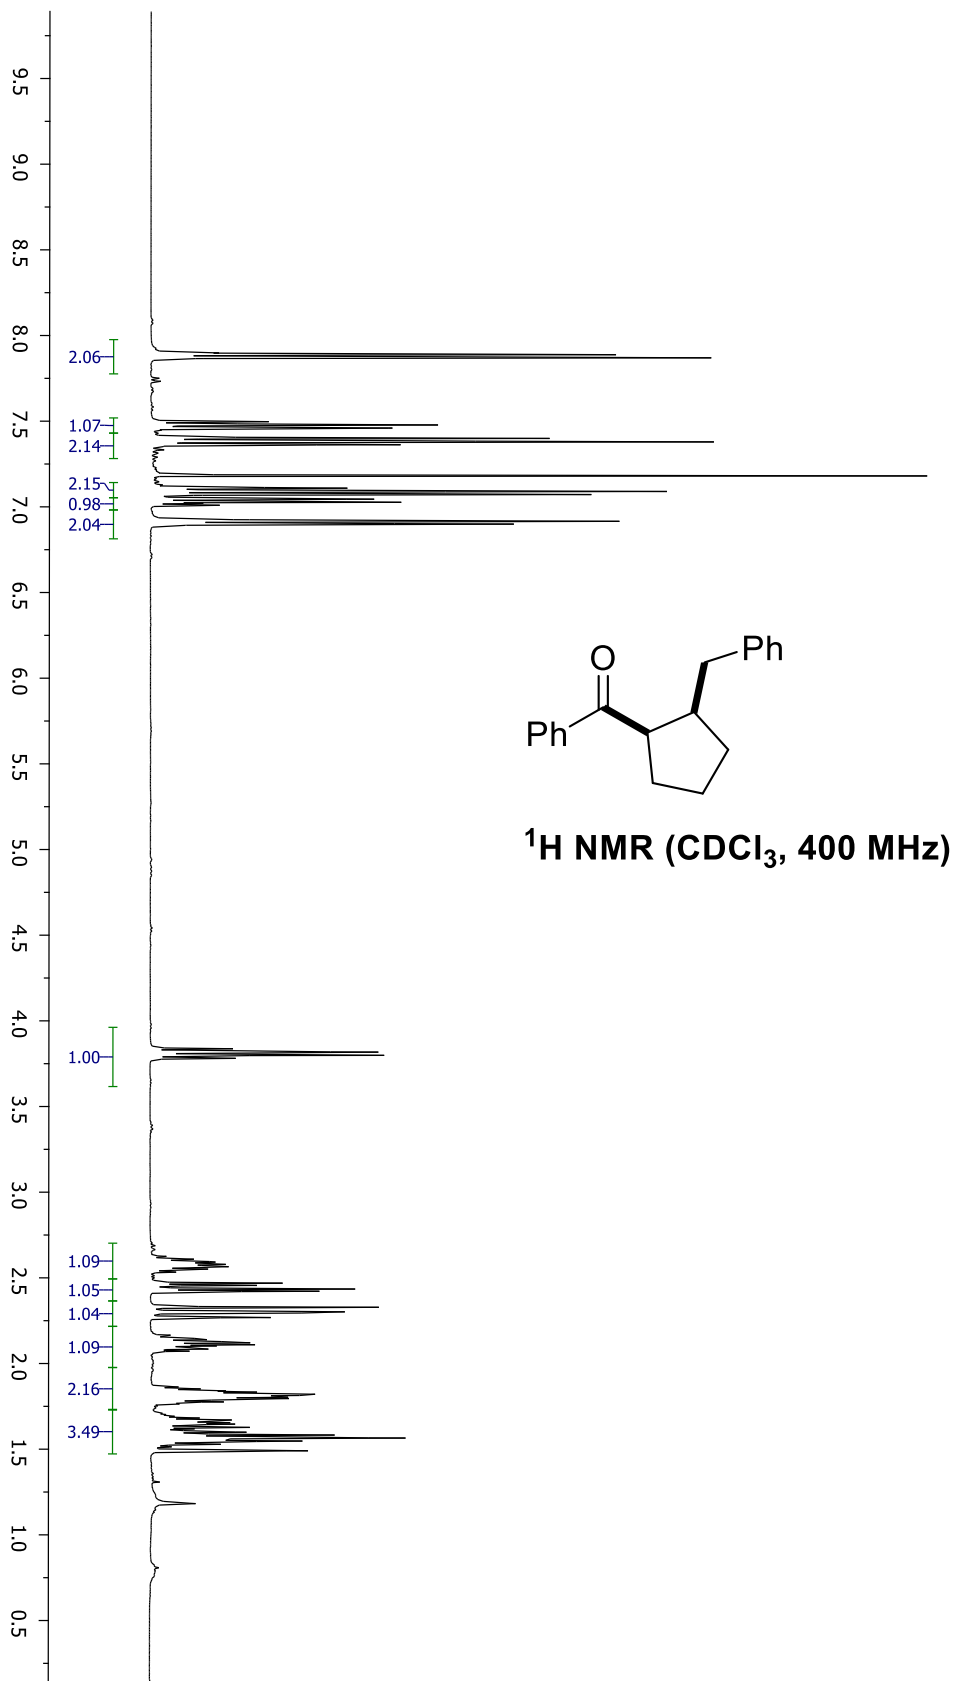



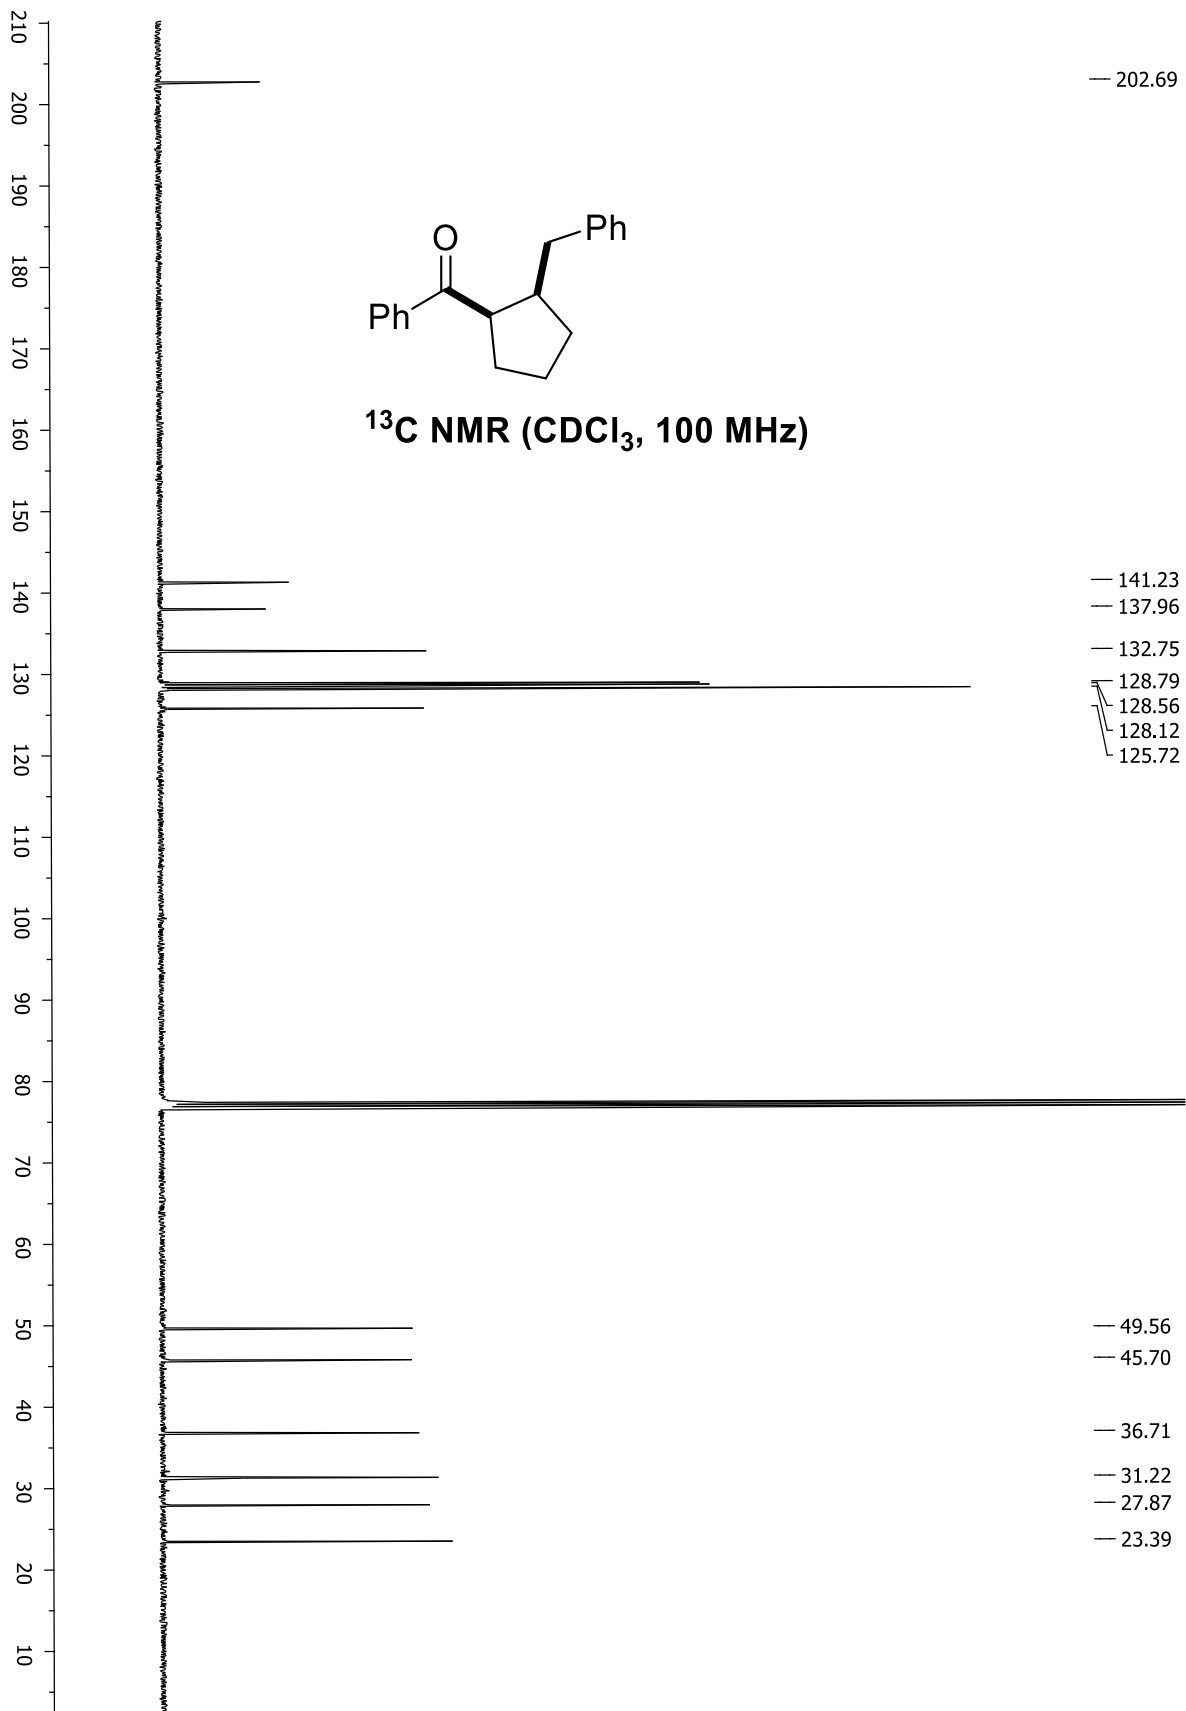

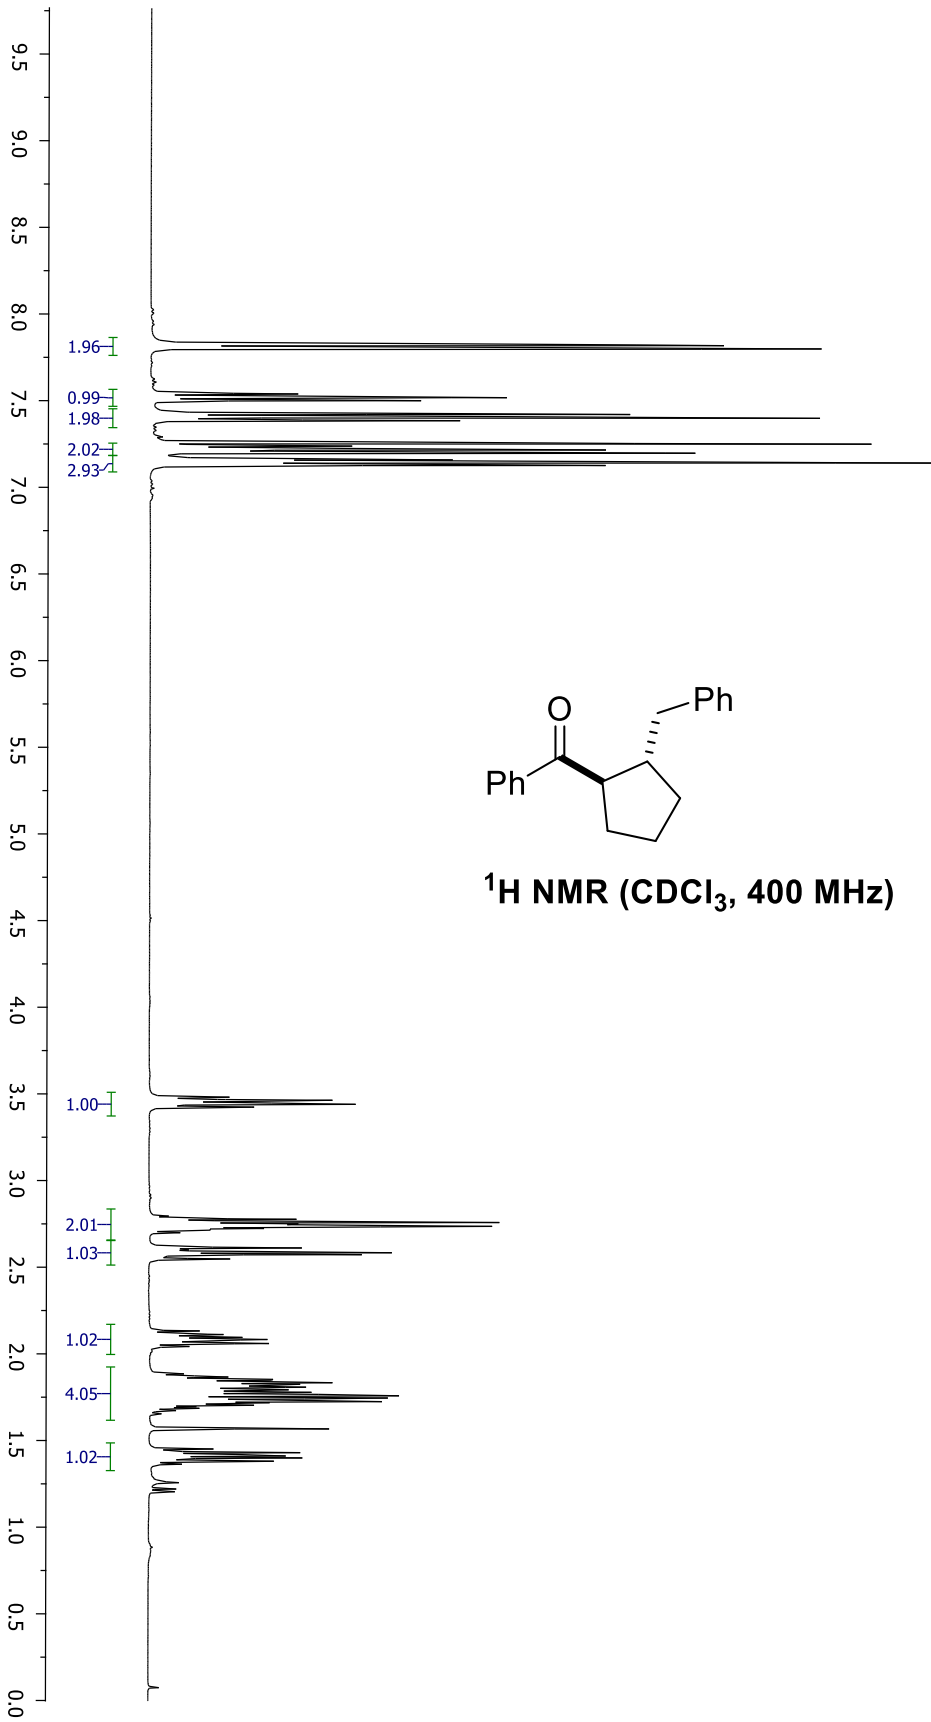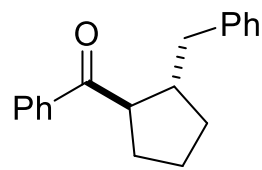

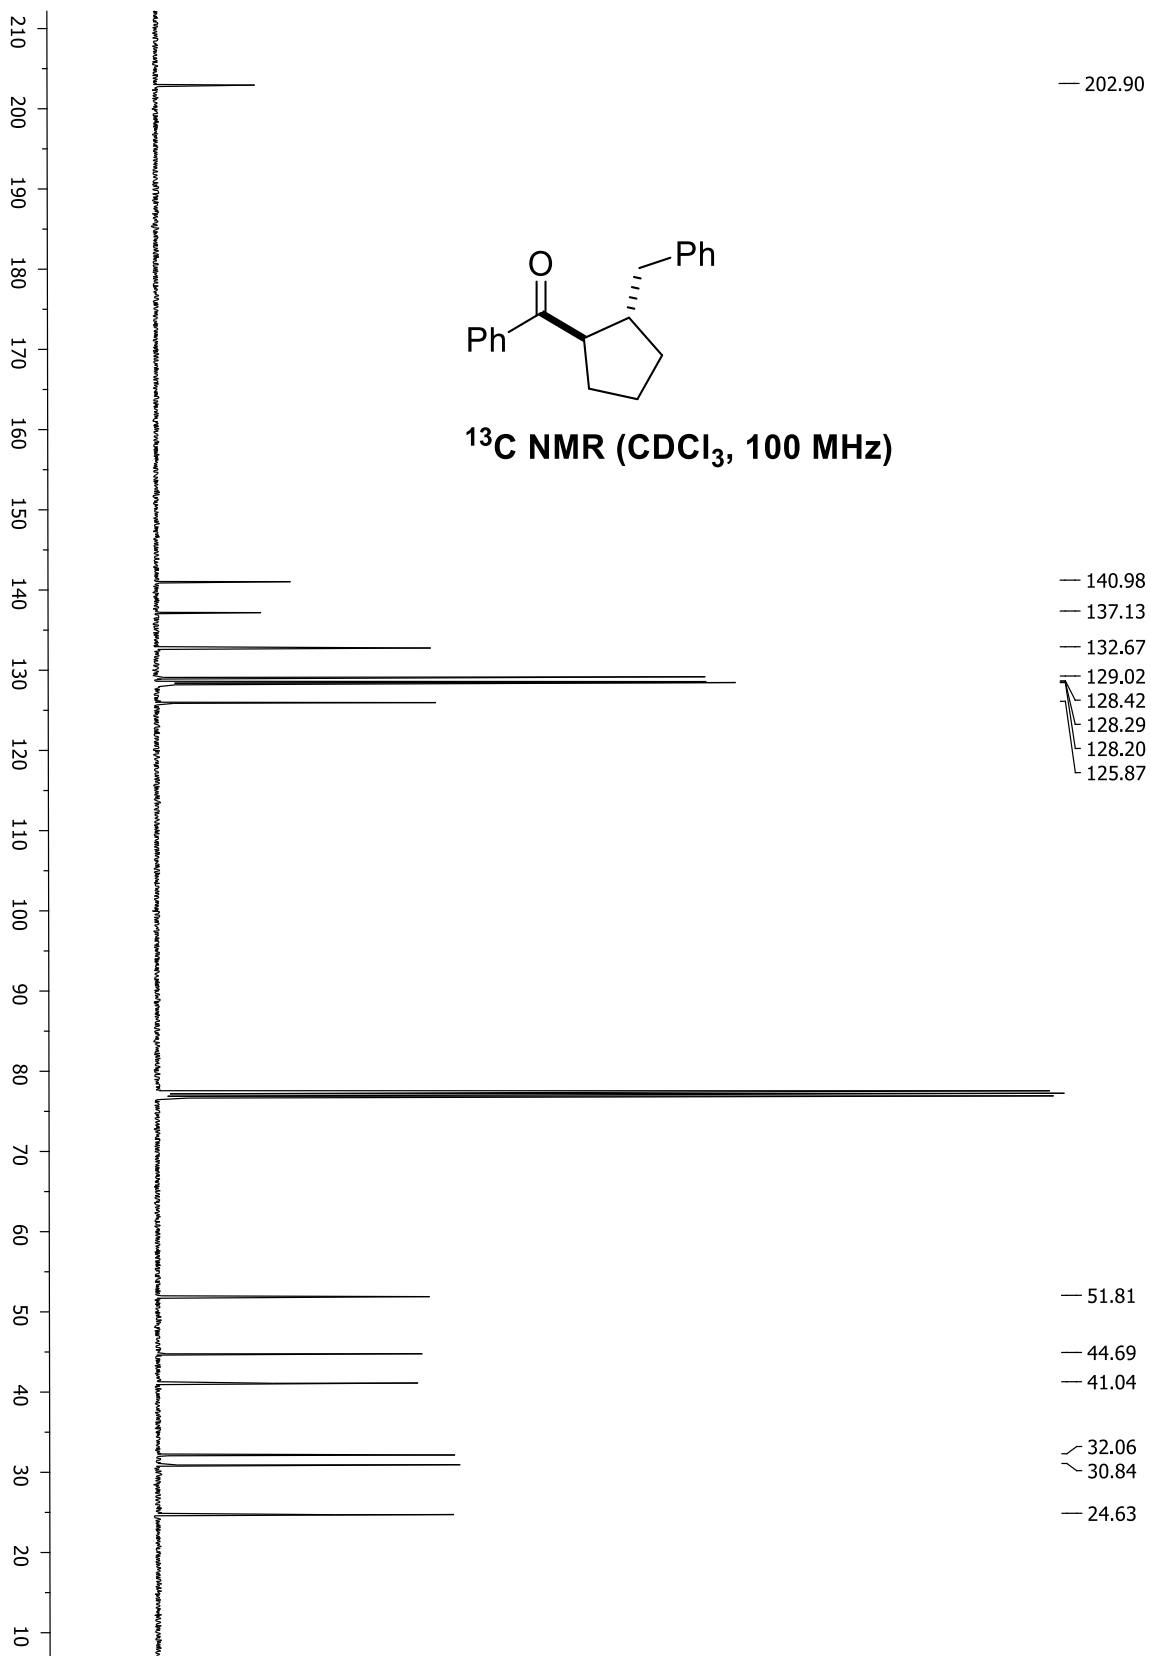

## IX. X-Ray Crystallographic Data

**General Procedure.** A suitable crystal was selected and mounted in a nylon loop. All measurements were made on a Bruker APEX-II CCD diffractometer with filtered Mo-K $\alpha$  radiation at a temperature of 100 K. Using Olex 2,<sup>6</sup> the structure was solved with the XT<sup>7</sup> structure solution program using Direct Methods and refined with the ShelXL<sup>8</sup> refinement package using Least Squares minimization. The absolute stereochemistry was determined on the basis of the absolute structure parameter as well as the known stereochemistry of the ligand.

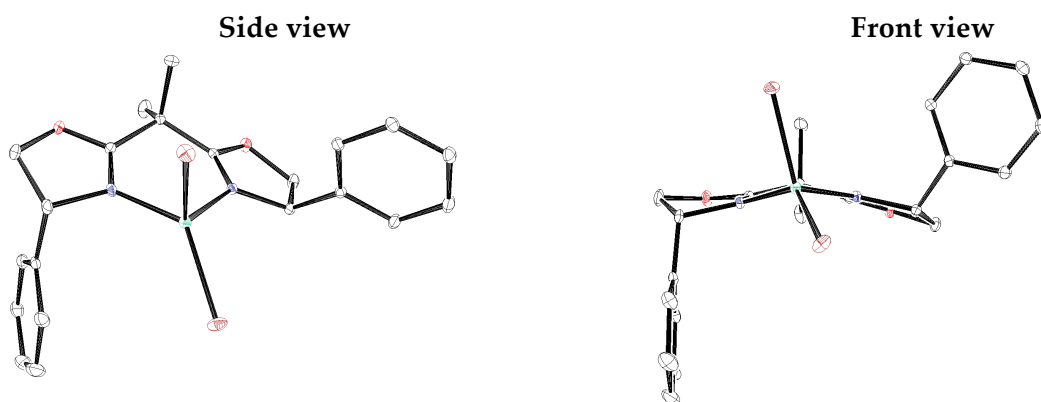

ORTEP plots (side and front views) of Ni<sup>II</sup>Br<sub>2</sub>(Ph-BOX) (1), with thermal ellipsoids at the 30% probability level. Hydrogen atoms have been omitted for clarity.

---

(6) Dolomanov, O. V.; Bourhis, L. J.; Gildea, R. J.; Howard, J. A. K.; Puschmann, H. OLEX2: A Complete Structure Solution, Refinement and Analysis Program. *J. Appl. Cryst.* **2009**, *42*, 339–341.

(7) Sheldrick, G. M. SHELXT - Integrated Space-Group and Crystal-Structure Determination. *Acta Cryst.* **2015**, *A71*, 3–8.

(8) Sheldrick, G. M. Crystal Structure Refinement with SHELXL. *Acta Cryst.* **2015**, *C71*, 3–8.

**Table S-2.** Crystal data and structure refinement for Ni<sup>II</sup>Br<sub>2</sub>(Ph-BOX).

|                                             |                                                                                 |
|---------------------------------------------|---------------------------------------------------------------------------------|
| Identification code                         | (( <i>R,R</i> )-Ph-BOX)Ni <sup>II</sup> Br <sub>2</sub>                         |
| Empirical formula                           | C <sub>21</sub> H <sub>22</sub> Br <sub>2</sub> N <sub>2</sub> NiO <sub>2</sub> |
| Formula weight                              | 552.94                                                                          |
| Temperature/K                               | 100(2)                                                                          |
| Crystal system                              | orthorhombic                                                                    |
| Space group                                 | P2 <sub>1</sub> 2 <sub>1</sub> 2 <sub>1</sub>                                   |
| a/Å                                         | 8.9454(9)                                                                       |
| b/Å                                         | 11.7746(13)                                                                     |
| c/Å                                         | 20.350(3)                                                                       |
| α/°                                         | 90.00                                                                           |
| β/°                                         | 90.00                                                                           |
| γ/°                                         | 90.00                                                                           |
| Volume/Å <sup>3</sup>                       | 2143.4(4)                                                                       |
| Z                                           | 4                                                                               |
| ρ <sub>calc</sub> /g/cm <sup>3</sup>        | 1.713                                                                           |
| μ/mm <sup>-1</sup>                          | 4.652                                                                           |
| F(000)                                      | 1104.0                                                                          |
| Crystal size/mm <sup>3</sup>                | 0.24 × 0.22 × 0.12                                                              |
| Radiation                                   | MoKα (λ = 0.71073)                                                              |
| 2θ range for data collection/°              | 5.3 to 72.72                                                                    |
| Index ranges                                | -14 ≤ h ≤ 14, -19 ≤ k ≤ 19, -33 ≤ l ≤ 33                                        |
| Reflections collected                       | 126446                                                                          |
| Independent reflections                     | 10383 [R <sub>int</sub> = 0.0384, R <sub>sigma</sub> = 0.0227]                  |
| Data/restraints/parameters                  | 10383/0/256                                                                     |
| Goodness-of-fit on F <sup>2</sup>           | 1.043                                                                           |
| Final R indexes [I ≥ 2σ (I)]                | R <sub>1</sub> = 0.0184, wR <sub>2</sub> = 0.0419                               |
| Final R indexes [all data]                  | R <sub>1</sub> = 0.0214, wR <sub>2</sub> = 0.0425                               |
| Largest diff. peak/hole / e Å <sup>-3</sup> | 0.39/-0.90                                                                      |
| Flack parameter                             | 0.000(3)                                                                        |

**Table S-3.** Fractional atomic coordinates ( $\times 10^4$ ) and equivalent isotropic displacement parameters ( $\text{\AA}^2 \times 10^3$ ) for  $\text{Ni}^{\text{II}}\text{Br}_2(\text{Ph-BOX})$ .  $U_{\text{eq}}$  is defined as 1/3 of the trace of the orthogonalised  $U_{ij}$  tensor.

| Atom  | $x$         | $y$         | $z$        | $U(\text{eq})$ |
|-------|-------------|-------------|------------|----------------|
| Br(1) | 2548.12(13) | 1500.98(9)  | 6369.74(6) | 21.18(2)       |
| Br(2) | 6135.42(11) | 3425.55(10) | 6016.47(6) | 22.16(2)       |
| Ni(1) | 3598.53(13) | 3347.18(10) | 6288.33(6) | 12.47(2)       |
| O(1)  | -450.5(9)   | 4842.0(8)   | 5834.1(4)  | 21.13(16)      |
| O(2)  | 2208.0(9)   | 5477.3(7)   | 7779.3(4)  | 16.02(13)      |
| N(1)  | 1846.1(10)  | 4095.5(7)   | 5880.3(4)  | 13.41(14)      |
| N(2)  | 3296.1(9)   | 4227.8(7)   | 7105.8(4)  | 11.26(13)      |
| C(1)  | 1444.1(13)  | 4080.5(10)  | 5163.3(5)  | 17.45(18)      |
| C(2)  | -239.6(14)  | 4296.5(13)  | 5193.1(6)  | 26.0(2)        |
| C(3)  | 759.1(10)   | 4565.2(8)   | 6186.8(5)  | 13.79(16)      |
| C(4)  | 630.8(11)   | 4807.1(9)   | 6914.3(5)  | 13.84(16)      |
| C(5)  | -303.1(13)  | 3836.7(12)  | 7220.4(6)  | 26.0(2)        |
| C(6)  | -150.3(14)  | 5954.7(12)  | 7020.1(7)  | 25.9(2)        |
| C(7)  | 2132.5(10)  | 4816.4(8)   | 7250.2(5)  | 11.40(14)      |
| C(8)  | 3740.4(12)  | 5398.7(9)   | 8028.0(5)  | 17.11(17)      |
| C(9)  | 4459.4(11)  | 4451.9(8)   | 7609.7(5)  | 12.01(15)      |
| C(10) | 2363.5(12)  | 4977.0(9)   | 4819.0(5)  | 14.90(16)      |
| C(11) | 3737.5(14)  | 4687.2(11)  | 4542.1(6)  | 22.7(2)        |
| C(12) | 4647.5(15)  | 5520.0(13)  | 4264.2(7)  | 30.7(3)        |
| C(13) | 4186.1(15)  | 6640.2(13)  | 4262.9(7)  | 29.7(3)        |
| C(14) | 2815.8(15)  | 6936.3(11)  | 4531.2(6)  | 24.1(2)        |
| C(15) | 1909.5(12)  | 6108.4(10)  | 4806.8(5)  | 18.06(19)      |
| C(16) | 4863.7(9)   | 3407.5(8)   | 8002.7(5)  | 11.79(14)      |
| C(17) | 3930.1(11)  | 2464.2(8)   | 8050.6(5)  | 14.26(16)      |
| C(18) | 4308.1(11)  | 1564.0(9)   | 8461.1(5)  | 15.96(16)      |
| C(19) | 5611.9(12)  | 1598.1(10)  | 8831.7(5)  | 18.47(17)      |
| C(20) | 6551.7(13)  | 2535.6(11)  | 8781.4(6)  | 23.5(2)        |
| C(21) | 6187.5(11)  | 3432.8(10)  | 8366.1(6)  | 19.47(17)      |

**Table S-4.** Anisotropic displacement parameters ( $\text{\AA}^2 \times 10^3$ ) for  $\text{Ni}^{\text{II}}\text{Br}_2(\text{Ph-BOX})$ . The anisotropic displacement factor exponent takes the form:  $-2\pi^2[h^2a^*2U_{11}+2hka^*b^*U_{12}+\dots]$ .

| Atom  | $U_{11}$ | $U_{22}$ | $U_{33}$ | $U_{23}$  | $U_{13}$ | $U_{12}$ |
|-------|----------|----------|----------|-----------|----------|----------|
| Br(1) | 28.50(5) | 12.19(4) | 22.85(5) | -0.96(3)  | 0.04(4)  | -2.29(4) |
| Br(2) | 14.90(4) | 24.04(5) | 27.52(5) | -11.00(4) | 5.78(4)  | -2.35(4) |
| Ni(1) | 13.88(5) | 12.20(5) | 11.32(5) | -2.64(4)  | 0.74(4)  | 1.18(4)  |
| O(1)  | 12.5(3)  | 35.4(5)  | 15.4(3)  | 2.1(3)    | -3.8(3)  | -1.5(3)  |
| O(2)  | 17.2(3)  | 17.9(3)  | 13.0(3)  | -5.4(3)   | -1.0(3)  | 4.0(3)   |
| N(1)  | 16.5(3)  | 14.1(3)  | 9.7(3)   | -0.4(3)   | -1.5(3)  | -1.7(3)  |
| N(2)  | 12.0(3)  | 12.0(3)  | 9.8(3)   | -0.4(3)   | -0.3(2)  | 0.5(2)   |
| C(1)  | 21.7(5)  | 20.1(4)  | 10.6(4)  | -3.8(3)   | -3.5(3)  | -4.5(4)  |
| C(2)  | 21.0(5)  | 41.2(7)  | 15.8(5)  | -2.0(5)   | -7.0(4)  | -10.5(5) |
| C(3)  | 12.6(3)  | 15.5(4)  | 13.2(4)  | 0.9(3)    | -2.0(3)  | -2.1(3)  |
| C(4)  | 11.1(3)  | 18.7(4)  | 11.7(4)  | 1.1(3)    | 0.6(3)   | 1.4(3)   |
| C(5)  | 19.0(5)  | 39.7(7)  | 19.2(5)  | 8.1(5)    | 1.5(4)   | -10.7(4) |
| C(6)  | 23.1(5)  | 31.6(6)  | 23.2(5)  | -4.7(5)   | -3.8(4)  | 15.4(5)  |
| C(7)  | 13.6(3)  | 11.3(3)  | 9.3(3)   | 0.3(3)    | 1.0(3)   | 0.4(3)   |
| C(8)  | 19.8(4)  | 15.5(4)  | 16.1(4)  | -4.7(3)   | -5.1(4)  | 2.4(3)   |
| C(9)  | 12.1(3)  | 12.6(4)  | 11.3(4)  | 0.0(3)    | -0.7(3)  | -1.3(3)  |
| C(10) | 16.9(4)  | 19.3(4)  | 8.5(4)   | -0.6(3)   | -2.1(3)  | 0.7(3)   |
| C(11) | 23.2(5)  | 27.1(5)  | 17.8(5)  | 0.7(4)    | 2.8(4)   | 8.6(4)   |
| C(12) | 24.6(6)  | 41.6(7)  | 25.9(6)  | 5.1(5)    | 10.4(5)  | 5.7(5)   |
| C(13) | 29.2(6)  | 36.2(7)  | 23.6(6)  | 12.1(5)   | 3.8(4)   | -3.2(5)  |
| C(14) | 29.5(6)  | 23.1(5)  | 19.6(5)  | 7.6(4)    | -3.7(4)  | 2.5(4)   |
| C(15) | 18.4(4)  | 21.8(5)  | 14.0(4)  | 0.3(4)    | -2.1(3)  | 4.6(4)   |
| C(16) | 11.5(3)  | 12.5(3)  | 11.3(4)  | -0.1(3)   | -0.1(3)  | 1.4(3)   |
| C(17) | 15.3(4)  | 14.3(4)  | 13.2(4)  | 1.0(3)    | -1.0(3)  | -1.4(3)  |
| C(18) | 19.9(4)  | 13.2(4)  | 14.7(4)  | 0.8(3)    | 0.0(3)   | -0.2(3)  |
| C(19) | 20.4(4)  | 16.4(4)  | 18.6(4)  | 3.7(4)    | -1.5(3)  | 5.0(4)   |
| C(20) | 18.6(4)  | 25.5(5)  | 26.4(6)  | 7.7(4)    | -8.6(4)  | 0.0(4)   |
| C(21) | 14.1(4)  | 19.8(4)  | 24.5(5)  | 5.9(4)    | -6.0(3)  | -2.2(4)  |

**Table S-5.** Bond lengths /Å for Ni<sup>II</sup>Br<sub>2</sub>(Ph-BOX).

|       |       |            |       |       |            |
|-------|-------|------------|-------|-------|------------|
| Br(1) | Ni(1) | 2.3740(3)  | C(4)  | C(6)  | 1.5364(16) |
| Br(2) | Ni(1) | 2.3376(3)  | C(4)  | C(7)  | 1.5073(13) |
| Ni(1) | N(1)  | 1.9808(9)  | C(8)  | C(9)  | 1.5431(14) |
| Ni(1) | N(2)  | 1.9788(8)  | C(9)  | C(16) | 1.5108(13) |
| O(1)  | C(2)  | 1.4663(16) | C(10) | C(11) | 1.3944(16) |
| O(1)  | C(3)  | 1.3387(12) | C(10) | C(15) | 1.3930(16) |
| O(2)  | C(7)  | 1.3303(12) | C(11) | C(12) | 1.3944(19) |
| O(2)  | C(8)  | 1.4641(13) | C(12) | C(13) | 1.382(2)   |
| N(1)  | C(1)  | 1.5028(13) | C(13) | C(14) | 1.3865(19) |
| N(1)  | C(3)  | 1.2808(13) | C(14) | C(15) | 1.3864(17) |
| N(2)  | C(7)  | 1.2845(12) | C(16) | C(17) | 1.3931(13) |
| N(2)  | C(9)  | 1.4846(12) | C(16) | C(21) | 1.3965(13) |
| C(1)  | C(2)  | 1.5286(17) | C(17) | C(18) | 1.3913(14) |
| C(1)  | C(10) | 1.5105(15) | C(18) | C(19) | 1.3895(14) |
| C(3)  | C(4)  | 1.5120(14) | C(19) | C(20) | 1.3914(17) |
| C(4)  | C(5)  | 1.5464(16) | C(20) | C(21) | 1.3916(16) |



**Table S-6.** Bond angles /° for Ni<sup>II</sup>Br<sub>2</sub>(Ph-BOX).

|                   |            |                   |            |
|-------------------|------------|-------------------|------------|
| Br(2) Ni(1) Br(1) | 115.907(7) | C(7) C(4) C(5)    | 107.71(8)  |
| N(1) Ni(1) Br(1)  | 97.09(3)   | C(7) C(4) C(6)    | 109.60(9)  |
| N(1) Ni(1) Br(2)  | 130.66(3)  | O(2) C(7) C(4)    | 114.62(8)  |
| N(2) Ni(1) Br(1)  | 111.54(3)  | N(2) C(7) O(2)    | 117.36(8)  |
| N(2) Ni(1) Br(2)  | 108.12(2)  | N(2) C(7) C(4)    | 127.92(9)  |
| N(2) Ni(1) N(1)   | 90.64(3)   | O(2) C(8) C(9)    | 104.20(8)  |
| C(3) O(1) C(2)    | 105.45(9)  | N(2) C(9) C(8)    | 102.55(8)  |
| C(7) O(2) C(8)    | 106.88(7)  | N(2) C(9) C(16)   | 112.88(8)  |
| C(1) N(1) Ni(1)   | 126.24(7)  | C(16) C(9) C(8)   | 113.32(8)  |
| C(3) N(1) Ni(1)   | 126.07(7)  | C(11) C(10) C(1)  | 119.76(10) |
| C(3) N(1) C(1)    | 107.23(9)  | C(15) C(10) C(1)  | 121.19(10) |
| C(7) N(2) Ni(1)   | 125.86(7)  | C(15) C(10) C(11) | 118.93(10) |
| C(7) N(2) C(9)    | 108.31(8)  | C(12) C(11) C(10) | 120.43(11) |
| C(9) N(2) Ni(1)   | 125.31(6)  | C(13) C(12) C(11) | 119.84(11) |
| N(1) C(1) C(2)    | 101.27(9)  | C(12) C(13) C(14) | 120.22(12) |
| N(1) C(1) C(10)   | 108.17(8)  | C(15) C(14) C(13) | 119.97(12) |
| C(10) C(1) C(2)   | 116.02(10) | C(14) C(15) C(10) | 120.61(11) |
| O(1) C(2) C(1)    | 103.58(8)  | C(17) C(16) C(9)  | 122.86(8)  |
| O(1) C(3) C(4)    | 114.69(8)  | C(17) C(16) C(21) | 119.23(9)  |
| N(1) C(3) O(1)    | 117.23(9)  | C(21) C(16) C(9)  | 117.77(9)  |
| N(1) C(3) C(4)    | 128.01(9)  | C(18) C(17) C(16) | 120.25(9)  |
| C(3) C(4) C(5)    | 107.23(9)  | C(19) C(18) C(17) | 120.52(10) |
| C(3) C(4) C(6)    | 109.72(9)  | C(18) C(19) C(20) | 119.35(10) |
| C(6) C(4) C(5)    | 110.35(10) | C(19) C(20) C(21) | 120.37(10) |
| C(7) C(4) C(3)    | 112.19(8)  | C(20) C(21) C(16) | 120.26(10) |

**Table S-7.** Hydrogen atom coordinates ( $\text{\AA}\times 10^4$ ) and isotropic displacement parameters ( $\text{\AA}^2\times 10^3$ ) for  $\text{Ni}^{\text{II}}\text{Br}_2(\text{Ph-BOX})$ .

| Atom  | <i>x</i> | <i>y</i> | <i>z</i> | U(eq) |
|-------|----------|----------|----------|-------|
| H(1)  | 1650     | 3315     | 4971     | 21    |
| H(2A) | -563     | 4803     | 4832     | 31    |
| H(2B) | -806     | 3575     | 5166     | 31    |
| H(5A) | -1317    | 3853     | 7038     | 39    |
| H(5B) | -349     | 3937     | 7698     | 39    |
| H(5C) | 165      | 3105     | 7119     | 39    |
| H(6A) | 517      | 6570     | 6882     | 39    |
| H(6B) | -396     | 6045     | 7486     | 39    |
| H(6C) | -1070    | 5981     | 6759     | 39    |
| H(8A) | 3748     | 5195     | 8500     | 21    |
| H(8B) | 4277     | 6127     | 7969     | 21    |
| H(9)  | 5377     | 4755     | 7390     | 14    |
| H(11) | 4056     | 3917     | 4543     | 27    |
| H(12) | 5583     | 5318     | 4076     | 37    |
| H(13) | 4810     | 7209     | 4077     | 36    |
| H(14) | 2498     | 7706     | 4526     | 29    |
| H(15) | 970      | 6315     | 4989     | 22    |
| H(17) | 3032     | 2435     | 7802     | 17    |
| H(18) | 3670     | 921      | 8488     | 19    |
| H(19) | 5859     | 987      | 9117     | 22    |
| H(20) | 7447     | 2563     | 9032     | 28    |
| H(21) | 6842     | 4065     | 8330     | 23    |

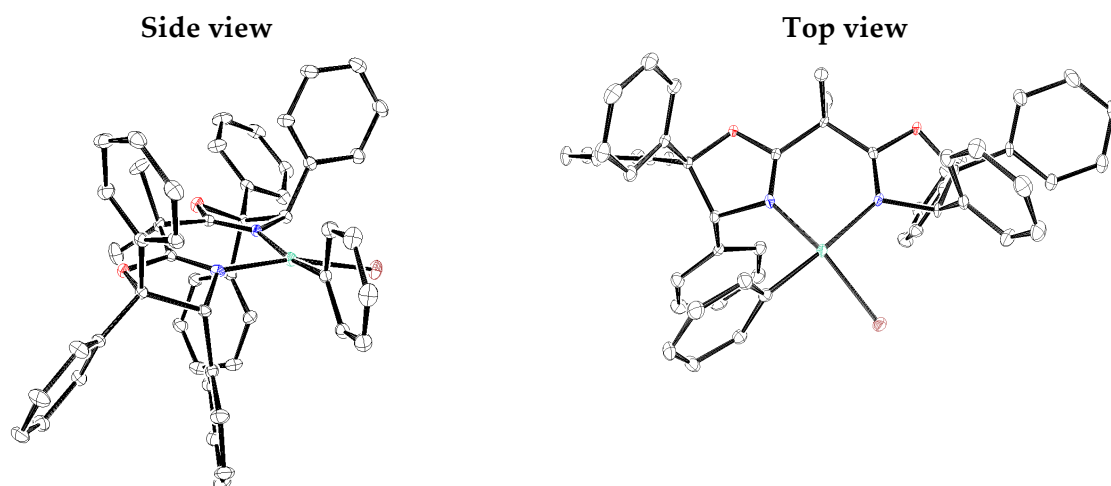

ORTEP plots (side and top views) of Ni<sup>II</sup>PhBr(Ph-BOX<sup>Ph</sup>) (**2<sup>Ph</sup>**), with thermal ellipsoids at the 30% probability level. Interstitial THF molecule and hydrogen atoms have been omitted for clarity.

**Table S-8.** Crystal data and structure refinement for Ni<sup>II</sup>PhBr(Ph-BOX<sup>Ph</sup>).

|                                                              |                                                                              |
|--------------------------------------------------------------|------------------------------------------------------------------------------|
| Identification code                                          | (( <i>R,R</i> )-Ph-BOX <sup>Ph</sup> )Ni <sup>II</sup> PhBr                  |
| Empirical formula                                            | C <sub>55</sub> H <sub>51</sub> BrN <sub>2</sub> NiO <sub>3</sub>            |
| Formula weight                                               | 926.60                                                                       |
| Temperature/K                                                | 100(2)                                                                       |
| Crystal system                                               | orthorhombic                                                                 |
| Space group                                                  | P2 <sub>1</sub> 2 <sub>1</sub> 2 <sub>1</sub>                                |
| <i>a</i> /Å                                                  | 9.7540(5)                                                                    |
| <i>b</i> /Å                                                  | 17.1117(16)                                                                  |
| <i>c</i> /Å                                                  | 26.830(3)                                                                    |
| $\alpha$ /°                                                  | 90.00                                                                        |
| $\beta$ /°                                                   | 90.00                                                                        |
| $\gamma$ /°                                                  | 90.00                                                                        |
| Volume/Å <sup>3</sup>                                        | 4478.2(7)                                                                    |
| <i>Z</i>                                                     | 4                                                                            |
| $\rho_{\text{calc}}/\text{cm}^3$                             | 1.374                                                                        |
| $\mu/\text{mm}^{-1}$                                         | 2.036                                                                        |
| <i>F</i> (000)                                               | 1928.0                                                                       |
| Crystal size/mm <sup>3</sup>                                 | 0.14 × 0.08 × 0.05                                                           |
| Radiation                                                    | CuK $\alpha$ ( $\lambda$ = 1.54184)                                          |
| 2 $\Theta$ range for data collection/°                       | 6.12 to 145.54                                                               |
| Index ranges                                                 | -12 ≤ <i>h</i> ≤ 12, -21 ≤ <i>k</i> ≤ 15, -33 ≤ <i>l</i> ≤ 29                |
| Reflections collected                                        | 32200                                                                        |
| Independent reflections                                      | 8614 [ <i>R</i> <sub>int</sub> = 0.0475, <i>R</i> <sub>sigma</sub> = 0.0415] |
| Data/restraints/parameters                                   | 8614/0/562                                                                   |
| Goodness-of-fit on <i>F</i> <sup>2</sup>                     | 1.029                                                                        |
| Final <i>R</i> indexes [ <i>I</i> ≥ 2 $\sigma$ ( <i>I</i> )] | <i>R</i> <sub>1</sub> = 0.0452, <i>wR</i> <sub>2</sub> = 0.1112              |
| Final <i>R</i> indexes [all data]                            | <i>R</i> <sub>1</sub> = 0.0501, <i>wR</i> <sub>2</sub> = 0.1144              |
| Largest diff. peak/hole / e Å <sup>-3</sup>                  | 1.55/-0.60                                                                   |
| Flack parameter                                              | 0.00(2)                                                                      |

**Table S–9.** Fractional atomic coordinates ( $\times 10^4$ ) and equivalent isotropic displacement parameters ( $\text{\AA}^2 \times 10^3$ ) for  $\text{Ni}^{\text{II}}\text{PhBr}(\text{Ph-BOX}^{\text{Ph}})$ .  $U_{\text{eq}}$  is defined as 1/3 of the trace of the orthogonalised  $U_{ij}$  tensor.

| Atom  | $x$       | $y$        | $z$         | $U(\text{eq})$ |
|-------|-----------|------------|-------------|----------------|
| Br(1) | 7939.4(4) | 5185.3(2)  | 4145.79(17) | 24.92(10)      |
| Ni(1) | 6269.1(6) | 4236.2(3)  | 4073.1(2)   | 16.19(14)      |
| O(1)  | 2735(3)   | 5212.5(14) | 4693.0(9)   | 18.7(5)        |
| O(2)  | 2885(3)   | 2915.7(13) | 3709.6(9)   | 15.3(5)        |
| N(1)  | 4807(3)   | 4850.7(18) | 4410(1)     | 14.9(6)        |
| N(2)  | 4900(3)   | 3521.3(17) | 3836.5(11)  | 16.4(6)        |
| C(1)  | 7684(4)   | 3549(2)    | 3853.6(14)  | 19.4(8)        |
| C(2)  | 8274(4)   | 3573(2)    | 3383.0(14)  | 21.9(8)        |
| C(3)  | 9178(4)   | 2982(3)    | 3232.7(16)  | 29.6(10)       |
| C(4)  | 9518(5)   | 2387(2)    | 3563.7(17)  | 30.3(10)       |
| C(5)  | 8987(4)   | 2382(2)    | 4029.9(18)  | 32.2(10)       |
| C(6)  | 8047(4)   | 2957(2)    | 4176.0(15)  | 25.7(8)        |
| C(7)  | 3546(4)   | 4681.0(19) | 4461.2(13)  | 14.9(7)        |
| C(8)  | 3541(4)   | 5948.0(19) | 4665.8(13)  | 16.4(7)        |
| C(9)  | 5011(4)   | 5618(2)    | 4674.3(13)  | 16.1(7)        |
| C(10) | 5595(4)   | 5484(2)    | 5190.9(14)  | 19.5(8)        |
| C(11) | 5199(4)   | 4868(3)    | 5495.0(14)  | 25.7(8)        |
| C(12) | 5727(5)   | 4798(3)    | 5971.0(15)  | 30.7(9)        |
| C(13) | 6677(5)   | 5328(3)    | 6147.9(16)  | 32.8(10)       |
| C(14) | 7074(5)   | 5947(3)    | 5847.5(16)  | 33.6(9)        |
| C(15) | 6552(4)   | 6026(2)    | 5373.8(16)  | 27.4(9)        |
| C(16) | 3129(4)   | 6312.4(19) | 4165.7(14)  | 18.8(7)        |
| C(17) | 3925(4)   | 6248(2)    | 3740.1(14)  | 23.1(8)        |
| C(18) | 3437(5)   | 6524(3)    | 3288.8(16)  | 29.0(9)        |
| C(19) | 2147(5)   | 6858(3)    | 3255.9(16)  | 32.7(9)        |
| C(20) | 1356(4)   | 6937(3)    | 3683.9(15)  | 29.8(9)        |
| C(21) | 1838(4)   | 6661(2)    | 4132.3(16)  | 26.6(8)        |
| C(22) | 3156(4)   | 6466(2)    | 5101.6(13)  | 17.8(7)        |
| C(23) | 3722(4)   | 7218(2)    | 5123.3(15)  | 24.6(8)        |
| C(24) | 3354(4)   | 7724(2)    | 5499.4(16)  | 27.5(9)        |
| C(25) | 2429(4)   | 7493(2)    | 5861.3(17)  | 32.1(10)       |
| C(26) | 1899(5)   | 6749(3)    | 5849.0(17)  | 36.5(10)       |
| C(27) | 2266(5)   | 6234(2)    | 5471.0(15)  | 29.4(9)        |
| C(28) | 2777(4)   | 3962(2)    | 4294.6(13)  | 17.5(7)        |

|        |          |         |            |          |
|--------|----------|---------|------------|----------|
| C(29)  | 1449(4)  | 4220(3) | 4031.5(18) | 34.8(10) |
| C(30)  | 2433(5)  | 3454(3) | 4758.3(16) | 35.4(11) |
| C(31)  | 3618(4)  | 3478(2) | 3944.6(12) | 14.0(7)  |
| C(32)  | 3892(4)  | 2401(2) | 3465.8(13) | 15.0(7)  |
| C(33)  | 5122(4)  | 2976(2) | 3407.4(13) | 15.9(7)  |
| C(34)  | 5175(4)  | 3445(2) | 2926.8(14) | 17.9(7)  |
| C(35)  | 4606(4)  | 4188(2) | 2878.3(15) | 23.8(8)  |
| C(36)  | 4665(5)  | 4569(3) | 2419.5(16) | 30.8(10) |
| C(37)  | 5257(5)  | 4217(3) | 2012.6(16) | 30.6(9)  |
| C(38)  | 5824(5)  | 3485(3) | 2059.8(15) | 31.3(10) |
| C(39)  | 5795(4)  | 3102(2) | 2513.7(14) | 25.7(9)  |
| C(40)  | 3236(4)  | 2096(2) | 2989.6(13) | 17.8(7)  |
| C(41)  | 2425(4)  | 2585(2) | 2698.7(14) | 19.8(8)  |
| C(42)  | 1856(4)  | 2318(2) | 2257.8(15) | 24.6(8)  |
| C(43)  | 2087(5)  | 1559(2) | 2097.7(15) | 27.5(8)  |
| C(44)  | 2901(5)  | 1076(2) | 2382.6(15) | 30.5(9)  |
| C(45)  | 3462(4)  | 1335(2) | 2829.2(15) | 25.0(9)  |
| C(46)  | 4252(4)  | 1753(2) | 3836.3(14) | 17.9(7)  |
| C(47)  | 5472(4)  | 1334(2) | 3788.8(15) | 22.1(8)  |
| C(48)  | 5761(4)  | 715(2)  | 4107.8(17) | 28.6(9)  |
| C(49)  | 4849(5)  | 523(2)  | 4486.6(16) | 30.0(9)  |
| C(50)  | 3654(5)  | 937(2)  | 4542.4(15) | 29.9(9)  |
| C(51)  | 3339(4)  | 1550(2) | 4212.2(15) | 25.3(8)  |
| O(00I) | 3166(4)  | 4770(2) | 6800.7(14) | 55.3(10) |
| C(52)  | 3586(6)  | 5573(3) | 6878(2)    | 48.2(13) |
| C(53)  | 4565(7)  | 5562(4) | 7303(3)    | 62.7(17) |
| C(54)  | 4147(9)  | 4871(5) | 7609(3)    | 88(2)    |
| C(55)  | 3661(10) | 4332(4) | 7213(2)    | 84(3)    |

---

**Table S-10.** Anisotropic displacement parameters ( $\text{\AA}^2 \times 10^3$ ) for  $\text{Ni}^{\text{II}}\text{PhBr}(\text{Ph-BOX}^{\text{Ph}})$ . The anisotropic displacement factor exponent takes the form:  $-2\pi^2[h^2a^*2U_{11}+2hka^*b^*U_{12}+\dots]$ .

| Atom  | $U_{11}$  | $U_{22}$  | $U_{33}$ | $U_{23}$  | $U_{13}$ | $U_{12}$  |
|-------|-----------|-----------|----------|-----------|----------|-----------|
| Br(1) | 20.31(17) | 15.75(17) | 38.7(2)  | -4.21(17) | 3.57(17) | -2.16(15) |
| Ni(1) | 16.4(3)   | 13.4(3)   | 18.8(3)  | -3.4(2)   | -0.8(3)  | 0.2(2)    |
| O(1)  | 21.1(13)  | 10.2(11)  | 24.8(13) | -5.5(11)  | 3.4(10)  | -1.3(11)  |
| O(2)  | 16.3(11)  | 12.4(11)  | 17.2(12) | -3.9(9)   | 1.3(10)  | -1.4(10)  |
| N(1)  | 19.1(14)  | 10.7(13)  | 14.7(14) | -2.1(12)  | -1.9(11) | -2.8(12)  |
| N(2)  | 21.0(16)  | 14.6(15)  | 13.5(15) | -2.8(12)  | -0.1(12) | 2.6(12)   |
| C(1)  | 15.9(18)  | 22.3(18)  | 20.1(18) | -2.7(15)  | -1.6(14) | -2.5(14)  |
| C(2)  | 22.2(19)  | 22.3(19)  | 21.2(19) | -0.5(15)  | -2.8(15) | -3.2(15)  |
| C(3)  | 25(2)     | 38(2)     | 26(2)    | -11.9(19) | 5.2(17)  | 0.9(18)   |
| C(4)  | 29(2)     | 20(2)     | 42(3)    | -10.1(18) | 3.7(19)  | 4.6(17)   |
| C(5)  | 29(2)     | 23(2)     | 45(3)    | 0.3(18)   | 1(2)     | 3.0(17)   |
| C(6)  | 26.1(19)  | 26.5(19)  | 24.5(19) | -3.1(17)  | 0.8(18)  | 1.0(16)   |
| C(7)  | 18.5(17)  | 12.5(17)  | 13.7(16) | -1.9(13)  | 0.9(13)  | 2.7(13)   |
| C(8)  | 22.9(18)  | 7.7(16)   | 18.6(17) | -2.5(13)  | 3.7(14)  | -2.4(14)  |
| C(9)  | 21.8(18)  | 8.8(16)   | 17.6(17) | -5.5(13)  | -1.2(14) | 1.2(13)   |
| C(10) | 21.1(18)  | 18.9(17)  | 18.4(19) | -7.1(15)  | -0.8(15) | 1.6(14)   |
| C(11) | 36(2)     | 22.8(19)  | 18.5(19) | 0.1(17)   | -1.1(16) | -0.6(18)  |
| C(12) | 42(2)     | 29(2)     | 21(2)    | 3.6(18)   | -3.8(17) | -2.1(19)  |
| C(13) | 36(2)     | 41(3)     | 22(2)    | -3.3(18)  | -6.3(17) | 4.5(19)   |
| C(14) | 34(2)     | 38(2)     | 29(2)    | -11.2(19) | -8(2)    | -5.5(19)  |
| C(15) | 32(2)     | 23(2)     | 27(2)    | -2.0(16)  | -5.2(17) | -6.5(17)  |
| C(16) | 23.1(18)  | 15.0(15)  | 18.2(17) | -1.3(15)  | -2.7(16) | -0.5(13)  |
| C(17) | 24(2)     | 20.9(19)  | 24(2)    | 2.8(15)   | 2.5(16)  | -0.1(16)  |
| C(18) | 35(2)     | 31(2)     | 20(2)    | 5.4(17)   | 4.2(17)  | 1.9(18)   |
| C(19) | 41(2)     | 34(2)     | 23(2)    | 5.5(17)   | -5(2)    | 4(2)      |
| C(20) | 26(2)     | 37(2)     | 27(2)    | 1.5(18)   | -5.3(17) | 3.3(19)   |
| C(21) | 22.1(18)  | 35(2)     | 22.3(19) | 0.0(18)   | 1.9(17)  | 2.3(16)   |
| C(22) | 25.0(19)  | 11.6(16)  | 16.9(17) | -5.9(14)  | -3.1(15) | 3.1(14)   |
| C(23) | 29(2)     | 15.8(18)  | 29(2)    | -3.5(15)  | -2.0(17) | 2.0(16)   |
| C(24) | 28(2)     | 19.7(19)  | 35(2)    | -9.3(17)  | -8.1(17) | 6.3(15)   |
| C(25) | 45(2)     | 28(2)     | 23.4(19) | -10.9(19) | -3.6(19) | 15.5(18)  |
| C(26) | 53(3)     | 33(2)     | 23(2)    | -0.1(19)  | 12(2)    | 6(2)      |
| C(27) | 46(3)     | 19.0(18)  | 23(2)    | -0.8(16)  | 7.4(19)  | 1.8(18)   |
| C(28) | 20.8(18)  | 12.1(15)  | 19.8(17) | -5.5(13)  | 3.0(14)  | -7.3(14)  |
| C(29) | 26(2)     | 30(2)     | 48(3)    | -19(2)    | -6.0(19) | 2.2(17)   |

|        |          |          |          |           |           |          |
|--------|----------|----------|----------|-----------|-----------|----------|
| C(30)  | 57(3)    | 23(2)    | 26(2)    | -5.0(18)  | 22(2)     | -14(2)   |
| C(31)  | 17.2(17) | 11.7(15) | 13.1(16) | -0.8(13)  | -2.4(13)  | -0.8(14) |
| C(32)  | 17.6(17) | 11.9(16) | 15.4(16) | -2.9(13)  | 1.3(14)   | -1.4(14) |
| C(33)  | 20.3(17) | 14.8(17) | 12.5(17) | -3.4(14)  | -0.5(14)  | -1.0(14) |
| C(34)  | 19.5(18) | 14.3(17) | 20.0(19) | -0.8(14)  | 0.3(14)   | -3.5(14) |
| C(35)  | 29(2)    | 18.2(19) | 24(2)    | 2.5(16)   | 0.2(16)   | -0.6(16) |
| C(36)  | 40(3)    | 24(2)    | 28(2)    | 3.8(17)   | -0.8(19)  | -3.4(18) |
| C(37)  | 37(2)    | 31(2)    | 24(2)    | 9.9(18)   | 2.0(18)   | -9.6(19) |
| C(38)  | 41(3)    | 37(2)    | 15.8(19) | 1.8(17)   | 5.5(18)   | -4(2)    |
| C(39)  | 34(2)    | 24(2)    | 19(2)    | -2.2(16)  | 3.8(16)   | -0.3(17) |
| C(40)  | 20.6(19) | 18.1(18) | 14.8(17) | -1.9(14)  | -0.9(14)  | -3.1(14) |
| C(41)  | 22.4(19) | 15.6(17) | 21.3(18) | -3.6(15)  | -0.6(14)  | 1.9(14)  |
| C(42)  | 27(2)    | 23.5(19) | 23.5(19) | 3.8(16)   | -5.3(16)  | 0.5(16)  |
| C(43)  | 36(2)    | 28(2)    | 18.5(18) | -4.6(16)  | -6.5(18)  | -2(2)    |
| C(44)  | 47(3)    | 21.7(19) | 23(2)    | -10.2(16) | -6(2)     | 1(2)     |
| C(45)  | 34(2)    | 17.2(18) | 24(2)    | -2.5(15)  | -6.9(17)  | 4.6(16)  |
| C(46)  | 23.6(18) | 13.0(17) | 17.0(18) | -2.2(14)  | -3.8(15)  | -2.6(14) |
| C(47)  | 26(2)    | 20.7(19) | 19.9(19) | -4.0(16)  | -1.3(15)  | -1.3(15) |
| C(48)  | 32(2)    | 21.1(18) | 33(2)    | 0.2(19)   | -8.9(19)  | 4.7(16)  |
| C(49)  | 40(2)    | 23(2)    | 27(2)    | 4.8(17)   | -11.3(19) | -5.5(18) |
| C(50)  | 46(3)    | 23(2)    | 20.9(19) | 4.7(16)   | 0.5(19)   | -6.8(19) |
| C(51)  | 31(2)    | 17.5(17) | 27(2)    | -0.2(16)  | 1.3(16)   | -3.5(15) |
| O(00I) | 75(3)    | 49(2)    | 41(2)    | -13.2(18) | 5.1(19)   | -7(2)    |
| C(52)  | 54(3)    | 36(3)    | 55(3)    | -3(2)     | 5(3)      | 4(3)     |
| C(53)  | 60(4)    | 60(4)    | 68(4)    | -20(3)    | -7(3)     | -2(3)    |
| C(54)  | 98(6)    | 93(6)    | 72(5)    | -9(5)     | -16(4)    | 30(5)    |
| C(55)  | 157(8)   | 47(4)    | 49(4)    | 5(3)      | 15(4)     | 23(5)    |



**Table S-11.** Bond lengths for Ni<sup>II</sup>PhBr(Ph-BOX<sup>Ph</sup>).

|             |           |              |          |           |
|-------------|-----------|--------------|----------|-----------|
| Br(1) Ni(1) | 2.3087(7) | C(22)        | C(27)    | 1.376(6)  |
| Ni(1) N(1)  | 1.989(3)  | C(23)        | C(24)    | 1.378(6)  |
| Ni(1) N(2)  | 1.919(3)  | C(24)        | C(25)    | 1.383(6)  |
| Ni(1) C(1)  | 1.906(4)  | C(25)        | C(26)    | 1.375(6)  |
| O(1) C(7)   | 1.356(4)  | C(26)        | C(27)    | 1.391(6)  |
| O(1) C(8)   | 1.486(4)  | C(28)        | C(29)    | 1.540(6)  |
| O(2) C(31)  | 1.354(4)  | C(28)        | C(30)    | 1.554(5)  |
| O(2) C(32)  | 1.472(4)  | C(28)        | C(31)    | 1.497(5)  |
| N(1) C(7)   | 1.271(5)  | C(32)        | C(33)    | 1.559(5)  |
| N(1) C(9)   | 1.506(4)  | C(32)        | C(40)    | 1.521(5)  |
| N(2) C(31)  | 1.286(5)  | C(32)        | C(46)    | 1.531(5)  |
| N(2) C(33)  | 1.497(4)  | C(33)        | C(34)    | 1.519(5)  |
| C(1) C(2)   | 1.388(5)  | C(34)        | C(35)    | 1.394(5)  |
| C(1) C(6)   | 1.379(6)  | C(34)        | C(39)    | 1.393(5)  |
| C(2) C(3)   | 1.400(6)  | C(35)        | C(36)    | 1.394(6)  |
| C(3) C(4)   | 1.391(7)  | C(36)        | C(37)    | 1.374(6)  |
| C(4) C(5)   | 1.354(7)  | C(37)        | C(38)    | 1.374(6)  |
| C(5) C(6)   | 1.400(6)  | C(38)        | C(39)    | 1.384(6)  |
| C(7) C(28)  | 1.509(5)  | C(40)        | C(41)    | 1.390(5)  |
| C(8) C(9)   | 1.541(5)  | C(40)        | C(45)    | 1.390(5)  |
| C(8) C(16)  | 1.533(5)  | C(41)        | C(42)    | 1.384(5)  |
| C(8) C(22)  | 1.515(5)  | C(42)        | C(43)    | 1.385(6)  |
| C(9) C(10)  | 1.516(5)  | C(43)        | C(44)    | 1.378(6)  |
| C(10) C(11) | 1.388(6)  | C(44)        | C(45)    | 1.389(6)  |
| C(10) C(15) | 1.404(5)  | C(46)        | C(47)    | 1.395(5)  |
| C(11) C(12) | 1.382(6)  | C(46)        | C(51)    | 1.390(5)  |
| C(12) C(13) | 1.381(6)  | C(47)        | C(48)    | 1.390(6)  |
| C(13) C(14) | 1.387(7)  | C(48)        | C(49)    | 1.390(6)  |
| C(14) C(15) | 1.376(6)  | C(49)        | C(50)    | 1.372(7)  |
| C(16) C(17) | 1.385(5)  | C(50)        | C(51)    | 1.407(6)  |
| C(16) C(21) | 1.397(5)  | O(00I) C(52) | 1.449(6) |           |
| C(17) C(18) | 1.384(6)  | O(00I) C(55) | 1.419(8) |           |
| C(18) C(19) | 1.384(6)  | C(52)        | C(53)    | 1.488(9)  |
| C(19) C(20) | 1.390(6)  | C(53)        | C(54)    | 1.496(11) |
| C(20) C(21) | 1.375(6)  | C(54)        | C(55)    | 1.485(11) |
| C(22) C(23) | 1.401(5)  |              |          |           |

**Table S-12.** Bond angles for Ni<sup>II</sup>PhBr(Ph-BOX<sup>Ph</sup>).

|                   |            |                   |          |
|-------------------|------------|-------------------|----------|
| N(1) Ni(1) Br(1)  | 95.49(9)   | C(24) C(23) C(22) | 120.3(4) |
| N(2) Ni(1) Br(1)  | 165.34(10) | C(23) C(24) C(25) | 120.3(4) |
| N(2) Ni(1) N(1)   | 89.33(12)  | C(26) C(25) C(24) | 119.5(4) |
| C(1) Ni(1) Br(1)  | 87.07(11)  | C(25) C(26) C(27) | 120.5(4) |
| C(1) Ni(1) N(1)   | 170.23(15) | C(22) C(27) C(26) | 120.3(4) |
| C(1) Ni(1) N(2)   | 90.49(14)  | C(7) C(28) C(29)  | 108.6(3) |
| C(7) O(1) C(8)    | 103.7(3)   | C(7) C(28) C(30)  | 109.0(3) |
| C(31) O(2) C(32)  | 106.2(3)   | C(29) C(28) C(30) | 110.3(4) |
| C(7) N(1) Ni(1)   | 128.5(2)   | C(31) C(28) C(7)  | 111.4(3) |
| C(7) N(1) C(9)    | 106.1(3)   | C(31) C(28) C(29) | 109.4(3) |
| C(9) N(1) Ni(1)   | 125.5(2)   | C(31) C(28) C(30) | 108.1(3) |
| C(31) N(2) Ni(1)  | 129.7(3)   | O(2) C(31) C(28)  | 113.3(3) |
| C(31) N(2) C(33)  | 106.1(3)   | N(2) C(31) O(2)   | 116.7(3) |
| C(33) N(2) Ni(1)  | 123.4(2)   | N(2) C(31) C(28)  | 130.0(3) |
| C(2) C(1) Ni(1)   | 124.3(3)   | O(2) C(32) C(33)  | 100.4(3) |
| C(6) C(1) Ni(1)   | 116.5(3)   | O(2) C(32) C(40)  | 107.3(3) |
| C(6) C(1) C(2)    | 119.0(4)   | O(2) C(32) C(46)  | 107.3(3) |
| C(1) C(2) C(3)    | 120.1(4)   | C(40) C(32) C(33) | 117.1(3) |
| C(4) C(3) C(2)    | 119.6(4)   | C(40) C(32) C(46) | 113.2(3) |
| C(5) C(4) C(3)    | 120.3(4)   | C(46) C(32) C(33) | 110.3(3) |
| C(4) C(5) C(6)    | 120.3(4)   | N(2) C(33) C(32)  | 101.8(3) |
| C(1) C(6) C(5)    | 120.6(4)   | N(2) C(33) C(34)  | 109.2(3) |
| O(1) C(7) C(28)   | 113.1(3)   | C(34) C(33) C(32) | 116.4(3) |
| N(1) C(7) O(1)    | 117.4(3)   | C(35) C(34) C(33) | 123.2(3) |
| N(1) C(7) C(28)   | 129.4(3)   | C(39) C(34) C(33) | 117.9(3) |
| O(1) C(8) C(9)    | 100.5(3)   | C(39) C(34) C(35) | 118.9(4) |
| O(1) C(8) C(16)   | 104.4(3)   | C(34) C(35) C(36) | 119.5(4) |
| O(1) C(8) C(22)   | 109.1(3)   | C(37) C(36) C(35) | 120.9(4) |
| C(16) C(8) C(9)   | 113.9(3)   | C(36) C(37) C(38) | 119.7(4) |
| C(22) C(8) C(9)   | 115.7(3)   | C(37) C(38) C(39) | 120.3(4) |
| C(22) C(8) C(16)  | 111.8(3)   | C(38) C(39) C(34) | 120.6(4) |
| N(1) C(9) C(8)    | 100.9(3)   | C(41) C(40) C(32) | 120.3(3) |
| N(1) C(9) C(10)   | 110.4(3)   | C(45) C(40) C(32) | 121.0(3) |
| C(10) C(9) C(8)   | 114.7(3)   | C(45) C(40) C(41) | 118.7(3) |
| C(11) C(10) C(9)  | 123.2(3)   | C(42) C(41) C(40) | 120.6(3) |
| C(11) C(10) C(15) | 118.8(4)   | C(41) C(42) C(43) | 120.6(4) |
| C(15) C(10) C(9)  | 118.0(4)   | C(44) C(43) C(42) | 118.9(4) |

|                 |                            |          |
|-----------------|----------------------------|----------|
| C(12)C(11)C(10) | 120.4(4) C(43) C(44) C(45) | 121.0(4) |
| C(13)C(12)C(11) | 120.7(4) C(44) C(45) C(40) | 120.2(4) |
| C(12)C(13)C(14) | 119.3(4) C(47) C(46) C(32) | 120.6(3) |
| C(15)C(14)C(13) | 120.6(4) C(51) C(46) C(32) | 120.3(3) |
| C(14)C(15)C(10) | 120.3(4) C(51) C(46) C(47) | 119.0(4) |
| C(17)C(16)C(8)  | 122.9(3) C(48) C(47) C(46) | 120.5(4) |
| C(17)C(16)C(21) | 119.1(4) C(49) C(48) C(47) | 120.1(4) |
| C(21)C(16)C(8)  | 117.8(3) C(50) C(49) C(48) | 120.1(4) |
| C(18)C(17)C(16) | 120.1(4) C(49) C(50) C(51) | 120.1(4) |
| C(17)C(18)C(19) | 120.6(4) C(46) C(51) C(50) | 120.2(4) |
| C(18)C(19)C(20) | 119.5(4) C(55) O(00I)C(52) | 107.1(5) |
| C(21)C(20)C(19) | 120.0(4) O(00I)C(52) C(53) | 106.2(5) |
| C(20)C(21)C(16) | 120.8(4) C(52) C(53) C(54) | 104.8(6) |
| C(23)C(22)C(8)  | 118.1(3) C(55) C(54) C(53) | 100.7(6) |
| C(27)C(22)C(8)  | 122.9(3) O(00I)C(55) C(54) | 109.7(6) |
| C(27)C(22)C(23) | 119.0(3)                   |          |

---

**Table S-13.** Hydrogen atom coordinates ( $\text{\AA}\times 10^4$ ) and isotropic displacement parameters ( $\text{\AA}^2\times 10^3$ ) for  $\text{Ni}^{\text{II}}\text{PhBr}(\text{Ph-BOX}^{\text{Ph}})$ .

| Atom   | $x$   | $y$  | $z$  | U(eq) |
|--------|-------|------|------|-------|
| H(2)   | 8065  | 3990 | 3162 | 26    |
| H(3)   | 9556  | 2987 | 2906 | 36    |
| H(4)   | 10125 | 1984 | 3462 | 36    |
| H(5)   | 9253  | 1986 | 4259 | 39    |
| H(6)   | 7656  | 2938 | 4500 | 31    |
| H(9)   | 5637  | 5962 | 4477 | 19    |
| H(11)  | 4561  | 4493 | 5375 | 31    |
| H(12)  | 5433  | 4380 | 6178 | 37    |
| H(13)  | 7054  | 5269 | 6472 | 39    |
| H(14)  | 7713  | 6319 | 5970 | 40    |
| H(15)  | 6840  | 6449 | 5170 | 33    |
| H(17)  | 4807  | 6015 | 3758 | 28    |
| H(18)  | 3992  | 6484 | 2999 | 35    |
| H(19)  | 1805  | 7031 | 2943 | 39    |
| H(20)  | 482   | 7181 | 3667 | 36    |
| H(21)  | 1287  | 6709 | 4423 | 32    |
| H(23)  | 4363  | 7379 | 4877 | 30    |
| H(24)  | 3738  | 8234 | 5510 | 33    |
| H(25)  | 2162  | 7846 | 6117 | 38    |
| H(26)  | 1276  | 6585 | 6101 | 44    |
| H(27)  | 1901  | 5719 | 5468 | 35    |
| H(29A) | 860   | 4497 | 4269 | 52    |
| H(29B) | 965   | 3760 | 3904 | 52    |
| H(29C) | 1676  | 4569 | 3754 | 52    |
| H(30A) | 3284  | 3250 | 4903 | 53    |
| H(30B) | 1843  | 3018 | 4658 | 53    |
| H(30C) | 1956  | 3775 | 5006 | 53    |
| H(33)  | 6003  | 2687 | 3454 | 19    |
| H(35)  | 4181  | 4433 | 3156 | 29    |
| H(36)  | 4290  | 5079 | 2388 | 37    |
| H(37)  | 5274  | 4478 | 1700 | 37    |
| H(38)  | 6238  | 3242 | 1779 | 38    |
| H(39)  | 6203  | 2600 | 2544 | 31    |
| H(41)  | 2259  | 3107 | 2804 | 24    |
| H(42)  | 1302  | 2658 | 2063 | 30    |

|        |      |      |      |     |
|--------|------|------|------|-----|
| H(43)  | 1690 | 1375 | 1796 | 33  |
| H(44)  | 3081 | 559  | 2272 | 37  |
| H(45)  | 4001 | 990  | 3025 | 30  |
| H(47)  | 6110 | 1472 | 3536 | 26  |
| H(48)  | 6582 | 424  | 4067 | 34  |
| H(49)  | 5053 | 104  | 4707 | 36  |
| H(50)  | 3038 | 809  | 4804 | 36  |
| H(51)  | 2499 | 1826 | 4246 | 30  |
| H(52A) | 2783 | 5904 | 6957 | 58  |
| H(52B) | 4036 | 5781 | 6575 | 58  |
| H(53A) | 4495 | 6050 | 7500 | 75  |
| H(53B) | 5519 | 5504 | 7183 | 75  |
| H(54A) | 4933 | 4649 | 7794 | 105 |
| H(54B) | 3404 | 5005 | 7845 | 105 |
| H(55A) | 4424 | 3991 | 7104 | 101 |
| H(55B) | 2919 | 3996 | 7345 | 101 |

---



**Table S-14.** Crystal data and structure refinement for Ni<sup>I</sup>Br(Ph-BOX).

|                                             |                                                                   |
|---------------------------------------------|-------------------------------------------------------------------|
| Identification code                         | (( <i>R,R</i> )-Ph-BOX)Ni <sup>I</sup> Br                         |
| Empirical formula                           | C <sub>21</sub> H <sub>22</sub> BrN <sub>2</sub> NiO <sub>2</sub> |
| Formula weight                              | 473.03                                                            |
| Temperature/K                               | 100(2)                                                            |
| Crystal system                              | orthorhombic                                                      |
| Space group                                 | P2 <sub>1</sub> 2 <sub>1</sub> 2 <sub>1</sub>                     |
| a/Å                                         | 9.457(2)                                                          |
| b/Å                                         | 13.597(3)                                                         |
| c/Å                                         | 15.622(4)                                                         |
| α/°                                         | 90.00                                                             |
| β/°                                         | 90.00                                                             |
| γ/°                                         | 90.00                                                             |
| Volume/Å <sup>3</sup>                       | 2008.7(8)                                                         |
| Z                                           | 4                                                                 |
| ρ <sub>calc</sub> /cm <sup>3</sup>          | 1.564                                                             |
| μ/mm <sup>-1</sup>                          | 2.973                                                             |
| F(000)                                      | 964.0                                                             |
| Crystal size/mm <sup>3</sup>                | 0.289 × 0.151 × 0.133                                             |
| Radiation                                   | MoKα (λ = 0.71073)                                                |
| 2θ range for data collection/°              | 5.22 to 87.34                                                     |
| Index ranges                                | -18 ≤ h ≤ 18, -26 ≤ k ≤ 22, -30 ≤ l ≤ 30                          |
| Reflections collected                       | 58562                                                             |
| Independent reflections                     | 15114 [R <sub>int</sub> = 0.0433, R <sub>sigma</sub> = 0.0574]    |
| Data/restraints/parameters                  | 15114/0/246                                                       |
| Goodness-of-fit on F <sup>2</sup>           | 0.988                                                             |
| Final R indexes [I ≥ 2σ (I)]                | R <sub>1</sub> = 0.0335, wR <sub>2</sub> = 0.0511                 |
| Final R indexes [all data]                  | R <sub>1</sub> = 0.0612, wR <sub>2</sub> = 0.0566                 |
| Largest diff. peak/hole / e Å <sup>-3</sup> | 0.53/-0.64                                                        |
| Flack parameter                             | 0.006(4)                                                          |

**Table S-15.** Fractional atomic coordinates ( $\times 10^4$ ) and equivalent isotropic displacement parameters ( $\text{\AA}^2 \times 10^3$ ) for Ni<sup>I</sup>Br(Ph-BOX).  $U_{\text{eq}}$  is defined as 1/3 of the trace of the orthogonalised  $U_{ij}$  tensor.

| Atom  | $x$         | $y$         | $z$        | $U(\text{eq})$ |
|-------|-------------|-------------|------------|----------------|
| Br(1) | 6216.02(12) | 9468.17(8)  | 3699.36(7) | 23.29(3)       |
| Ni(1) | 6909.02(14) | 7850.53(10) | 3608.76(8) | 16.32(3)       |
| O(1)  | 8826.1(8)   | 5366.3(6)   | 2632.7(5)  | 22.19(15)      |
| O(2)  | 5767.1(8)   | 5451.2(6)   | 5070.4(5)  | 21.60(15)      |
| N(1)  | 7940.0(9)   | 6843.9(7)   | 2994.0(5)  | 17.13(16)      |
| N(2)  | 6339.0(9)   | 6903.8(7)   | 4477.4(5)  | 16.75(15)      |
| C(1)  | 8725.1(11)  | 7030.9(9)   | 2181.2(6)  | 19.90(19)      |
| C(2)  | 9377.9(12)  | 6016.9(10)  | 1972.6(7)  | 25.6(2)        |
| C(3)  | 8023.7(10)  | 5926.1(8)   | 3159.9(6)  | 16.70(17)      |
| C(4)  | 7245.2(10)  | 5334.5(8)   | 3827.7(6)  | 16.81(18)      |
| C(5)  | 8261.7(13)  | 4672.7(10)  | 4337.3(9)  | 31.0(3)        |
| C(6)  | 6177.1(14)  | 4688.8(10)  | 3334.1(8)  | 28.5(2)        |
| C(7)  | 6441.8(10)  | 5972.2(8)   | 4453.7(6)  | 16.16(17)      |
| C(8)  | 4881.4(12)  | 6171.2(9)   | 5520.5(8)  | 23.9(2)        |
| C(9)  | 5520.7(11)  | 7165.4(9)   | 5267.8(6)  | 18.89(18)      |
| C(10) | 7712.3(11)  | 7394.4(8)   | 1502.8(6)  | 18.29(19)      |
| C(11) | 7986.8(13)  | 8247.3(9)   | 1040.0(8)  | 25.9(2)        |
| C(12) | 7058.3(16)  | 8557.9(11)  | 398.4(9)   | 34.5(3)        |
| C(13) | 5846.6(14)  | 8026.1(11)  | 229.5(8)   | 31.7(3)        |
| C(14) | 5545.7(14)  | 7179.2(11)  | 693.3(7)   | 27.6(2)        |
| C(15) | 6480.7(11)  | 6867.8(9)   | 1322.6(7)  | 21.93(19)      |
| C(16) | 6509.3(10)  | 7620.7(8)   | 5917.8(6)  | 16.64(18)      |
| C(17) | 7521.5(11)  | 7051.9(8)   | 6346.5(8)  | 22.95(19)      |
| C(18) | 8417.0(12)  | 7476.6(9)   | 6948.5(8)  | 23.5(2)        |
| C(19) | 8308.7(13)  | 8468.7(9)   | 7132.9(8)  | 25.2(2)        |
| C(20) | 7342.7(14)  | 9044.0(9)   | 6690.3(9)  | 27.8(2)        |
| C(21) | 6456.2(12)  | 8621.2(9)   | 6084.6(8)  | 22.7(2)        |



**Table S-16.** Anisotropic displacement parameters ( $\text{\AA}^2 \times 10^3$ ) for Ni<sup>I</sup>Br(Ph-BOX). The anisotropic displacement factor exponent takes the form:  $-2\pi^2[h^2a^{*2}U_{11}+2hka^*b^*U_{12}+\dots]$ .

| Atom  | U <sub>11</sub> | U <sub>22</sub> | U <sub>33</sub> | U <sub>23</sub> | U <sub>13</sub> | U <sub>12</sub> |
|-------|-----------------|-----------------|-----------------|-----------------|-----------------|-----------------|
| Br(1) | 30.22(5)        | 15.64(4)        | 24.01(5)        | 1.29(4)         | -6.95(4)        | 3.18(4)         |
| Ni(1) | 19.66(5)        | 15.08(6)        | 14.22(5)        | 0.28(5)         | -2.43(5)        | 0.84(5)         |
| O(1)  | 23.3(3)         | 23.6(4)         | 19.7(3)         | -1.0(3)         | 6.1(3)          | 5.2(3)          |
| O(2)  | 24.0(3)         | 19.8(4)         | 21.0(4)         | -0.3(3)         | 7.2(3)          | -3.9(3)         |
| N(1)  | 18.1(4)         | 20.5(4)         | 12.7(3)         | 0.4(3)          | 0.1(3)          | 0.7(3)          |
| N(2)  | 18.2(4)         | 18.2(4)         | 13.8(3)         | -0.9(3)         | 1.0(3)          | 2.6(3)          |
| C(1)  | 18.2(4)         | 25.8(5)         | 15.6(4)         | 1.1(4)          | 2.4(3)          | -3.0(4)         |
| C(2)  | 24.4(5)         | 34.4(7)         | 18.0(5)         | 3.1(4)          | 4.6(4)          | 8.7(5)          |
| C(3)  | 14.4(4)         | 21.2(5)         | 14.5(4)         | -2.5(3)         | -0.8(3)         | 1.9(4)          |
| C(4)  | 16.5(4)         | 16.3(4)         | 17.7(4)         | -0.1(3)         | 0.2(3)          | 1.3(3)          |
| C(5)  | 24.0(5)         | 33.2(7)         | 35.8(6)         | 15.0(5)         | 5.7(5)          | 11.8(5)         |
| C(6)  | 29.3(5)         | 29.7(6)         | 26.6(5)         | -9.1(5)         | 3.2(5)          | -9.9(5)         |
| C(7)  | 15.1(4)         | 19.1(5)         | 14.3(4)         | -0.1(3)         | 0.1(3)          | -1.7(3)         |
| C(8)  | 21.6(5)         | 27.4(6)         | 22.9(5)         | -3.6(4)         | 7.3(4)          | -3.5(4)         |
| C(9)  | 17.1(4)         | 22.6(5)         | 17.0(4)         | -1.7(4)         | 2.1(3)          | 2.2(4)          |
| C(10) | 22.3(4)         | 18.7(5)         | 13.9(4)         | 1.1(3)          | 4.1(3)          | 1.3(4)          |
| C(11) | 29.1(5)         | 21.4(5)         | 27.3(5)         | 5.6(4)          | 9.4(4)          | 0.7(5)          |
| C(12) | 45.2(8)         | 27.4(7)         | 31.0(6)         | 13.9(5)         | 10.7(6)         | 12.2(6)         |
| C(13) | 39.2(7)         | 36.1(8)         | 19.7(5)         | 2.6(5)          | -0.2(4)         | 17.8(6)         |
| C(14) | 29.4(5)         | 33.5(7)         | 19.9(5)         | -4.6(5)         | -5.0(4)         | 5.3(5)          |
| C(15) | 26.4(5)         | 21.2(5)         | 18.2(4)         | 0.0(4)          | -2.1(4)         | -1.3(4)         |
| C(16) | 18.7(4)         | 18.0(5)         | 13.3(4)         | 0.1(3)          | 3.5(3)          | 2.4(3)          |
| C(17) | 27.1(5)         | 16.2(4)         | 25.5(5)         | 0.8(4)          | -2.6(4)         | 3.1(4)          |
| C(18) | 24.3(5)         | 21.7(6)         | 24.6(5)         | 4.6(4)          | -4.7(4)         | -0.1(4)         |
| C(19) | 27.5(5)         | 23.5(6)         | 24.5(5)         | -2.5(4)         | -3.2(4)         | -2.4(4)         |
| C(20) | 35.7(6)         | 16.3(5)         | 31.2(6)         | -3.6(5)         | -3.3(5)         | 4.2(5)          |
| C(21) | 26.5(5)         | 19.0(5)         | 22.6(5)         | -0.5(4)         | -1.2(4)         | 6.8(4)          |

**Table S-17.** Bond lengths for Ni<sup>I</sup>Br(Ph-BOX).

---

|             |            |            |            |
|-------------|------------|------------|------------|
| Br(1) Ni(1) | 2.2994(5)  | C(4) C(7)  | 1.5118(14) |
| Ni(1)N(1)   | 1.9355(9)  | C(8) C(9)  | 1.5324(17) |
| Ni(1)N(2)   | 1.9466(9)  | C(9) C(16) | 1.5128(15) |
| O(1) C(2)   | 1.4554(15) | C(10)C(11) | 1.3910(16) |
| O(1) C(3)   | 1.3540(12) | C(10)C(15) | 1.3958(15) |
| O(2) C(7)   | 1.3554(13) | C(11)C(12) | 1.3978(18) |
| O(2) C(8)   | 1.4678(14) | C(12)C(13) | 1.380(2)   |
| N(1) C(1)   | 1.4928(13) | C(13)C(14) | 1.3899(19) |
| N(1) C(3)   | 1.2770(14) | C(14)C(15) | 1.3884(16) |
| N(2) C(7)   | 1.2709(14) | C(16)C(17) | 1.4011(15) |
| N(2) C(9)   | 1.5000(13) | C(16)C(21) | 1.3859(16) |
| C(1) C(2)   | 1.5454(17) | C(17)C(18) | 1.3912(16) |
| C(1) C(10)  | 1.5115(15) | C(18)C(19) | 1.3831(17) |
| C(3) C(4)   | 1.5091(15) | C(19)C(20) | 1.3873(17) |
| C(4) C(5)   | 1.5387(15) | C(20)C(21) | 1.3888(17) |
| C(4) C(6)   | 1.5446(16) |            |            |

---

**Table S-18.** Bond angles /° for Ni<sup>I</sup>Br(Ph-BOX).

---

|                  |            |                   |            |
|------------------|------------|-------------------|------------|
| N(1) Ni(1) Br(1) | 148.27(3)  | O(2) C(7) C(4)    | 113.36(9)  |
| N(1) Ni(1) N(2)  | 91.02(4)   | N(2) C(7) O(2)    | 117.66(9)  |
| N(2) Ni(1) Br(1) | 120.71(3)  | N(2) C(7) C(4)    | 128.97(9)  |
| C(3) O(1) C(2)   | 106.87(9)  | O(2) C(8) C(9)    | 103.88(8)  |
| C(7) O(2) C(8)   | 105.10(9)  | N(2) C(9) C(8)    | 101.91(9)  |
| C(1) N(1) Ni(1)  | 123.52(7)  | N(2) C(9) C(16)   | 109.32(8)  |
| C(3) N(1) Ni(1)  | 128.43(7)  | C(16) C(9) C(8)   | 115.58(9)  |
| C(3) N(1) C(1)   | 107.96(9)  | C(11) C(10) C(1)  | 121.25(10) |
| C(7) N(2) Ni(1)  | 128.14(7)  | C(11) C(10) C(15) | 118.59(11) |
| C(7) N(2) C(9)   | 107.44(9)  | C(15) C(10) C(1)  | 120.16(10) |
| C(9) N(2) Ni(1)  | 124.05(7)  | C(10) C(11) C(12) | 120.48(12) |
| N(1) C(1) C(2)   | 103.07(9)  | C(13) C(12) C(11) | 120.02(12) |
| N(1) C(1) C(10)  | 109.69(8)  | C(12) C(13) C(14) | 120.28(12) |
| C(10) C(1) C(2)  | 113.39(9)  | C(15) C(14) C(13) | 119.43(12) |
| O(1) C(2) C(1)   | 104.45(8)  | C(14) C(15) C(10) | 121.18(11) |
| O(1) C(3) C(4)   | 113.22(9)  | C(17) C(16) C(9)  | 121.14(10) |
| N(1) C(3) O(1)   | 117.43(9)  | C(21) C(16) C(9)  | 120.36(10) |
| N(1) C(3) C(4)   | 129.12(9)  | C(21) C(16) C(17) | 118.47(10) |
| C(3) C(4) C(5)   | 111.38(9)  | C(18) C(17) C(16) | 120.66(10) |
| C(3) C(4) C(6)   | 106.08(9)  | C(19) C(18) C(17) | 120.04(11) |
| C(3) C(4) C(7)   | 112.75(9)  | C(18) C(19) C(20) | 119.66(11) |
| C(5) C(4) C(6)   | 109.54(11) | C(19) C(20) C(21) | 120.25(12) |
| C(7) C(4) C(5)   | 108.34(9)  | C(16) C(21) C(20) | 120.83(11) |
| C(7) C(4) C(6)   | 108.69(9)  |                   |            |

---

**Table S-19.** Hydrogen atom coordinates ( $\text{\AA}\times 10^4$ ) and isotropic displacement parameters ( $\text{\AA}^2\times 10^3$ ) for Ni<sup>I</sup>Br(Ph-BOX).

| Atom  | <i>x</i> | <i>y</i> | <i>z</i> | U(eq) |
|-------|----------|----------|----------|-------|
| H(1)  | 9489     | 7527     | 2279     | 24    |
| H(2A) | 9086     | 5792     | 1397     | 31    |
| H(2B) | 10423    | 6046     | 1996     | 31    |
| H(5A) | 8817     | 4271     | 3940     | 46    |
| H(5B) | 7716     | 4243     | 4717     | 46    |
| H(5C) | 8899     | 5083     | 4679     | 46    |
| H(6A) | 5544     | 5110     | 2999     | 43    |
| H(6B) | 5620     | 4301     | 3741     | 43    |
| H(6C) | 6689     | 4245     | 2949     | 43    |
| H(8A) | 4927     | 6072     | 6148     | 29    |
| H(8B) | 3884     | 6123     | 5333     | 29    |
| H(9)  | 4750     | 7640     | 5121     | 23    |
| H(11) | 8811     | 8621     | 1161     | 31    |
| H(12) | 7261     | 9135     | 79       | 41    |
| H(13) | 5216     | 8240     | -206     | 38    |
| H(14) | 4707     | 6817     | 581      | 33    |
| H(15) | 6279     | 6286     | 1636     | 26    |
| H(17) | 7597     | 6369     | 6225     | 28    |
| H(18) | 9103     | 7085     | 7233     | 28    |
| H(19) | 8893     | 8755     | 7560     | 30    |
| H(20) | 7287     | 9730     | 6802     | 33    |
| H(21) | 5805     | 9023     | 5781     | 27    |

## X. Computational Details

General computational methods. All calculations were performed with Gaussian 09 Rev B.01.<sup>9</sup> Unless otherwise noted, the gas-phase geometry optimizations were performed with the B3LYP hybrid functional and 6-31G\* basis set for all atoms with spin state being the only restraint, followed by numerical frequency calculations at the same level of theory to characterize stationary points as minima (no imaginary frequencies) or transition states (one and only one imaginary frequency) on the potential energy surface. Intrinsic reaction coordinate (IRC) calculations were conducted to ensure the relevance of transition states to the corresponding intermediates. Exhaustive conformational searches were performed for all intermediates in order to map out the lowest energy profile. Thermal corrections for enthalpies and free energies at 213 K were obtained from frequency calculations. Free energies were corrected (1.21 kcal mol<sup>-1</sup> at 213 K; 1.89 kcal mol<sup>-1</sup> at 298 K) from standard state (1 bar) to solution state (1 M). Single-point energy calculations including solvent effects were performed using M06 functional with 6-311+G\*\* basis set with SMD solvation model on optimized geometries. The choice of functional and basis sets was based on previous studies,<sup>10</sup> as well as our own efforts in benchmarking computationally optimized geometries to crystal structures.

Time-dependent DFT calculations were carried out at the B3LYP/6-31G\* level of theory on optimized geometries. Natural transition orbital calculations<sup>11</sup> were carried out following td-DFT calculations to assist the assignment of transitions.

Spin density plots and natural transition orbital representations were rendered with Chemcraft.<sup>12</sup> Molecular geometries were rendered with CYLview.<sup>13</sup>

---

(9) Frisch, M. J., et al., Gaussian, Inc., Wallingford CT, 2010.

(10) Gutierrez, O.; Tellis, J. C.; Primer, D. N.; Molander, G. A.; Kozlowski, M. C. Nickel-Catalyzed Cross-Coupling of Photoredox-Generated Radicals: Uncovering a General Manifold for Stereoconvergence in Nickel-Catalyzed Cross-Couplings. *J. Am. Chem. Soc.* **2015**, *137*, 4896–4899.

(11) Martin, R. L. Natural Transition Orbitals. *J. Chem. Phys.* **2003**, *118*, 4775–4777.

(12) <https://www.chemcraftprog.com>.

(13) Legault, C. Y. Université de Sherbrooke, 2009. <http://www.cylview.org>.

### Calculated spin density plots:

$\text{Ni}^{\text{I}}\text{Br}(\text{Ph-BOX})$  (**3**;  $S = \frac{1}{2}$ )

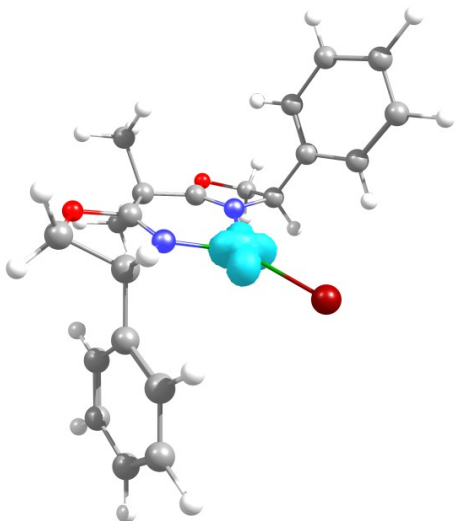

$\text{Ni}^{\text{II}}\text{Br}_2(\text{Ph-BOX})$  (**1**;  $S = 1$ )

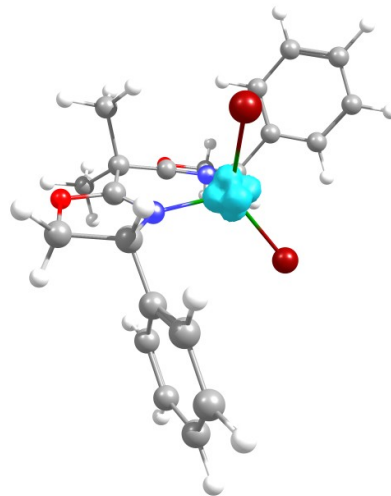

**Time-dependent DFT results.** Based on the crystal field splitting, the square planar  $\text{Ni}^{\text{II}}\text{PhBr}(\text{Ph-BOX})$  and  $\text{Ni}^{\text{II}}\text{PhBr}(\text{Ph-BOX}^{\text{Ph}})$  complexes should feature two absorptive  $d \rightarrow d$  transitions as the lowest and the second-lowest energy transitions. The assignments are consistent with the results found from time-dependent DFT calculations. The td-DFT results for the first two electronic transitions are shown below in natural transition orbital representations. The axis used for the natural transition orbital representations is indicated:

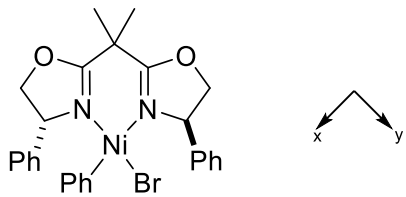

$\text{Ni}^{\text{II}}\text{PhBr}(\text{Ph-BOX})$  (**2**):

*Transition 1 ( $d_{z^2} \rightarrow d_{x^2-y^2}$ )*

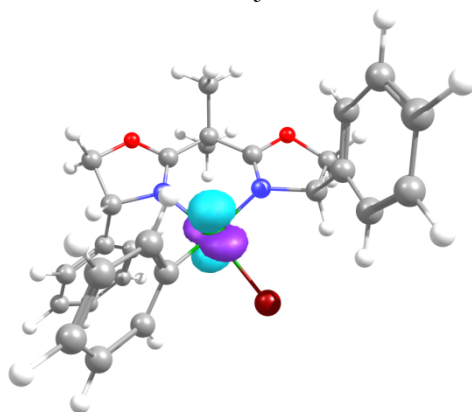

*donor*

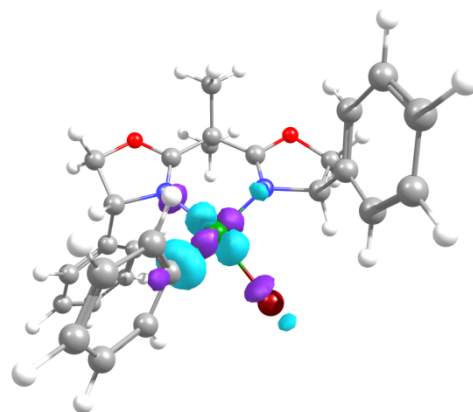

*acceptor*

*Transition 2 ( $d_{xy} \rightarrow d_{x^2-y^2}$ )*

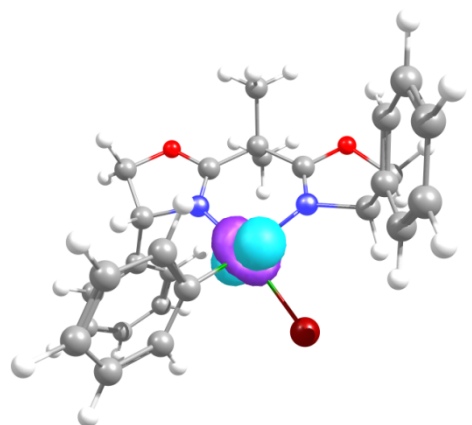

*donor*

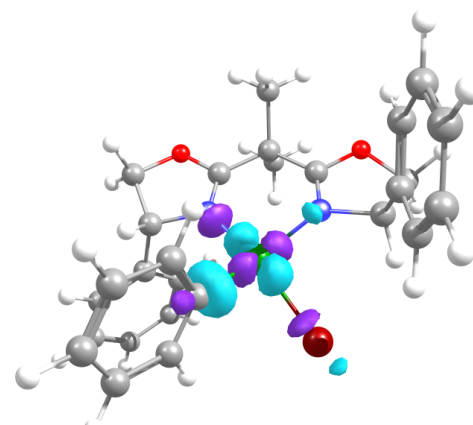

*acceptor*

$\text{Ni}^{\text{II}}\text{PhBr}(\text{Ph-BOX}^{\text{Ph}})$  ( $2^{\text{Ph}}$ ):  
 Transition 1 ( $dz^2 \rightarrow dx^2-y^2$ )

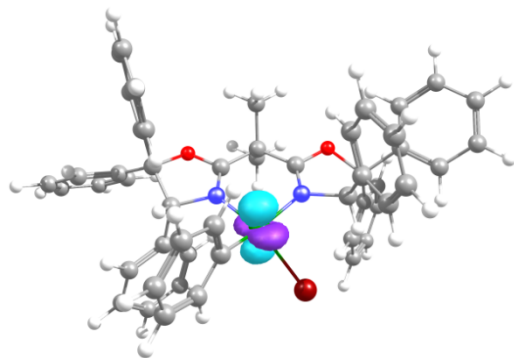

*donor*

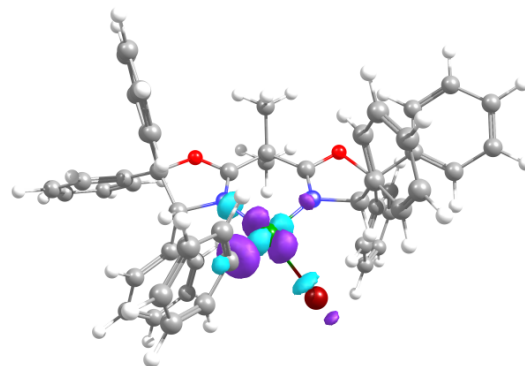

*acceptor*

Transition 2 ( $dxy \rightarrow dx^2-y^2$ )

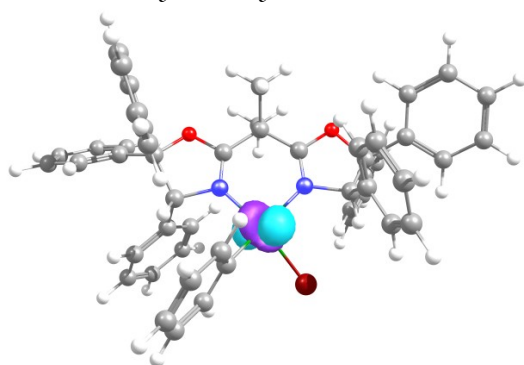

*donor*

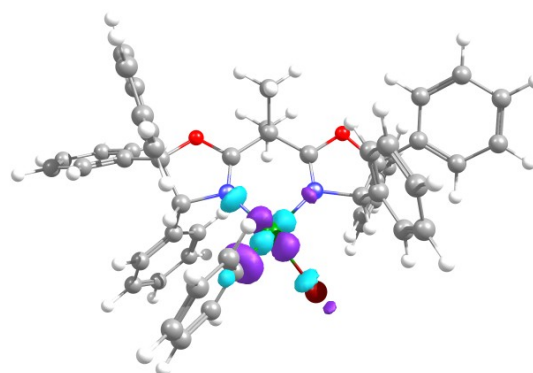

*acceptor*

**Bending of the Ni-Br bond in  $\text{Ni}^{\text{I}}\text{Br}(\text{Ph-BOX})$  (**3**):**

Relative  $\Delta G_{213\text{K}}$  ( $\text{kcal mol}^{-1}$ ):

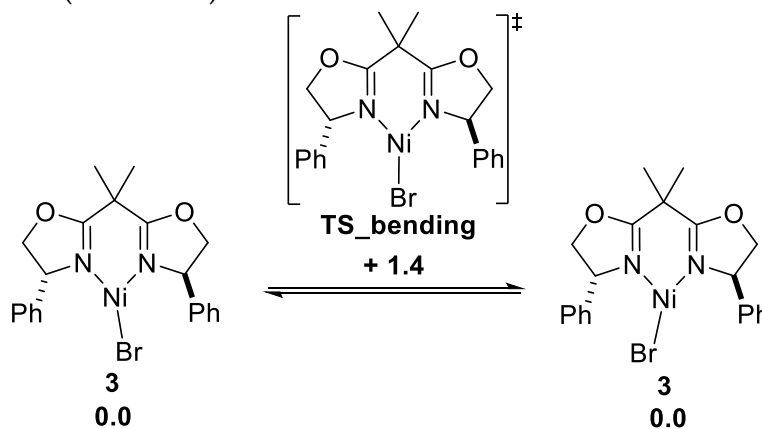



Computed relative free energies for the bending of the Ni–Br bond in Ni<sup>I</sup>Br(Ph-BOX) (3), calculated at (U)M06/6-311+G\*\*, SMD(THF) //(U)B3LYP/6-31G\* level of theory.

Geometries:

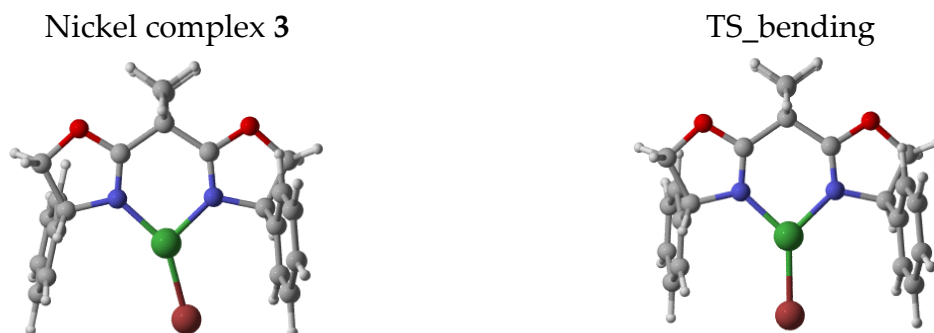

**Radical recombination (RR) and reductive elimination (RE) steps:**

Relative  $\Delta G_{213K}$  (kcal mol<sup>-1</sup>):

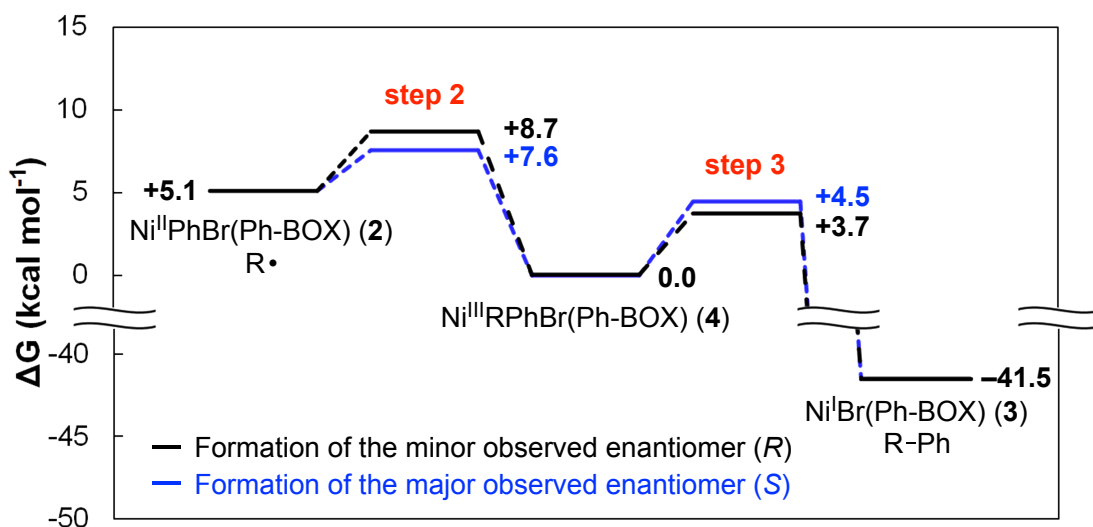

Computed relative free energies for radical recombination (RR) and reductive elimination (RE) steps to form major (blue) and minor (black) enantiomers of the cross-coupling product. The DFT calculations were carried out at (U)M06/6-311+G\*\*, SMD(THF) //(U)B3LYP/6-31G\* level of theory.

Geometries of intermediates and transition states along the major (in blue) and minor (in black) pathways:

TS-RR

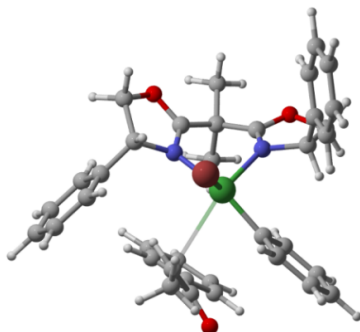

Ni-C(Ph) = 1.962 Å  
Ni-C(R) = 3.018 Å  
C-Ni-C = 73.66 °  
Ni-Br = 2.429 Å

Nickel complex 4

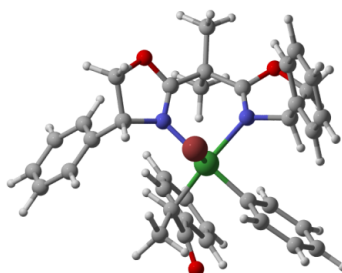

Ni-C(Ph) = 1.907 Å  
Ni-C(R) = 2.023 Å  
C-Ni-C = 84.93 °  
Ni-Br = 2.508 Å

TS-RE

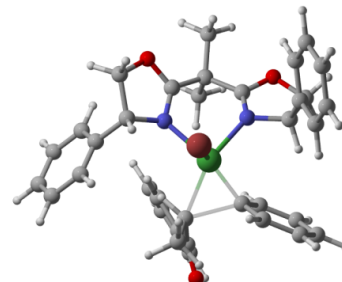

Ni-C(Ph) = 1.909 Å  
Ni-C(R) = 2.201 Å  
C-Ni-C = 59.00 °  
Ni-Br = 2.460 Å

TS-RR'

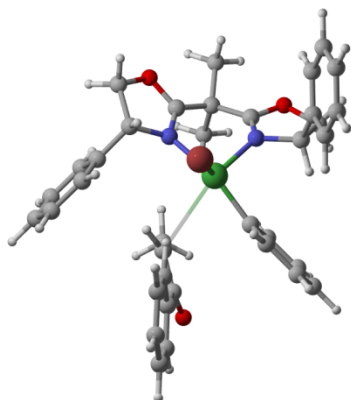

Ni-C(Ph) = 1.965 Å  
Ni-C(R) = 3.038 Å  
C-Ni-C = 71.47 °  
Ni-Br = 2.428 Å

4'

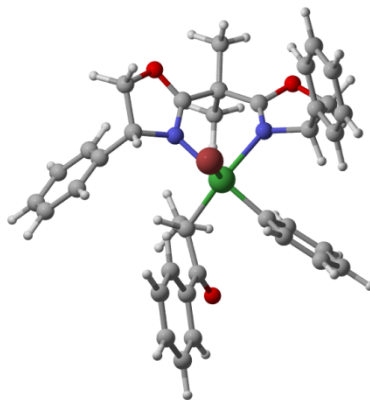

Ni-C(Ph) = 1.906 Å  
Ni-C(R) = 1.995 Å  
C-Ni-C = 85.13 °  
Ni-Br = 2.509 Å

TS-RE'

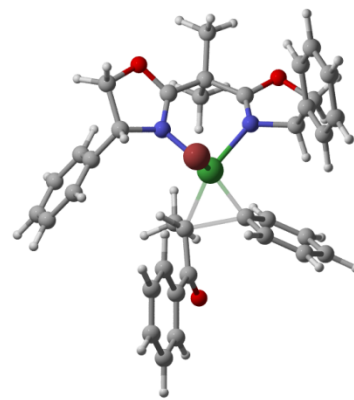

Ni-C(Ph) = 1.912 Å  
Ni-C(R) = 2.148 Å  
C-Ni-C = 59.72 °  
Ni-Br = 2.473 Å

## Computed free energies of the individual steps

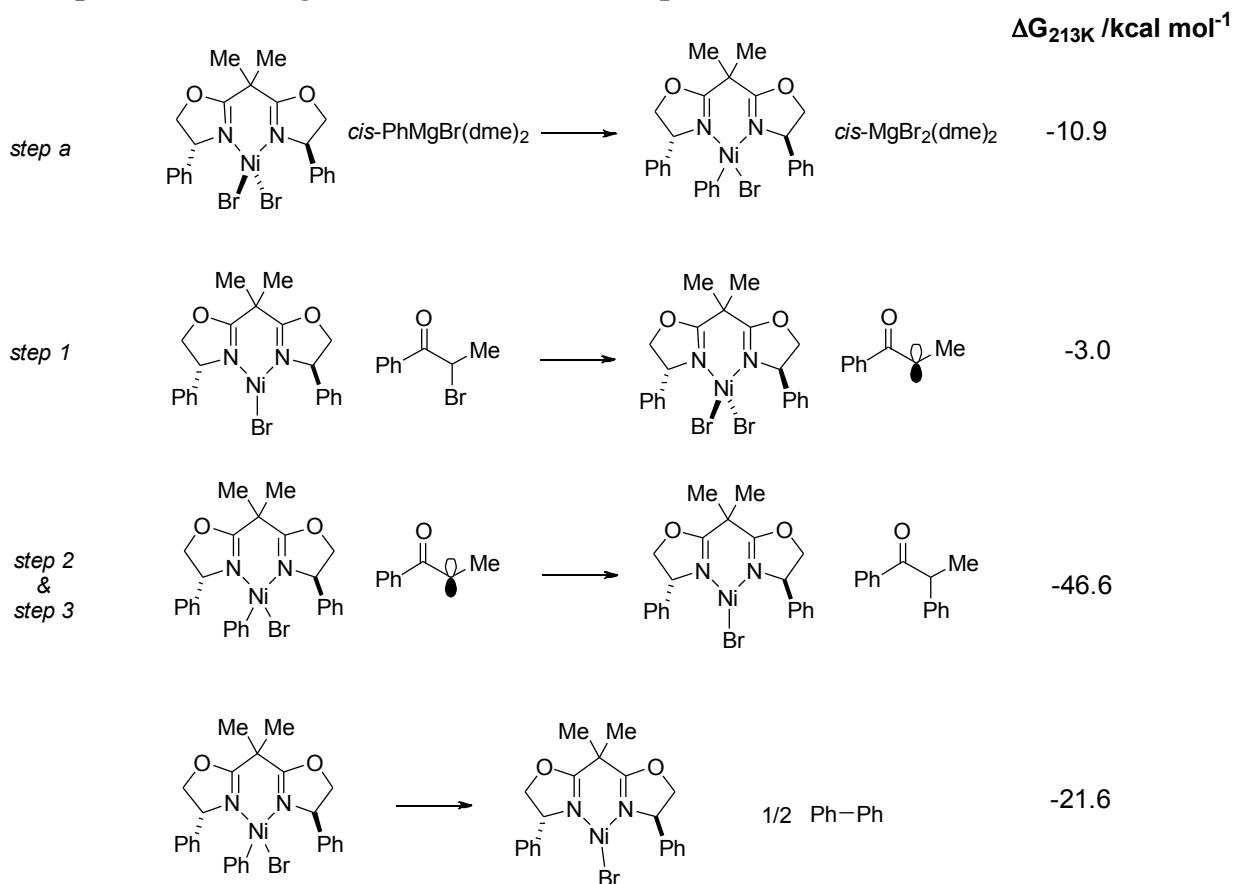

(U)M06/6-311+G\*\*,SMD(THF)//(U)B3LYP/6-31G\*

Coordinates of computed geometries:

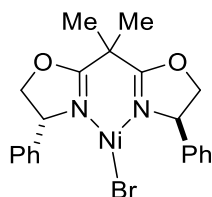

**3 Ni<sup>I</sup>Br(Ph-BOX) doublet**

|   |             |            |             |
|---|-------------|------------|-------------|
| O | 2.02908900  | 2.38672600 | -1.57338700 |
| O | -1.86102200 | 2.77746200 | 1.25421200  |
| N | 1.19044000  | 0.50024400 | -0.66504600 |
| N | -1.16466100 | 0.69431800 | 0.72049900  |
| C | 1.08956800  | 1.77316800 | -0.80656800 |

|   |             |             |             |
|---|-------------|-------------|-------------|
| C | 3.49984900  | -0.32859500 | -0.30669700 |
| C | 5.21612600  | 0.24279000  | 1.31513900  |
| H | 5.81167600  | 0.99690000  | 1.82312000  |
| C | -0.98088700 | 1.96578300  | 0.60930100  |
| C | 4.27326100  | 0.63054500  | 0.36281900  |
| H | 4.13964400  | 1.68816900  | 0.14674900  |
| C | -3.50570300 | -0.13516500 | 0.67345300  |
| C | 2.79888600  | 1.31529800  | -2.18530100 |
| H | 3.85085900  | 1.60018400  | -2.16449800 |
| H | 2.46244500  | 1.21622000  | -3.22245800 |
| C | -3.87848600 | -1.46734500 | 0.87882400  |
| H | -3.37502300 | -2.05435700 | 1.64240200  |
| C | 2.45589700  | 0.07327900  | -1.33587300 |
| H | 2.21735200  | -0.78845600 | -1.96231100 |
| C | -2.41148400 | 0.48809800  | 1.51936400  |
| H | -2.16759500 | -0.18950700 | 2.34124900  |
| C | 5.39358300  | -1.11022800 | 1.61333100  |
| H | 6.12954800  | -1.41316900 | 2.35342300  |
| C | -2.71066900 | 1.91223700  | 2.04763600  |
| H | -3.74483700 | 2.22843300  | 1.90476700  |
| H | -2.42907900 | 2.03790800  | 3.09784900  |
| C | 3.67512100  | -1.68204900 | 0.00664900  |
| H | 3.04962900  | -2.42769300 | -0.47613100 |
| C | 0.06647800  | 2.70476700  | -0.19609600 |
| C | -4.87828100 | -2.05317400 | 0.09968200  |
| H | -5.15135000 | -3.09119600 | 0.26667200  |
| C | -4.14943900 | 0.60355500  | -0.32992300 |
| H | -3.86628900 | 1.63868600  | -0.50873000 |
| C | 0.81393100  | 3.70258800  | 0.73245600  |
| H | 1.33013600  | 3.17143800  | 1.53891700  |
| H | 0.10099900  | 4.40215500  | 1.17520300  |
| H | 1.55320100  | 4.26300500  | 0.15463300  |
| C | 4.61789600  | -2.06962400 | 0.96068100  |
| H | 4.74137400  | -3.12344300 | 1.19463800  |
| C | -5.14874300 | 0.02109500  | -1.10785500 |
| H | -5.63920000 | 0.60445900  | -1.88255400 |
| C | -5.51673200 | -1.30995500 | -0.89309600 |
| H | -6.29432500 | -1.76488200 | -1.50056800 |

|    |             |             |             |
|----|-------------|-------------|-------------|
| C  | -0.65309100 | 3.48476200  | -1.33259500 |
| H  | 0.07939700  | 4.04423100  | -1.91970700 |
| H  | -1.37521800 | 4.18372100  | -0.90270400 |
| H  | -1.18380600 | 2.79694200  | -1.99916000 |
| Ni | -0.11564900 | -0.69485700 | 0.02194100  |
| Br | 0.03060500  | -2.93743400 | -0.38576900 |

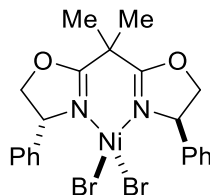

**1 Ni<sup>II</sup>Br<sub>2</sub>(Ph-BOX) triplet**

|    |             |             |             |
|----|-------------|-------------|-------------|
| Br | -0.34301300 | -2.26084000 | -1.34456400 |
| Br | 0.40514000  | -0.57140000 | 2.54683100  |
| Ni | -0.02220500 | -0.51151400 | 0.21097800  |
| O  | 2.01652000  | 2.47440800  | -1.83465700 |
| O  | -2.03152100 | 3.09260600  | 0.58552600  |
| N  | 1.22535100  | 0.65236000  | -0.79933200 |
| N  | -1.34576600 | 0.97894500  | 0.29127800  |
| C  | 1.13105000  | 1.91540800  | -0.98844300 |
| C  | 3.43229000  | -0.49849400 | -0.71250100 |
| C  | 5.21509700  | -0.30695700 | 0.92308700  |
| H  | 5.83718000  | 0.31153800  | 1.56423900  |
| C  | -1.08810800 | 2.22795100  | 0.16693400  |
| C  | 4.24589700  | 0.28640100  | 0.11601900  |
| H  | 4.11891400  | 1.36686900  | 0.14178200  |
| C  | -3.60238500 | -0.13195800 | 0.27566800  |
| C  | 2.81933500  | 1.38860000  | -2.38323100 |
| H  | 3.86954600  | 1.64564500  | -2.23939800 |
| H  | 2.59714200  | 1.32827900  | -3.45153500 |
| C  | -4.18729400 | -1.17248700 | 1.00437500  |
| H  | -3.92926300 | -1.30490600 | 2.05218800  |
| C  | 2.37037900  | 0.13013800  | -1.59628100 |
| H  | 1.96471800  | -0.63441800 | -2.26257000 |
| C  | -2.66186600 | 0.83215300  | 0.96720000  |

|   |             |             |             |
|---|-------------|-------------|-------------|
| H | -2.43884000 | 0.45766400  | 1.97181000  |
| C | 5.37995500  | -1.69438600 | 0.91193400  |
| H | 6.13373000  | -2.15744700 | 1.54281700  |
| C | -3.16972000 | 2.29676400  | 1.02037400  |
| H | -3.99184200 | 2.48537500  | 0.32514000  |
| H | -3.44654200 | 2.63165200  | 2.02132100  |
| C | 3.59672700  | -1.88811600 | -0.71128700 |
| H | 2.94531100  | -2.50321200 | -1.32587500 |
| C | 0.19006500  | 2.89274100  | -0.30941400 |
| C | -5.08685900 | -2.04744800 | 0.39204800  |
| H | -5.53025500 | -2.85479500 | 0.96804700  |
| C | -3.92373000 | 0.01692600  | -1.08011800 |
| H | -3.45762400 | 0.80697500  | -1.66427600 |
| C | 0.92367800  | 3.43829000  | 0.95505600  |
| H | 1.13865000  | 2.62624700  | 1.65642100  |
| H | 0.29432400  | 4.18220700  | 1.45105000  |
| H | 1.86147500  | 3.91550400  | 0.65487600  |
| C | 4.56760800  | -2.48298000 | 0.09683400  |
| H | 4.68249200  | -3.56320900 | 0.09227300  |
| C | -4.81737500 | -0.85852300 | -1.69372700 |
| H | -5.04950600 | -0.74144600 | -2.74863100 |
| C | -5.40433000 | -1.89081500 | -0.95703800 |
| H | -6.09831000 | -2.57525400 | -1.43707500 |
| C | -0.15793500 | 4.05491600  | -1.27039900 |
| H | 0.75402400  | 4.57302900  | -1.57233700 |
| H | -0.82063600 | 4.76161400  | -0.76771500 |
| H | -0.65937200 | 3.68891700  | -2.17241400 |

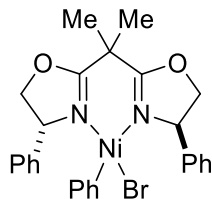

**2 Ni<sup>II</sup>PhBr(Ph-BOX) singlet**

|   |             |            |             |
|---|-------------|------------|-------------|
| O | 2.66918300  | 2.81231100 | -0.72684500 |
| O | -1.44320100 | 2.90433300 | 1.69615300  |

|   |             |             |             |
|---|-------------|-------------|-------------|
| N | 1.48831100  | 0.89661800  | -0.62785200 |
| N | -0.89660700 | 0.93280100  | 0.75124200  |
| C | 1.56505900  | 2.14045000  | -0.32857600 |
| C | 3.63678800  | -0.30790900 | -0.26573100 |
| C | 5.05574700  | -0.47006100 | 1.70184800  |
| H | 5.56040700  | 0.01122000  | 2.53559700  |
| C | -0.58510000 | 2.16895200  | 0.95760700  |
| C | 4.29245000  | 0.29419600  | 0.81921200  |
| H | 4.21224200  | 1.36738600  | 0.97861200  |
| C | -3.34756800 | 0.61973400  | 0.27946200  |
| C | 3.39832200  | 1.89094100  | -1.58897000 |
| C | -4.46464200 | -0.18244800 | 0.54555800  |
| H | -4.48756400 | -0.78544100 | 1.44963200  |
| C | 2.80627100  | 0.51457200  | -1.24045800 |
| H | 2.59097400  | -0.07683200 | -2.12976300 |
| C | -2.25942500 | 0.72813900  | 1.33628100  |
| H | -2.24041800 | -0.18546000 | 1.92885000  |
| C | 5.17242400  | -1.84913000 | 1.51188800  |
| H | 5.76746500  | -2.44546000 | 2.19846800  |
| C | -2.41965800 | 1.97496700  | 2.23138500  |
| C | 3.75377700  | -1.69201000 | -0.44443700 |
| H | 3.21838700  | -2.16722800 | -1.26065900 |
| C | 0.59133400  | 2.97586500  | 0.45960900  |
| C | -5.53226600 | -0.23530100 | -0.35023000 |
| H | -6.38798900 | -0.86825300 | -0.13147000 |
| C | -3.31503800 | 1.36016700  | -0.90753800 |
| H | -2.44845700 | 1.96972000  | -1.14550300 |
| C | 1.34040700  | 3.58133600  | 1.68051200  |
| H | 1.73594000  | 2.79142600  | 2.32765500  |
| H | 0.65387900  | 4.19941400  | 2.26300900  |
| H | 2.17290400  | 4.19785800  | 1.33449900  |
| C | 4.51850000  | -2.45659000 | 0.43915300  |
| H | 4.59743500  | -3.52971500 | 0.28862000  |
| C | -4.37860000 | 1.30119900  | -1.81010900 |
| H | -4.33227900 | 1.87205600  | -2.73351400 |
| C | -5.49242100 | 0.50783500  | -1.53185000 |
| H | -6.31877200 | 0.46022400  | -2.23576600 |
| C | 0.05625400  | 4.12169400  | -0.44624600 |

|    |             |             |             |
|----|-------------|-------------|-------------|
| H  | 0.89404000  | 4.73085700  | -0.79414600 |
| H  | -0.63540400 | 4.75165800  | 0.11767800  |
| H  | -0.46663600 | 3.71880300  | -1.31980900 |
| Ni | 0.01921200  | -0.38670700 | -0.27824900 |
| C  | -0.93676700 | -1.80497800 | 0.49468300  |
| C  | -0.49632400 | -2.15182900 | 1.78674400  |
| C  | -1.98555700 | -2.56376200 | -0.04728200 |
| C  | -1.07757200 | -3.20244200 | 2.50734200  |
| H  | 0.31607000  | -1.59442700 | 2.25444200  |
| C  | -2.57961400 | -3.60662400 | 0.66943900  |
| H  | -2.33757400 | -2.34855800 | -1.05207400 |
| C  | -2.12909600 | -3.93252600 | 1.95168800  |
| H  | -0.70728900 | -3.44885400 | 3.50097900  |
| H  | -3.39216300 | -4.17405500 | 0.21929100  |
| H  | -2.58645300 | -4.74886100 | 2.50607200  |
| Br | 0.48301800  | -1.66182200 | -2.16710300 |
| H  | 3.19980500  | 2.18513700  | -2.62466900 |
| H  | 4.46046200  | 1.99443900  | -1.36809500 |
| H  | -3.40141600 | 2.44425400  | 2.16982400  |
| H  | -2.15708700 | 1.78453200  | 3.27770400  |

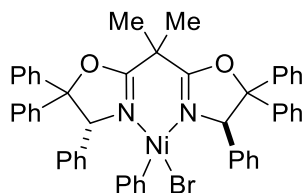

**$2^{\text{Ph}}$  Ni<sup>II</sup>PhBr(Ph-BOX<sup>Ph</sup>) singlet**

|   |             |             |             |
|---|-------------|-------------|-------------|
| O | -2.59122400 | 0.97026500  | -1.65530900 |
| O | 2.18016000  | 0.87570900  | -1.93257700 |
| N | -1.46662200 | 0.12222300  | 0.09559800  |
| N | 1.27158200  | -0.02329000 | -0.08371100 |
| C | -1.41823900 | 0.66396100  | -1.06621700 |
| C | -3.21003400 | -1.62651700 | 0.22007100  |
| C | -3.25202300 | -3.67434600 | -1.08709300 |
| H | -3.06326300 | -4.19069300 | -2.02469500 |
| C | 1.08116100  | 0.56814500  | -1.21591200 |



|    |             |             |             |
|----|-------------|-------------|-------------|
| C  | -2.96953900 | -2.31339400 | -0.97853500 |
| H  | -2.56752700 | -1.78514100 | -1.83816900 |
| C  | 3.19978300  | 1.00887100  | 1.11465800  |
| C  | -3.62158100 | 0.85036800  | -0.58729700 |
| C  | 4.33633300  | 0.76194200  | 1.89585100  |
| H  | 4.84144700  | -0.19675600 | 1.81716100  |
| C  | -2.90633400 | -0.14497000 | 0.38481400  |
| H  | -3.09771000 | 0.11731100  | 1.42189100  |
| C  | 2.74837900  | -0.05836200 | 0.12673700  |
| H  | 3.01898000  | -1.02687800 | 0.53771100  |
| C  | -3.77608300 | -4.37164200 | 0.00432700  |
| H  | -3.99271800 | -5.43330100 | -0.07955300 |
| C  | 3.29586700  | 0.10643200  | -1.33416000 |
| C  | -3.72468400 | -2.33704700 | 1.31095100  |
| H  | -3.86962600 | -1.82531300 | 2.25763100  |
| C  | -0.20153300 | 1.00216400  | -1.88706100 |
| C  | 4.81565400  | 1.72341800  | 2.78383300  |
| H  | 5.69701300  | 1.51114400  | 3.38290300  |
| C  | 2.54171900  | 2.23519700  | 1.25730900  |
| H  | 1.63981900  | 2.43966500  | 0.68949700  |
| C  | -0.31228900 | 0.28267800  | -3.26109700 |
| H  | -0.35626100 | -0.80364600 | -3.13273400 |
| H  | 0.56015900  | 0.52189300  | -3.87263300 |
| H  | -1.21532400 | 0.61369600  | -3.77927900 |
| C  | -4.00921400 | -3.69976000 | 1.20419800  |
| H  | -4.40083800 | -4.23593900 | 2.06423700  |
| C  | 3.01420600  | 3.19714200  | 2.15248600  |
| H  | 2.48275900  | 4.13909200  | 2.25771600  |
| C  | 4.15532500  | 2.94693500  | 2.91460200  |
| H  | 4.52082300  | 3.69399000  | 3.61395500  |
| C  | -0.15790500 | 2.54129200  | -2.10567500 |
| H  | -1.07711600 | 2.86363000  | -2.60023400 |
| H  | 0.69796700  | 2.80512900  | -2.73135900 |
| H  | -0.07778400 | 3.07228500  | -1.15179400 |
| Ni | 0.00364200  | -0.48848800 | 1.26205600  |
| C  | 1.19087200  | -1.64080100 | 2.14974300  |
| C  | 1.23594400  | -2.94120200 | 1.61018500  |
| C  | 1.99206400  | -1.38909200 | 3.27428000  |

|    |             |             |             |
|----|-------------|-------------|-------------|
| C  | 2.05342700  | -3.93908200 | 2.15678400  |
| H  | 0.61647500  | -3.19619500 | 0.74994800  |
| C  | 2.82035400  | -2.37554100 | 3.81867500  |
| H  | 1.96152200  | -0.41081900 | 3.74568800  |
| C  | 2.85784000  | -3.65655900 | 3.26167900  |
| H  | 2.05552300  | -4.93727600 | 1.72202100  |
| H  | 3.42980500  | -2.14511800 | 4.69066900  |
| H  | 3.49599000  | -4.42599600 | 3.69005000  |
| Br | -1.21694300 | -0.18143500 | 3.22257100  |
| C  | 4.57546900  | 0.91674300  | -1.46516600 |
| C  | 5.81091800  | 0.27603400  | -1.29450300 |
| C  | 4.55573900  | 2.29175000  | -1.72311900 |
| C  | 7.00097200  | 0.99831300  | -1.36961100 |
| H  | 5.84232700  | -0.79406300 | -1.11055100 |
| C  | 5.74901200  | 3.01161000  | -1.80997400 |
| H  | 3.60761800  | 2.79896000  | -1.85859800 |
| C  | 6.97447900  | 2.36987700  | -1.63068800 |
| H  | 7.94928300  | 0.48603500  | -1.23185600 |
| H  | 5.71668400  | 4.07798000  | -2.01673000 |
| H  | 7.90189400  | 2.93217300  | -1.69678700 |
| C  | 3.36687000  | -1.19845300 | -2.14215900 |
| C  | 3.69412400  | -1.09616900 | -3.50601200 |
| C  | 3.08547300  | -2.46372400 | -1.61465400 |
| C  | 3.74019400  | -2.22535200 | -4.31831200 |
| H  | 3.91788700  | -0.12029600 | -3.92702700 |
| C  | 3.13914100  | -3.59933800 | -2.43123200 |
| H  | 2.81349100  | -2.59535700 | -0.57318300 |
| C  | 3.46474100  | -3.48649900 | -3.78057600 |
| H  | 3.99709100  | -2.12298300 | -5.36929800 |
| H  | 2.92056100  | -4.57231200 | -1.99996000 |
| H  | 3.50586700  | -4.37096400 | -4.41059900 |
| C  | -3.77823900 | 2.26778100  | -0.01209400 |
| C  | -3.20097000 | 2.67022700  | 1.20147900  |
| C  | -4.47103400 | 3.22167400  | -0.77681800 |
| C  | -3.32877200 | 3.99305100  | 1.63799400  |
| H  | -2.64638500 | 1.97662100  | 1.82668300  |
| C  | -4.59068100 | 4.53923600  | -0.34175900 |
| H  | -4.92501200 | 2.92485200  | -1.71742400 |

|   |             |             |             |
|---|-------------|-------------|-------------|
| C | -4.02080600 | 4.92994800  | 0.87295700  |
| H | -2.88110100 | 4.28181700  | 2.58495200  |
| H | -5.13478500 | 5.25883300  | -0.94786200 |
| H | -4.11926800 | 5.95550400  | 1.21899400  |
| C | -4.91595300 | 0.34434400  | -1.19841600 |
| C | -6.02755900 | 0.17027700  | -0.36109800 |
| C | -5.04288700 | 0.06026100  | -2.56143200 |
| C | -7.23619500 | -0.29308700 | -0.87567900 |
| H | -5.94728600 | 0.40375900  | 0.69711500  |
| C | -6.25871700 | -0.39709400 | -3.07773000 |
| H | -4.19294800 | 0.19818000  | -3.22006700 |
| C | -7.35685600 | -0.57838900 | -2.23847300 |
| H | -8.08575500 | -0.42810300 | -0.21192700 |
| H | -6.34230900 | -0.61118700 | -4.13999300 |
| H | -8.30075100 | -0.93613800 | -2.64055500 |

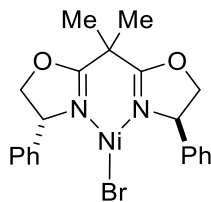

**TS\_bending**

|   |             |             |             |
|---|-------------|-------------|-------------|
| O | -1.92736600 | 2.58679400  | 1.45124000  |
| O | 1.92826100  | 2.58400100  | -1.45372500 |
| N | -1.16627200 | 0.59298400  | 0.71396700  |
| N | 1.16635900  | 0.59162500  | -0.71354600 |
| C | -1.02472600 | 1.87231300  | 0.72712900  |
| C | -3.50045100 | -0.21799000 | 0.51343800  |
| C | -5.23697700 | 0.20377000  | -1.13181900 |
| H | -5.82473700 | 0.90812200  | -1.71464200 |
| C | 1.02525500  | 1.87094300  | -0.72869200 |
| C | -4.26476100 | 0.67596600  | -0.25009300 |
| H | -4.09979400 | 1.74758700  | -0.16354300 |
| C | 3.50037100  | -0.21917000 | -0.51066800 |
| C | -2.71652800 | 1.61015400  | 2.17998700  |
| H | -3.76091500 | 1.92056400  | 2.14140900  |

|    |             |             |             |
|----|-------------|-------------|-------------|
| H  | -2.36989000 | 1.60958800  | 3.21852100  |
| C  | 3.71532000  | -1.59414300 | -0.35991600 |
| H  | 3.10279000  | -2.29791900 | -0.91626800 |
| C  | -2.42194900 | 0.27515200  | 1.46258500  |
| H  | -2.18646300 | -0.51477400 | 2.17925500  |
| C  | 2.42222400  | 0.27223400  | -1.46115400 |
| H  | 2.18687300  | -0.51905200 | -2.17635400 |
| C  | -5.45315500 | -1.16992300 | -1.26482700 |
| H  | -6.21119100 | -1.53828000 | -1.95086600 |
| C  | 2.71708100  | 1.60587100  | -2.18092400 |
| H  | 3.76154200  | 1.91610500  | -2.14306800 |
| H  | 2.37024200  | 1.60359500  | -3.21939100 |
| C  | -3.71644600 | -1.59317200 | 0.36624500  |
| H  | -3.10457500 | -2.29598800 | 0.92453300  |
| C  | 0.00028700  | 2.71326100  | -0.00155200 |
| C  | 4.68616900  | -2.06572000 | 0.52551700  |
| H  | 4.83761100  | -3.13587200 | 0.63476100  |
| C  | 4.26528600  | 0.67618300  | 0.25061200  |
| H  | 4.10110000  | 1.74769900  | 0.16134900  |
| C  | -0.74814600 | 3.60711900  | -1.03007200 |
| H  | -1.28314900 | 2.99291100  | -1.76181700 |
| H  | -0.03262700 | 4.23966100  | -1.56104800 |
| H  | -1.47104400 | 4.24227400  | -0.51178200 |
| C  | -4.68765000 | -2.06633700 | -0.51795200 |
| H  | -4.83986900 | -3.13665400 | -0.62444700 |
| C  | 5.23714400  | 0.20554500  | 1.13357800  |
| H  | 5.82539700  | 0.91096900  | 1.71460600  |
| C  | 5.45233200  | -1.16795300 | 1.27010000  |
| H  | 6.21010500  | -1.53509900 | 1.95708200  |
| C  | 0.74879000  | 3.60893300  | 1.02533100  |
| H  | 0.03331700  | 4.24248400  | 1.55515700  |
| H  | 1.47173200  | 4.24308800  | 0.50588300  |
| H  | 1.28376200  | 2.99602500  | 1.75818900  |
| Ni | -0.00086600 | -0.70758400 | 0.00022800  |
| Br | 0.00055600  | -2.99461400 | -0.00280300 |

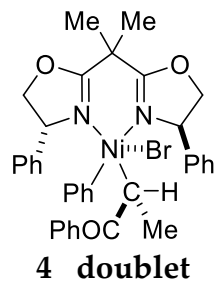

|   |             |             |             |
|---|-------------|-------------|-------------|
| O | -0.73360200 | -3.55384600 | 0.93471600  |
| O | 2.01640600  | -0.70923600 | 3.23218800  |
| N | -0.83715100 | -1.48455700 | 0.05901700  |
| N | 1.49118600  | -0.17646900 | 1.10809700  |
| C | -0.52481500 | -2.23106400 | 1.05675900  |
| C | -2.97583200 | -2.17493600 | -1.08066400 |
| C | -5.20726100 | -2.25125400 | -0.11680800 |
| H | -5.85210600 | -2.42090600 | 0.74137500  |
| C | 1.19843300  | -0.83935600 | 2.16794100  |
| C | -3.82565600 | -2.39011100 | 0.01553800  |
| H | -3.40719700 | -2.67604900 | 0.97788800  |
| C | 3.94583600  | -0.25785500 | 0.57822200  |
| C | -1.07415200 | -3.77430300 | -0.46651200 |
| C | 4.67362000  | 0.44540000  | -0.38647800 |
| H | 4.39961500  | 1.47047100  | -0.61976900 |
| C | -1.47295200 | -2.37254900 | -0.96994300 |
| H | -0.98803500 | -2.15838300 | -1.92349400 |
| C | 2.83788900  | 0.44500100  | 1.34379500  |
| H | 2.79082000  | 1.48730500  | 1.03553500  |
| C | -5.76120100 | -1.89759800 | -1.35005900 |
| H | -6.83709700 | -1.78694400 | -1.45276500 |
| C | 2.97033100  | 0.33207300  | 2.87685100  |
| C | -3.54288000 | -1.82671300 | -2.31270700 |
| H | -2.89531700 | -1.65585200 | -3.16869600 |
| C | 0.02813200  | -1.77661200 | 2.39717900  |
| C | 5.72974600  | -0.16674900 | -1.06363300 |
| H | 6.28167000  | 0.39028500  | -1.81577000 |
| C | 4.29414600  | -1.58678900 | 0.85626100  |
| H | 3.74153700  | -2.15061200 | 1.60466700  |
| C | -1.07606900 | -1.01341500 | 3.18052200  |

|    |             |             |             |
|----|-------------|-------------|-------------|
| H  | -1.45153800 | -0.15507500 | 2.61901500  |
| H  | -0.67079800 | -0.66514300 | 4.13528700  |
| H  | -1.91405400 | -1.68723800 | 3.38825100  |
| C  | -4.92600500 | -1.68712200 | -2.44762200 |
| H  | -5.34777300 | -1.41076900 | -3.40993000 |
| C  | 5.34683600  | -2.20028100 | 0.17986600  |
| H  | 5.60307100  | -3.23278400 | 0.40215800  |
| C  | 6.06879400  | -1.49007800 | -0.78265600 |
| H  | 6.88817700  | -1.96874300 | -1.31215200 |
| C  | 0.50211500  | -2.99056100 | 3.23135800  |
| H  | -0.33628400 | -3.66906000 | 3.40295600  |
| H  | 0.88547800  | -2.64737500 | 4.19362700  |
| H  | 1.29053000  | -3.54879500 | 2.71915700  |
| Ni | 0.17178800  | 0.29063100  | -0.45283400 |
| C  | 0.92112300  | 2.03900100  | -0.58778400 |
| C  | 0.77267900  | 2.91331700  | 0.49987200  |
| C  | 1.73868000  | 2.43181400  | -1.65231500 |
| C  | 1.44257900  | 4.14137700  | 0.53418900  |
| H  | 0.12295100  | 2.65442600  | 1.33412500  |
| C  | 2.40622500  | 3.66177800  | -1.62089600 |
| H  | 1.87034200  | 1.77075700  | -2.50238900 |
| C  | 2.26549400  | 4.51932100  | -0.52792400 |
| H  | 1.31155500  | 4.80302300  | 1.38791600  |
| H  | 3.03716200  | 3.94860500  | -2.45944300 |
| H  | 2.78207900  | 5.47560100  | -0.50877500 |
| Br | 1.44008600  | -1.03656100 | -2.16095200 |
| H  | -0.17571800 | -4.15194500 | -0.96208200 |
| H  | -1.87576500 | -4.51188000 | -0.50189500 |
| H  | 3.95504800  | 0.01262400  | 3.21723500  |
| H  | 2.66686400  | 1.24556100  | 3.39859200  |
| C  | -1.38855400 | 1.07560800  | -1.47252800 |
| H  | -2.09505700 | 0.27662300  | -1.23766800 |
| C  | -1.16291900 | 1.15548700  | -2.97670700 |
| H  | -0.45850100 | 1.95033900  | -3.22902800 |
| H  | -0.77657700 | 0.21563000  | -3.37479100 |
| H  | -2.10980600 | 1.39751000  | -3.48066100 |
| C  | -1.92837000 | 2.37064300  | -0.93700900 |
| C  | -2.65595200 | 2.41002800  | 0.39083800  |

|   |             |            |             |
|---|-------------|------------|-------------|
| C | -3.21869900 | 1.28412900 | 1.00931000  |
| C | -2.82569600 | 3.66648400 | 0.99650800  |
| C | -3.93202700 | 1.41323300 | 2.20485400  |
| H | -3.13164000 | 0.30484400 | 0.55204000  |
| C | -3.52021300 | 3.79310900 | 2.19628400  |
| H | -2.40491100 | 4.53137700 | 0.49450100  |
| C | -4.07900100 | 2.66436900 | 2.80492600  |
| H | -4.38197600 | 0.53420000 | 2.65992800  |
| H | -3.63550200 | 4.77174300 | 2.65527600  |
| H | -4.63191900 | 2.76234800 | 3.73576000  |
| O | -1.82119000 | 3.41989100 | -1.56266000 |

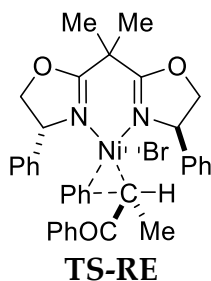

|   |             |             |             |
|---|-------------|-------------|-------------|
| O | -0.45124100 | -3.71059800 | 0.80354800  |
| O | 2.14945800  | -0.72238700 | 3.17546800  |
| N | -0.74562000 | -1.60431400 | 0.05630000  |
| N | 1.59863200  | -0.22824100 | 1.04945700  |
| C | -0.32938000 | -2.38141700 | 0.98873400  |
| C | -2.82035400 | -2.26119900 | -1.17182200 |
| C | -5.09173700 | -2.46127700 | -0.32897800 |
| H | -5.77739300 | -2.77554000 | 0.45349200  |
| C | 1.35401200  | -0.92116700 | 2.10085100  |
| C | -3.72028600 | -2.65763400 | -0.17065900 |
| H | -3.34693500 | -3.12517700 | 0.73833000  |
| C | 4.03216700  | -0.05868800 | 0.51202500  |
| C | -0.91163200 | -3.89073600 | -0.56606900 |
| C | 4.63416100  | 0.69633100  | -0.49898300 |
| H | 4.23731500  | 1.67888700  | -0.73777800 |
| C | -1.32516200 | -2.47051900 | -1.01814600 |
| H | -0.81572100 | -2.20378200 | -1.94730900 |

|    |             |             |             |
|----|-------------|-------------|-------------|
| C  | 2.86940300  | 0.52174800  | 1.29894200  |
| H  | 2.71423100  | 1.56031400  | 1.00774400  |
| C  | -5.58389900 | -1.86301800 | -1.49261100 |
| H  | -6.65220500 | -1.70804500 | -1.61532700 |
| C  | 3.01488600  | 0.39718100  | 2.83156600  |
| C  | -3.32442100 | -1.66750900 | -2.33527000 |
| H  | -2.63589300 | -1.36278100 | -3.11957500 |
| C  | 0.26240000  | -1.95469200 | 2.32294000  |
| C  | 5.72370200  | 0.18964300  | -1.20965400 |
| H  | 6.17705800  | 0.78567200  | -1.99689700 |
| C  | 4.53815800  | -1.33415900 | 0.79960400  |
| H  | 4.08307300  | -1.93739600 | 1.58232800  |
| C  | -0.85507500 | -1.31707300 | 3.19515400  |
| H  | -1.32125600 | -0.46649800 | 2.69207600  |
| H  | -0.43219600 | -0.98167700 | 4.14662400  |
| H  | -1.62883300 | -2.06314100 | 3.40507500  |
| C  | -4.69811500 | -1.46711900 | -2.49488900 |
| H  | -5.07312800 | -1.00300800 | -3.40281200 |
| C  | 5.62488400  | -1.84253200 | 0.09011300  |
| H  | 6.00525200  | -2.83392200 | 0.32172000  |
| C  | 6.22187600  | -1.07972400 | -0.91681400 |
| H  | 7.06784200  | -1.47630500 | -1.47172800 |
| C  | 0.86605000  | -3.16972800 | 3.06751100  |
| H  | 0.09006800  | -3.91766600 | 3.24446400  |
| H  | 1.27492500  | -2.84643800 | 4.02635100  |
| H  | 1.66406900  | -3.64051000 | 2.48652400  |
| Ni | 0.28705000  | 0.22666700  | -0.47805600 |
| C  | 0.50651900  | 2.12261000  | -0.49346500 |
| C  | 0.33055800  | 2.73374100  | 0.77090800  |
| C  | 1.41189400  | 2.73669100  | -1.38323600 |
| C  | 1.07095500  | 3.85551200  | 1.14857800  |
| H  | -0.39982600 | 2.33741700  | 1.47143500  |
| C  | 2.14151100  | 3.86475300  | -1.00700800 |
| H  | 1.57055700  | 2.30116800  | -2.36281400 |
| C  | 1.98317500  | 4.43215100  | 0.26186400  |
| H  | 0.91546200  | 4.29082500  | 2.13350500  |
| H  | 2.84130900  | 4.30379900  | -1.71475000 |
| H  | 2.54590000  | 5.31724200  | 0.54553200  |



|    |             |             |             |
|----|-------------|-------------|-------------|
| Br | 1.41563700  | -0.76827900 | -2.42449500 |
| H  | -0.07028900 | -4.28359900 | -1.14262300 |
| H  | -1.72870800 | -4.61324300 | -0.55139300 |
| H  | 4.02343600  | 0.15478800  | 3.16661200  |
| H  | 2.64083500  | 1.27746500  | 3.36364600  |
| C  | -1.22477800 | 1.53553000  | -1.39801800 |
| H  | -1.66732800 | 0.53923500  | -1.27875600 |
| C  | -1.03761500 | 1.82937300  | -2.88038800 |
| H  | -0.71294500 | 2.85968700  | -3.03437900 |
| H  | -0.31969200 | 1.14122900  | -3.33084200 |
| H  | -2.00144100 | 1.71277100  | -3.39449200 |
| C  | -2.12471400 | 2.55579600  | -0.74699700 |
| C  | -2.91568900 | 2.23329800  | 0.49678700  |
| C  | -3.19578500 | 0.93132600  | 0.93431900  |
| C  | -3.44904800 | 3.31762300  | 1.21476300  |
| C  | -3.99130700 | 0.72050900  | 2.06400000  |
| H  | -2.82068200 | 0.07200200  | 0.39166000  |
| C  | -4.22582200 | 3.10760800  | 2.35019800  |
| H  | -3.24124100 | 4.31890300  | 0.85278900  |
| C  | -4.50214100 | 1.80494200  | 2.77817700  |
| H  | -4.21976500 | -0.29542800 | 2.37526600  |
| H  | -4.62399900 | 3.95706000  | 2.89908000  |
| H  | -5.11780200 | 1.63805900  | 3.65840400  |
| O  | -2.24270900 | 3.67418100  | -1.23436300 |

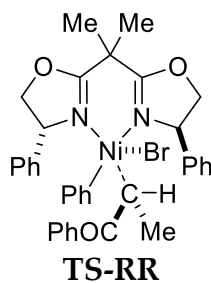

|   |             |             |            |
|---|-------------|-------------|------------|
| O | -0.37348600 | -3.17420800 | 2.11083900 |
| O | 2.20608600  | 0.38243000  | 3.29177700 |
| N | -0.44186300 | -1.60140400 | 0.50136900 |
| N | 1.68547300  | 0.17841600  | 1.11604800 |

|   |             |             |             |
|---|-------------|-------------|-------------|
| C | -0.21177000 | -1.89467600 | 1.73069800  |
| C | -2.25851300 | -2.79301400 | -0.76871700 |
| C | -4.67172300 | -2.73578400 | -0.48707700 |
| H | -5.53960200 | -2.71323500 | 0.16667300  |
| C | 1.40410400  | -0.11606900 | 2.33198900  |
| C | -3.38882700 | -2.75915300 | 0.06119200  |
| H | -3.26887000 | -2.75168200 | 1.14282400  |
| C | 4.09733400  | 0.13790600  | 0.49654500  |
| C | -0.66405100 | -3.93445000 | 0.90431700  |
| C | 4.57737200  | 0.48309200  | -0.77100200 |
| H | 4.12075200  | 1.31013600  | -1.30783200 |
| C | -0.85516200 | -2.85951900 | -0.19522900 |
| H | -0.14727500 | -3.00087500 | -1.01428700 |
| C | 2.96927800  | 0.94299900  | 1.11528000  |
| H | 2.80745000  | 1.85003800  | 0.53261900  |
| C | -4.83961100 | -2.74353700 | -1.87487500 |
| H | -5.83841900 | -2.72570200 | -2.30207500 |
| C | 3.14207600  | 1.27470800  | 2.61552400  |
| C | -2.43636500 | -2.79861500 | -2.15758400 |
| H | -1.56251200 | -2.80612600 | -2.80349000 |
| C | 0.22247800  | -0.93231400 | 2.82805100  |
| C | 5.61902500  | -0.24072200 | -1.35376100 |
| H | 5.97856400  | 0.03477600  | -2.34110300 |
| C | 4.66999300  | -0.95051900 | 1.16938300  |
| H | 4.30342400  | -1.23828900 | 2.15295700  |
| C | -0.94326300 | 0.04747000  | 3.14350600  |
| H | -1.26433500 | 0.59768400  | 2.25637600  |
| H | -0.62322200 | 0.76152500  | 3.90826800  |
| H | -1.80223200 | -0.50968200 | 3.52943400  |
| C | -3.72027000 | -2.77391500 | -2.70766800 |
| H | -3.84327900 | -2.77769000 | -3.78712200 |
| C | 5.71042400  | -1.67439100 | 0.58837100  |
| H | 6.14728900  | -2.51529400 | 1.12054000  |
| C | 6.18914500  | -1.31801300 | -0.67502800 |
| H | 6.99977400  | -1.88177700 | -1.12875500 |
| C | 0.61438200  | -1.69883500 | 4.11073200  |
| H | -0.23936700 | -2.27671900 | 4.47128500  |
| H | 0.91403300  | -0.98880300 | 4.88362400  |

|    |             |             |             |
|----|-------------|-------------|-------------|
| H  | 1.44269100  | -2.39010800 | 3.93338700  |
| Ni | 0.42214300  | 0.06692700  | -0.47090800 |
| C  | 0.62553000  | 1.95582400  | -0.96174200 |
| C  | 0.44187000  | 2.94983600  | 0.02031900  |
| C  | 1.14652300  | 2.38615800  | -2.19450500 |
| C  | 0.74973800  | 4.29496700  | -0.20944300 |
| H  | 0.03545600  | 2.68345000  | 0.99763300  |
| C  | 1.46188200  | 3.72750700  | -2.43727400 |
| H  | 1.31011700  | 1.65780400  | -2.98468300 |
| C  | 1.26568800  | 4.68973500  | -1.44496600 |
| H  | 0.58473400  | 5.03286700  | 0.57397800  |
| H  | 1.86142600  | 4.02117300  | -3.40617800 |
| H  | 1.50531300  | 5.73357800  | -1.63327200 |
| Br | 1.31563400  | -1.20149600 | -2.33956100 |
| H  | 0.19241600  | -4.58795900 | 0.71898900  |
| H  | -1.55300100 | -4.53709300 | 1.09549100  |
| H  | 4.13857700  | 1.07013800  | 3.00695900  |
| H  | 2.84595000  | 2.29922400  | 2.85817000  |
| C  | -2.20433200 | 0.91461200  | -1.69229500 |
| H  | -2.33052600 | -0.03209100 | -1.17672400 |
| C  | -1.86020800 | 0.89663700  | -3.14118100 |
| H  | -1.63264400 | 1.90672900  | -3.48752900 |
| H  | -1.01450600 | 0.23178400  | -3.34630100 |
| H  | -2.71849900 | 0.52105500  | -3.72325900 |
| C  | -2.68141500 | 2.12931200  | -1.06514500 |
| C  | -3.23857700 | 2.08262200  | 0.33619200  |
| C  | -3.87487200 | 0.95279300  | 0.87115600  |
| C  | -3.18138300 | 3.25583900  | 1.10556400  |
| C  | -4.43515700 | 0.99420100  | 2.15054800  |
| H  | -3.96386600 | 0.04680700  | 0.27999000  |
| C  | -3.72073100 | 3.29027100  | 2.38957700  |
| H  | -2.71207900 | 4.13089600  | 0.66799200  |
| C  | -4.35234100 | 2.15872000  | 2.91641300  |
| H  | -4.94580700 | 0.11855600  | 2.54453100  |
| H  | -3.66097600 | 4.20247600  | 2.97791500  |
| H  | -4.78696400 | 2.18966900  | 3.91241100  |
| O  | -2.64785500 | 3.21952300  | -1.65617700 |

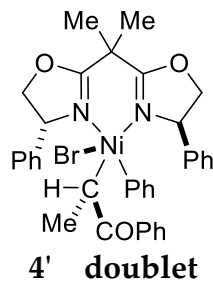

|   |             |             |             |
|---|-------------|-------------|-------------|
| O | -0.72039300 | 3.94309200  | -0.82554900 |
| O | -3.72156100 | 1.59245700  | 1.68284400  |
| N | 0.17546600  | 1.98627400  | -0.16920300 |
| N | -2.05601400 | 0.43629500  | 0.70359400  |
| C | -0.72245500 | 2.88602300  | 0.00739600  |
| C | 2.45005400  | 2.86861300  | -0.80326100 |
| C | 3.91025200  | 4.29361900  | 0.51763300  |
| H | 4.03335100  | 5.09247900  | 1.24405200  |
| C | -2.49390800 | 1.56613400  | 1.12613000  |
| C | 2.62999600  | 3.90056500  | 0.12968200  |
| H | 1.76452900  | 4.40346300  | 0.55569400  |
| C | -3.78392000 | -0.90501400 | -0.51971100 |
| C | 0.24729400  | 3.62814100  | -1.86900100 |
| C | -3.73335500 | -2.22755500 | -0.97039600 |
| H | -3.21497400 | -2.97433800 | -0.37548200 |
| C | 1.06597200  | 2.45946000  | -1.27745200 |
| H | 1.14135600  | 1.63875000  | -1.99295300 |
| C | -3.18150800 | -0.54534100 | 0.82742600  |
| H | -2.79619800 | -1.44523900 | 1.30352000  |
| C | 5.03212500  | 3.66155200  | -0.02559100 |
| H | 6.02982000  | 3.96607900  | 0.27831000  |
| C | -4.15096700 | 0.20264000  | 1.76928600  |
| C | 3.58081800  | 2.24648500  | -1.34528200 |
| H | 3.45464900  | 1.44606000  | -2.07015300 |
| C | -1.78678000 | 2.90889100  | 1.09373900  |
| C | -4.32332000 | -2.58602800 | -2.18371300 |
| H | -4.27035900 | -3.61643800 | -2.52428900 |
| C | -4.43547600 | 0.05596500  | -1.30496600 |
| H | -4.48572900 | 1.09019700  | -0.97105300 |
| C | -1.11250500 | 3.14787800  | 2.47444100  |

|    |             |             |             |
|----|-------------|-------------|-------------|
| H  | -0.36728300 | 2.38066200  | 2.69639900  |
| H  | -1.87493700 | 3.14156200  | 3.25921500  |
| H  | -0.61870600 | 4.12508100  | 2.48153500  |
| C  | 4.86472800  | 2.63806400  | -0.95866800 |
| H  | 5.73093700  | 2.13999400  | -1.38517800 |
| C  | -5.02326100 | -0.29949600 | -2.51764300 |
| H  | -5.52210500 | 0.45635600  | -3.11846700 |
| C  | -4.96941700 | -1.62385200 | -2.95967900 |
| H  | -5.42566700 | -1.90122600 | -3.90612000 |
| C  | -2.81735700 | 4.03058200  | 0.82762900  |
| H  | -2.31175000 | 4.99842800  | 0.80740200  |
| H  | -3.56669900 | 4.03646100  | 1.62096200  |
| H  | -3.32496000 | 3.89326500  | -0.13093100 |
| Ni | -0.03389800 | -0.03272100 | 0.40182300  |
| C  | -0.27436700 | -1.69845700 | 1.29572000  |
| C  | -0.53954300 | -1.67230300 | 2.67220100  |
| C  | -0.35917600 | -2.92203700 | 0.62139500  |
| C  | -0.91837000 | -2.83227100 | 3.35548300  |
| H  | -0.45174800 | -0.74557600 | 3.23726600  |
| C  | -0.73291400 | -4.08511500 | 1.30551900  |
| H  | -0.13946800 | -2.96912800 | -0.43983400 |
| C  | -1.01975700 | -4.04504000 | 2.67127900  |
| H  | -1.12179600 | -2.78758100 | 4.42320600  |
| H  | -0.79071600 | -5.02715800 | 0.76450700  |
| H  | -1.30495700 | -4.95090200 | 3.20023800  |
| Br | -0.24533000 | -0.61268700 | -2.02955400 |
| H  | -0.31898400 | 3.33645200  | -2.75799500 |
| H  | 0.82965000  | 4.52829600  | -2.06599600 |
| H  | -5.19543600 | 0.15704700  | 1.46140700  |
| H  | -4.05060000 | -0.10574600 | 2.81470100  |
| C  | 1.88359800  | -0.22773500 | 0.91546400  |
| H  | 2.34023100  | 0.20012500  | 0.01923900  |
| C  | 2.03045300  | 0.71723200  | 2.11208100  |
| H  | 3.07984700  | 0.75925100  | 2.43197500  |
| H  | 1.71648900  | 1.73346100  | 1.86721800  |
| H  | 1.47064700  | 0.35849900  | 2.98176300  |
| C  | 2.54269700  | -1.54623500 | 1.23502300  |
| C  | 3.11070400  | -2.41582800 | 0.14354200  |

|   |            |             |             |
|---|------------|-------------|-------------|
| C | 2.94362500 | -2.16429600 | -1.22576000 |
| C | 3.87853400 | -3.52377000 | 0.54127100  |
| C | 3.53189800 | -3.00440700 | -2.17386000 |
| H | 2.31448700 | -1.34883600 | -1.56424300 |
| C | 4.47070200 | -4.35557400 | -0.40384200 |
| H | 3.99520600 | -3.70597300 | 1.60434000  |
| C | 4.30024900 | -4.09613800 | -1.76796100 |
| H | 3.38011300 | -2.80577700 | -3.23166700 |
| H | 5.06462700 | -5.20715100 | -0.08110500 |
| H | 4.76042900 | -4.74577900 | -2.50865800 |
| O | 2.71372700 | -1.87992200 | 2.40525900  |

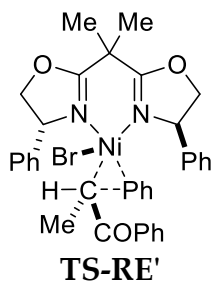

|   |             |             |             |
|---|-------------|-------------|-------------|
| O | -1.15486800 | 3.94165000  | -1.02790800 |
| O | -3.89837000 | 1.28354100  | 1.66195000  |
| N | -0.09755600 | 2.10916700  | -0.25142700 |
| N | -2.15048800 | 0.29735900  | 0.64280600  |
| C | -1.10657700 | 2.89561300  | -0.17804700 |
| C | 2.16572900  | 3.02588900  | -0.78940200 |
| C | 3.56542700  | 4.41399300  | 0.63123600  |
| H | 3.65838500  | 5.20771900  | 1.36774100  |
| C | -2.71914000 | 1.38753500  | 1.00705200  |
| C | 2.30544700  | 4.04967000  | 0.15878300  |
| H | 1.42296300  | 4.56326600  | 0.53479300  |
| C | -3.70607100 | -1.40575600 | -0.31570200 |
| C | -0.01919900 | 3.79755100  | -1.92531200 |
| C | -3.42246900 | -2.72500700 | -0.68143100 |
| H | -2.73282600 | -3.30905500 | -0.07840400 |
| C | 0.80212500  | 2.62788800  | -1.32324000 |
| H | 0.91440200  | 1.82057200  | -2.05183400 |

|    |             |             |             |
|----|-------------|-------------|-------------|
| C  | -3.09414700 | -0.82255900 | 0.94615200  |
| H  | -2.53746500 | -1.59809500 | 1.47284300  |
| C  | 4.70657200  | 3.75714800  | 0.16120100  |
| H  | 5.68858300  | 4.03893900  | 0.53104800  |
| C  | -4.10991100 | -0.13831600 | 1.88896200  |
| C  | 3.31455000  | 2.37688300  | -1.25635500 |
| H  | 3.21803800  | 1.58061300  | -1.99039100 |
| C  | -2.24992300 | 2.82094700  | 0.82124300  |
| C  | -4.00272700 | -3.28483100 | -1.82117600 |
| H  | -3.76811900 | -4.30932400 | -2.09670700 |
| C  | -4.58009000 | -0.65256600 | -1.11191800 |
| H  | -4.81109900 | 0.37639600  | -0.84433900 |
| C  | -1.74574500 | 3.35899600  | 2.19116700  |
| H  | -0.89864900 | 2.77369300  | 2.55938300  |
| H  | -2.55459000 | 3.31424000  | 2.92596900  |
| H  | -1.42981700 | 4.40183100  | 2.08485400  |
| C  | 4.57871700  | 2.73822600  | -0.78331300 |
| H  | 5.46002400  | 2.22101800  | -1.15220600 |
| C  | -5.15924900 | -1.20932000 | -2.25082200 |
| H  | -5.83250300 | -0.61321300 | -2.86115400 |
| C  | -4.87236600 | -2.52945300 | -2.60751100 |
| H  | -5.32175000 | -2.96338400 | -3.49667600 |
| C  | -3.44694900 | 3.67810000  | 0.34109600  |
| H  | -3.13597700 | 4.71860900  | 0.22877300  |
| H  | -4.25535300 | 3.62308100  | 1.07213100  |
| H  | -3.82382100 | 3.33014900  | -0.62520500 |
| Ni | -0.15877200 | 0.01186700  | 0.21410300  |
| C  | 0.20553700  | -1.46826600 | 1.36912800  |
| C  | -0.19081900 | -1.36473800 | 2.71942500  |
| C  | 0.21931500  | -2.76154300 | 0.79706300  |
| C  | -0.62198500 | -2.48081900 | 3.44128600  |
| H  | -0.17259200 | -0.40054100 | 3.21984800  |
| C  | -0.20334900 | -3.87345000 | 1.52285100  |
| H  | 0.53840000  | -2.88611900 | -0.23132200 |
| C  | -0.63192300 | -3.74458400 | 2.84944200  |
| H  | -0.93495500 | -2.35921600 | 4.47609800  |
| H  | -0.19299100 | -4.85181800 | 1.04756700  |
| H  | -0.94891500 | -4.61669900 | 3.41468900  |

|    |             |             |             |
|----|-------------|-------------|-------------|
| Br | -0.21774200 | -0.68401400 | -2.15809900 |
| H  | -0.41467300 | 3.57044000  | -2.91847600 |
| H  | 0.51409700  | 4.74951200  | -1.94428600 |
| H  | -5.15174600 | -0.36220200 | 1.65908700  |
| H  | -3.90652300 | -0.33672200 | 2.94600100  |
| C  | 1.80654400  | -0.26129300 | 1.03768300  |
| H  | 2.00797500  | 0.16271300  | 0.04758900  |
| C  | 1.92348300  | 0.80920000  | 2.12406400  |
| H  | 2.90225600  | 1.29896300  | 2.04761500  |
| H  | 1.16261400  | 1.58757400  | 2.02799600  |
| H  | 1.86787400  | 0.35749400  | 3.11493100  |
| C  | 2.82417200  | -1.35641300 | 1.29989400  |
| C  | 3.46660000  | -2.10883300 | 0.16801400  |
| C  | 3.10967700  | -1.95715200 | -1.18010900 |
| C  | 4.50599700  | -2.99508100 | 0.50162800  |
| C  | 3.77915000  | -2.67981000 | -2.17024200 |
| H  | 2.28394300  | -1.31725800 | -1.47538400 |
| C  | 5.17700300  | -3.70708700 | -0.48716800 |
| H  | 4.76788600  | -3.10315000 | 1.54873300  |
| C  | 4.81540500  | -3.54980400 | -1.82961300 |
| H  | 3.47975900  | -2.56269400 | -3.20828500 |
| H  | 5.98072800  | -4.38665200 | -0.21519400 |
| H  | 5.33698400  | -4.10736800 | -2.60371300 |
| O  | 3.18942400  | -1.57725900 | 2.44955000  |

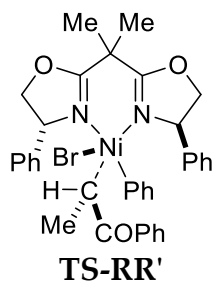

|   |             |             |             |
|---|-------------|-------------|-------------|
| O | -1.89311200 | 3.88005300  | -0.42272900 |
| O | -4.05909800 | 0.54025900  | 1.95955800  |
| N | -0.61029600 | 2.04560300  | -0.18418200 |
| N | -2.29455900 | -0.06761100 | 0.70902700  |



|   |             |             |             |
|---|-------------|-------------|-------------|
| C | -1.64022700 | 2.71299000  | 0.19518200  |
| C | 1.48183300  | 3.18971300  | -0.99475600 |
| C | 3.13156300  | 4.43841800  | 0.27753200  |
| H | 3.36903400  | 5.12870400  | 1.08251300  |
| C | -2.94740200 | 0.87882000  | 1.27689500  |
| C | 1.80490400  | 4.08207800  | 0.03735200  |
| H | 1.01743500  | 4.49960400  | 0.66189300  |
| C | -3.66336300 | -1.80381200 | -0.43650600 |
| C | -0.90649300 | 4.02046600  | -1.48225500 |
| C | -3.12828500 | -2.93415500 | -1.06306600 |
| H | -2.28426500 | -3.44676900 | -0.60961700 |
| C | 0.04391600  | 2.81037200  | -1.29221600 |
| H | 0.02678400  | 2.15226800  | -2.16350300 |
| C | -3.07851500 | -1.32997000 | 0.88149200  |
| H | -2.39683600 | -2.08628900 | 1.27028200  |
| C | 4.15321700  | 3.90697900  | -0.51465800 |
| H | 5.18708400  | 4.18264700  | -0.32623800 |
| C | -4.11482400 | -0.91724100 | 1.95067000  |
| C | 2.51164600  | 2.66211600  | -1.78328900 |
| H | 2.26772900  | 1.95637700  | -2.57285600 |
| C | -2.61192400 | 2.35909100  | 1.31253900  |
| C | -3.65817100 | -3.38935500 | -2.27173200 |
| H | -3.22985900 | -4.26540100 | -2.75043800 |
| C | -4.73324000 | -1.13025700 | -1.04251400 |
| H | -5.15752600 | -0.24505700 | -0.57245000 |
| C | -1.94302300 | 2.67778300  | 2.68101400  |
| H | -1.02277400 | 2.10453000  | 2.81857900  |
| H | -2.63562300 | 2.43526600  | 3.49217800  |
| H | -1.70385600 | 3.74462200  | 2.73618300  |
| C | 3.84108600  | 3.01869900  | -1.54446800 |
| H | 4.63053900  | 2.59591600  | -2.15925000 |
| C | -5.26327700 | -1.58419300 | -2.24949200 |
| H | -6.09333800 | -1.05414300 | -2.70901700 |
| C | -4.72704100 | -2.71783900 | -2.86567900 |
| H | -5.13899100 | -3.07181900 | -3.80683800 |
| C | -3.91708100 | 3.17979600  | 1.17666800  |
| H | -3.69187200 | 4.24648900  | 1.23206100  |
| H | -4.60029100 | 2.91654600  | 1.98580400  |

|    |             |             |             |
|----|-------------|-------------|-------------|
| H  | -4.41548700 | 2.98597100  | 0.22246000  |
| Ni | -0.35639800 | -0.03660700 | 0.10134200  |
| C  | 0.16984200  | -1.64726100 | 1.09733800  |
| C  | -0.04722900 | -1.71360900 | 2.48867500  |
| C  | 0.56122500  | -2.84579200 | 0.47198100  |
| C  | 0.11262400  | -2.89615800 | 3.21845200  |
| H  | -0.34337000 | -0.81730200 | 3.03799800  |
| C  | 0.72281200  | -4.03692600 | 1.18792800  |
| H  | 0.75062900  | -2.84807300 | -0.59820900 |
| C  | 0.49728700  | -4.06875700 | 2.56561100  |
| H  | -0.05492200 | -2.89976100 | 4.29394500  |
| H  | 1.03139700  | -4.94160900 | 0.66762200  |
| H  | 0.62898600  | -4.99181200 | 3.12514500  |
| Br | -0.02970300 | -0.54049200 | -2.25164100 |
| H  | -1.44489200 | 4.00018600  | -2.43296000 |
| H  | -0.41777500 | 4.98797500  | -1.35600700 |
| H  | -5.13858500 | -1.20962200 | 1.71720800  |
| H  | -3.84584100 | -1.25902300 | 2.95431800  |
| C  | 2.43352100  | 0.39083800  | 1.22394600  |
| H  | 2.34659600  | 0.78930900  | 0.21944100  |
| C  | 1.98166200  | 1.22533800  | 2.37671100  |
| H  | 2.79682700  | 1.88815800  | 2.70852600  |
| H  | 1.13672700  | 1.86448800  | 2.10676600  |
| H  | 1.72640800  | 0.59505400  | 3.23343000  |
| C  | 3.36307700  | -0.69470400 | 1.48672900  |
| C  | 4.02261200  | -1.42574300 | 0.35279600  |
| C  | 3.54990700  | -1.39141600 | -0.96752900 |
| C  | 5.17095700  | -2.17835900 | 0.64582200  |
| C  | 4.22011700  | -2.09020700 | -1.97307700 |
| H  | 2.63721300  | -0.86103900 | -1.21918800 |
| C  | 5.84437700  | -2.86626500 | -0.36005100 |
| H  | 5.51400100  | -2.20809700 | 1.67487000  |
| C  | 5.37107900  | -2.82221500 | -1.67531400 |
| H  | 3.83174600  | -2.06748600 | -2.98790700 |
| H  | 6.73638600  | -3.44004900 | -0.12093900 |
| H  | 5.89326100  | -3.36215100 | -2.46149200 |
| O  | 3.67533700  | -0.96005100 | 2.65932800  |

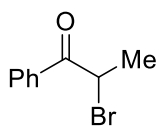

**R-Br singlet**

|    |             |             |             |
|----|-------------|-------------|-------------|
| C  | 2.31857800  | 1.07276300  | -0.51045600 |
| C  | 3.58143700  | 0.48969600  | -0.48215100 |
| C  | 3.75932500  | -0.76224600 | 0.11473300  |
| C  | 2.66879200  | -1.42754400 | 0.67894900  |
| C  | 1.40267700  | -0.84395900 | 0.65328700  |
| C  | 1.21545900  | 0.41486300  | 0.05964600  |
| C  | -0.10286900 | 1.11997100  | 0.01543700  |
| O  | -0.22959600 | 2.19204500  | -0.55442700 |
| H  | 4.42795200  | 1.00822800  | -0.92369400 |
| H  | 4.74507300  | -1.21920900 | 0.13745500  |
| H  | 2.80250800  | -2.40406500 | 1.13574200  |
| H  | 0.56285400  | -1.38746200 | 1.07257700  |
| H  | 2.15788500  | 2.04350900  | -0.96742300 |
| C  | -1.31457700 | 0.51968400  | 0.74472400  |
| C  | -2.41533900 | 1.53082800  | 1.00310700  |
| H  | -1.01278800 | 0.00741200  | 1.65870400  |
| Br | -2.01394200 | -0.96117800 | -0.41613700 |
| H  | -2.03920700 | 2.30573200  | 1.68252100  |
| H  | -3.28021900 | 1.04863500  | 1.46545300  |
| H  | -2.72021600 | 2.01775000  | 0.07521600  |

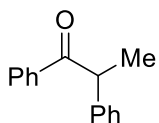

**R-Ph singlet**

|   |            |             |             |
|---|------------|-------------|-------------|
| C | 2.84574900 | 0.55142600  | 0.74077300  |
| C | 3.90193700 | -0.35430100 | 0.74590000  |
| C | 3.81252400 | -1.53589600 | 0.00315700  |
| C | 2.66271100 | -1.80512300 | -0.74174900 |
| C | 1.60648500 | -0.89387300 | -0.75326800 |

|   |             |             |             |
|---|-------------|-------------|-------------|
| C | 1.68739500  | 0.29564500  | -0.01242600 |
| H | 2.89130200  | 1.47237500  | 1.31262200  |
| H | 4.79497800  | -0.14316400 | 1.32790500  |
| H | 4.63591800  | -2.24530400 | 0.00718200  |
| H | 2.58668600  | -2.72608800 | -1.31325000 |
| H | 0.71345700  | -1.12680300 | -1.32279800 |
| C | 0.59474500  | 1.32325600  | 0.02137900  |
| C | -0.63204000 | 1.16600600  | -0.89519700 |
| O | 0.67336000  | 2.28067000  | 0.77903500  |
| C | -1.28536300 | 2.53393300  | -1.16064300 |
| H | -2.15740500 | 2.41236200  | -1.81124200 |
| H | -0.57828600 | 3.21548600  | -1.64585000 |
| H | -1.60674500 | 2.99739600  | -0.22492800 |
| H | -3.24931800 | -0.49240600 | 2.63869400  |
| C | -2.96064100 | -0.58924700 | 1.59532900  |
| C | -3.52882000 | -1.58843200 | 0.80200400  |
| H | -4.26135400 | -2.27150900 | 1.22345000  |
| C | -3.14888100 | -1.70376800 | -0.53617400 |
| H | -3.58607400 | -2.47616300 | -1.16366700 |
| C | -2.20497100 | -0.82652200 | -1.07336900 |
| H | -1.91817000 | -0.91896500 | -2.11917500 |
| C | -1.62830000 | 0.17964400  | -0.28661900 |
| C | -2.01888100 | 0.28791300  | 1.05609800  |
| H | -1.57963800 | 1.06138900  | 1.68032300  |
| H | -0.29411900 | 0.75208000  | -1.85272100 |

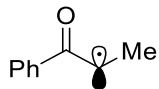

**R• doublet**

|   |            |             |             |
|---|------------|-------------|-------------|
| C | 1.09953900 | 1.19308900  | 0.07785200  |
| C | 2.48026400 | 1.01792100  | 0.10787900  |
| C | 3.02541500 | -0.26718600 | 0.03203500  |
| C | 2.18016800 | -1.37301200 | -0.07619100 |
| C | 0.79623800 | -1.19753900 | -0.09939500 |
| C | 0.23854400 | 0.08820600  | -0.01855200 |
| H | 0.65759700 | 2.18263700  | 0.12697300  |

|   |             |             |             |
|---|-------------|-------------|-------------|
| H | 3.13379300  | 1.88245000  | 0.18870100  |
| H | 4.10314900  | -0.40551200 | 0.05345900  |
| H | 2.59758600  | -2.37392600 | -0.14564100 |
| H | 0.15992200  | -2.07118800 | -0.20132200 |
| C | -1.23985900 | 0.35978800  | -0.04793000 |
| C | -2.18202200 | -0.72123500 | 0.12090600  |
| O | -1.65157900 | 1.52649400  | -0.19487000 |
| C | -3.64944200 | -0.49317400 | 0.07322700  |
| H | -4.12006000 | -1.12460300 | -0.69483500 |
| H | -3.86645000 | 0.55581800  | -0.13785400 |
| H | -4.12179600 | -0.77239500 | 1.02699600  |
| H | -1.82418000 | -1.72637400 | 0.32349600  |

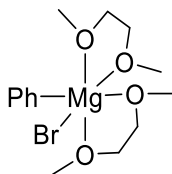

***cis*-PhMgBr(dme)<sub>2</sub> singlet**

|    |             |             |             |
|----|-------------|-------------|-------------|
| Mg | 0.20688600  | -0.06047100 | 0.00065800  |
| Br | 1.15543100  | -2.41928600 | -0.34736900 |
| C  | 3.02856800  | 0.05688300  | 1.30792600  |
| C  | 2.14405600  | 0.44803500  | 2.47779900  |
| O  | 2.47556800  | 0.63934000  | 0.12351600  |
| O  | 0.78921000  | 0.21040300  | 2.10814100  |
| H  | 2.41194800  | -0.16030700 | 3.35219400  |
| H  | 2.26935400  | 1.50862000  | 2.74166500  |
| H  | 4.04782200  | 0.43598400  | 1.47337900  |
| H  | 3.05216000  | -1.03221500 | 1.18887800  |
| C  | -0.54476900 | 1.69008500  | -2.41266000 |
| C  | 0.11595100  | 2.76010500  | -1.57089000 |
| H  | -0.49939800 | 1.97610200  | -3.47323600 |
| H  | -1.59229200 | 1.55819900  | -2.11469900 |
| H  | -0.44206200 | 3.70318300  | -1.66937000 |
| H  | 1.15186700  | 2.93369200  | -1.90029400 |
| O  | 0.10378800  | 2.32055200  | -0.21914100 |
| O  | 0.16729100  | 0.46839900  | -2.20862800 |

|   |             |             |             |
|---|-------------|-------------|-------------|
| C | -0.31549200 | -0.58585100 | -3.06230300 |
| H | -1.37984100 | -0.76472200 | -2.87347000 |
| H | -0.15660600 | -0.30547400 | -4.11146200 |
| H | 0.25624700  | -1.47588000 | -2.80259600 |
| C | 0.64164300  | 3.27575400  | 0.68351800  |
| H | 1.70632900  | 3.45424700  | 0.48208700  |
| H | 0.09054900  | 4.22336900  | 0.61220500  |
| H | 0.52228100  | 2.86363900  | 1.68545000  |
| C | -0.12769700 | 0.16639800  | 3.20578000  |
| H | 0.12821300  | -0.66362100 | 3.87526100  |
| H | -0.10145200 | 1.11229500  | 3.76380600  |
| H | -1.11479600 | 0.01263300  | 2.77026900  |
| C | 3.29425700  | 0.37798800  | -1.02429800 |
| H | 2.77912600  | 0.81072100  | -1.88192600 |
| H | 4.27713300  | 0.85105200  | -0.89558700 |
| H | 3.40014500  | -0.70132800 | -1.17380100 |
| C | -1.94516400 | -0.16187600 | 0.26797400  |
| C | -2.81808900 | 0.93605800  | 0.45821400  |
| C | -2.58855100 | -1.42332800 | 0.22929900  |
| C | -4.20586300 | 0.80297400  | 0.59510700  |
| H | -2.40429100 | 1.94597100  | 0.50227600  |
| C | -3.97338200 | -1.58085600 | 0.36070000  |
| H | -1.98300300 | -2.31961100 | 0.09090600  |
| C | -4.79131000 | -0.46344300 | 0.54485300  |
| H | -4.82969500 | 1.68461600  | 0.74079200  |
| H | -4.41574900 | -2.57555300 | 0.32127000  |
| H | -5.86851900 | -0.57807700 | 0.64879600  |

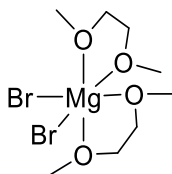

*cis*-MgBr<sub>2</sub>(dme)<sub>2</sub> singlet

|    |             |             |             |
|----|-------------|-------------|-------------|
| Mg | 0.01424600  | -0.04861300 | -0.02865000 |
| Br | -1.88706300 | -1.60411200 | 0.61445700  |
| C  | -2.38877200 | 1.77108600  | -0.56816900 |

|    |             |             |             |
|----|-------------|-------------|-------------|
| C  | -1.59002000 | 1.76930600  | -1.85907000 |
| O  | -1.44772800 | 1.67662300  | 0.50462600  |
| O  | -0.76766100 | 0.59621200  | -1.94292200 |
| H  | -2.25844500 | 1.82345500  | -2.72564300 |
| H  | -0.91106600 | 2.62683700  | -1.87833700 |
| H  | -2.96024300 | 2.70748200  | -0.48320300 |
| H  | -3.07653500 | 0.91736300  | -0.52205000 |
| Br | 1.90030500  | -1.49482400 | -0.87733600 |
| C  | 2.10759800  | 1.02189000  | 1.86622700  |
| C  | 1.77531200  | 2.23815500  | 1.01911300  |
| H  | 2.41267900  | 1.33136500  | 2.87609600  |
| H  | 2.90550100  | 0.42225400  | 1.41066300  |
| H  | 2.65173900  | 2.88972600  | 0.92091800  |
| H  | 0.96356000  | 2.80755600  | 1.48211900  |
| O  | 1.30503500  | 1.83258300  | -0.27047400 |
| O  | 0.91233800  | 0.23696200  | 1.94397700  |
| C  | 1.07307000  | -0.95724100 | 2.73662700  |
| H  | 1.85409400  | -1.58889100 | 2.30195800  |
| H  | 1.32531500  | -0.67542100 | 3.76616600  |
| H  | 0.11554600  | -1.47652100 | 2.69797700  |
| C  | 2.29439200  | 1.89281700  | -1.30989800 |
| H  | 2.63654300  | 2.92962500  | -1.42306800 |
| H  | 3.13245200  | 1.22283500  | -1.10105300 |
| H  | 1.80061000  | 1.55607800  | -2.22044300 |
| C  | -1.26482200 | -0.45153100 | -2.80025200 |
| H  | -2.21313000 | -0.84459400 | -2.42272600 |
| H  | -1.37544600 | -0.06068600 | -3.81833100 |
| H  | -0.50847500 | -1.23664400 | -2.77614300 |
| C  | -2.08483400 | 1.69319700  | 1.78882600  |
| H  | -1.29033500 | 1.60250200  | 2.52964100  |
| H  | -2.61878200 | 2.64324400  | 1.92349900  |
| H  | -2.76740600 | 0.84343000  | 1.88446000  |
